# Supplementary material for: Towards a new approach to job‐related distress: A three‐sample study of the Occupational Depression Inventory
Source: PubMed Central journal article supplement — Stress Health. 2022 Jun 20;39(1):137–53. doi: 10.1002/smi.3177 (PMC10084211; doi:10.1002/smi.3177), 2022-06-20

**ODI4 (solid) ODI3 (dashed)**

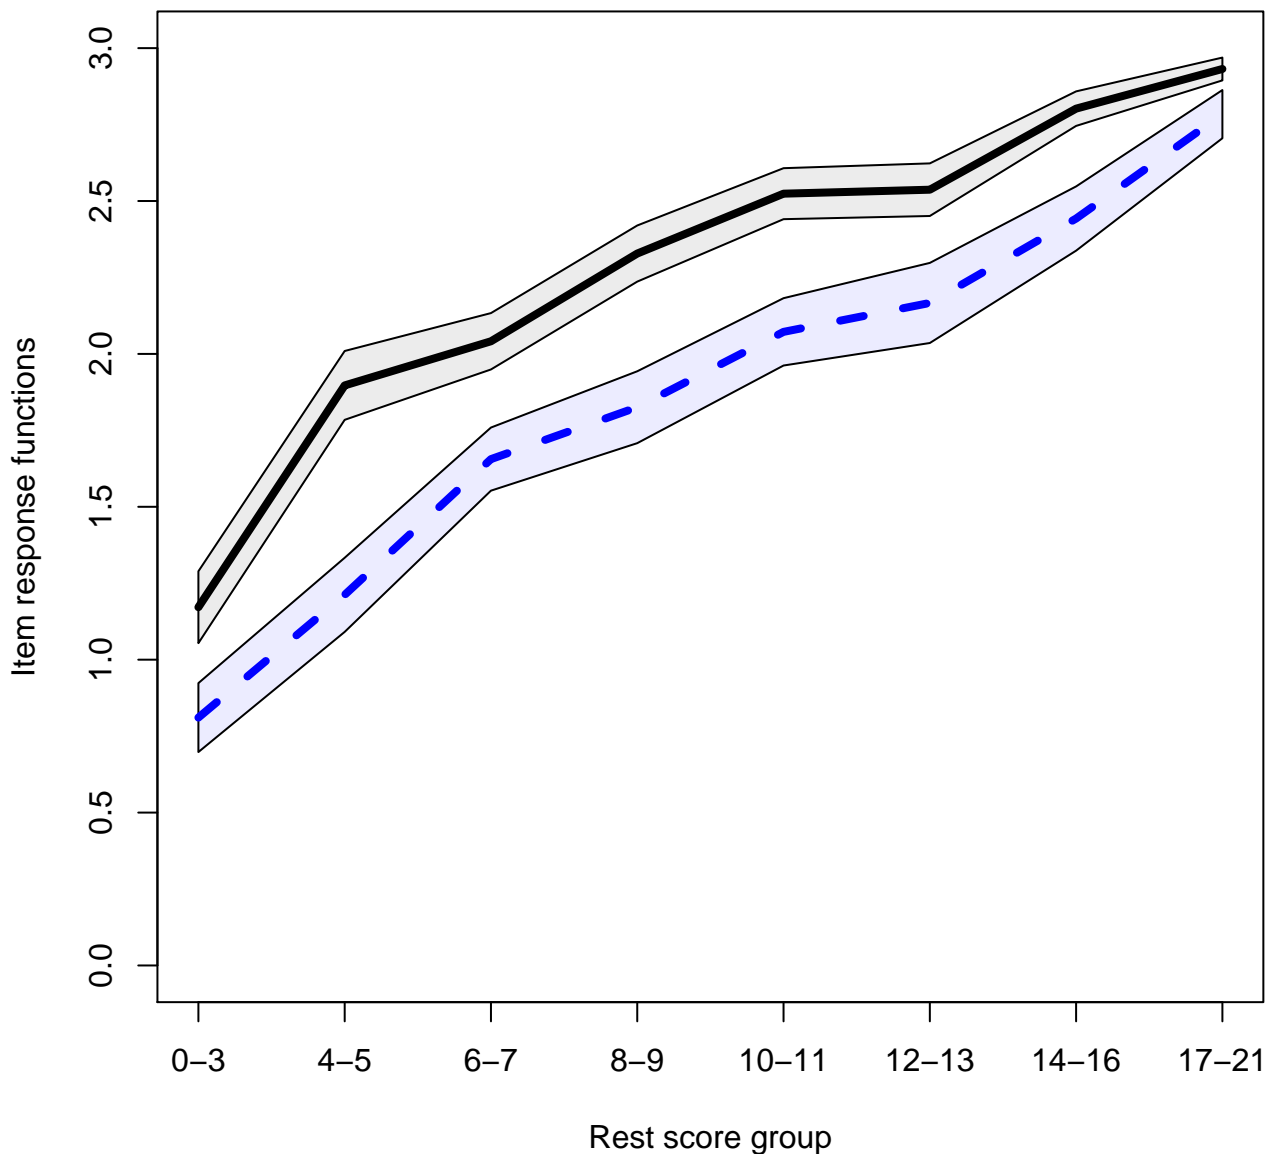

ODI4 (solid) ODI5 (dashed)

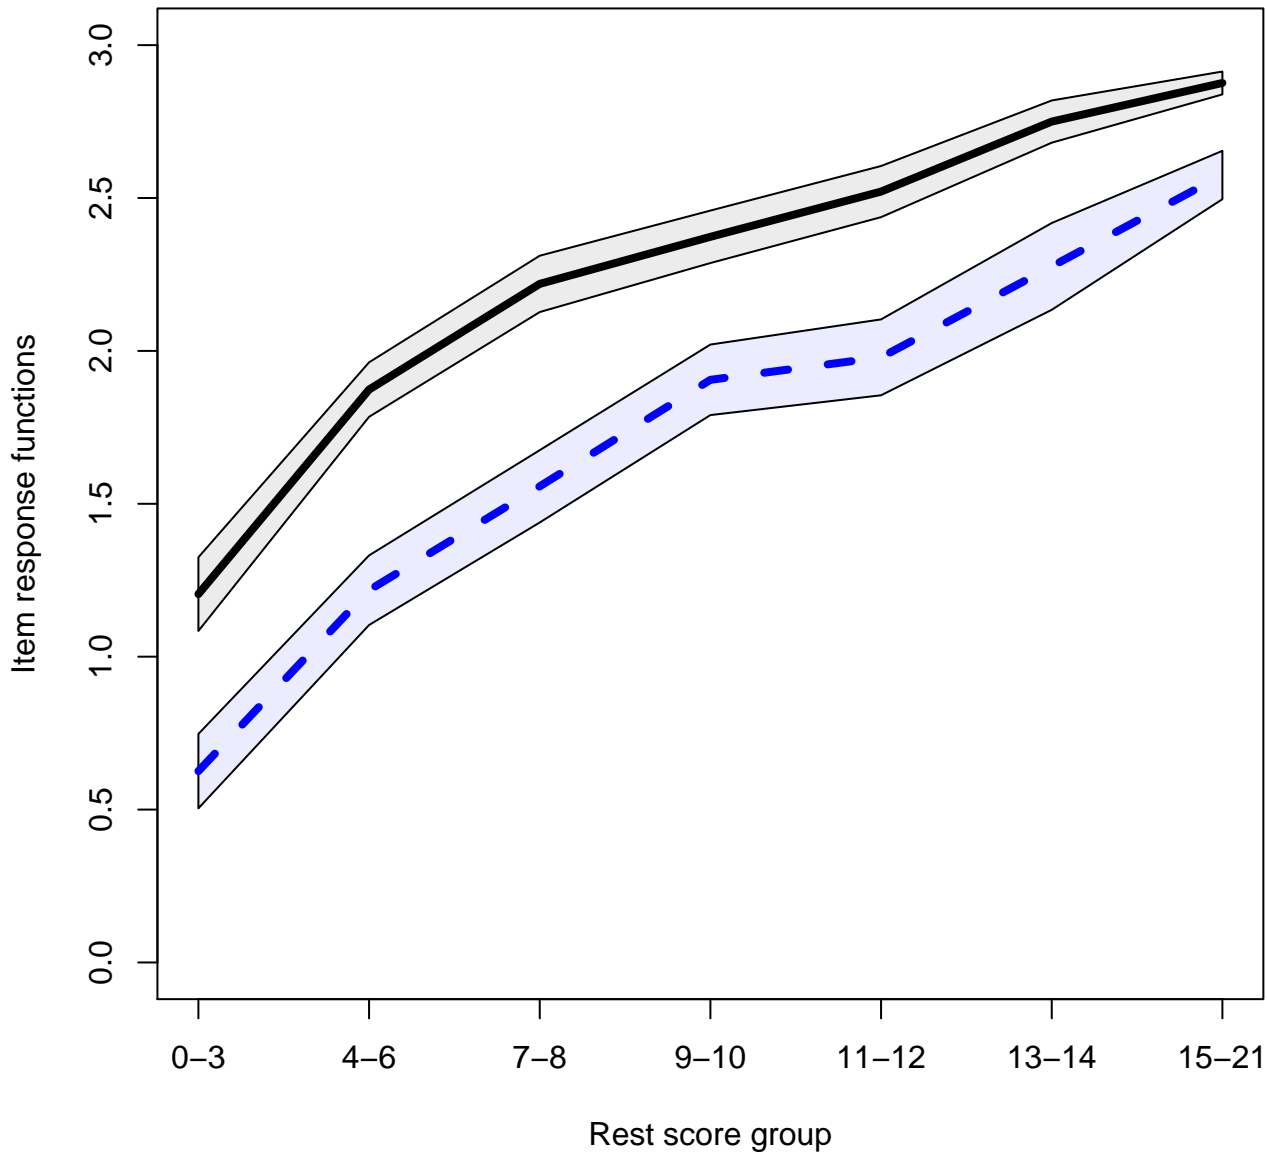

ODI4 (solid) ODI1 (dashed)

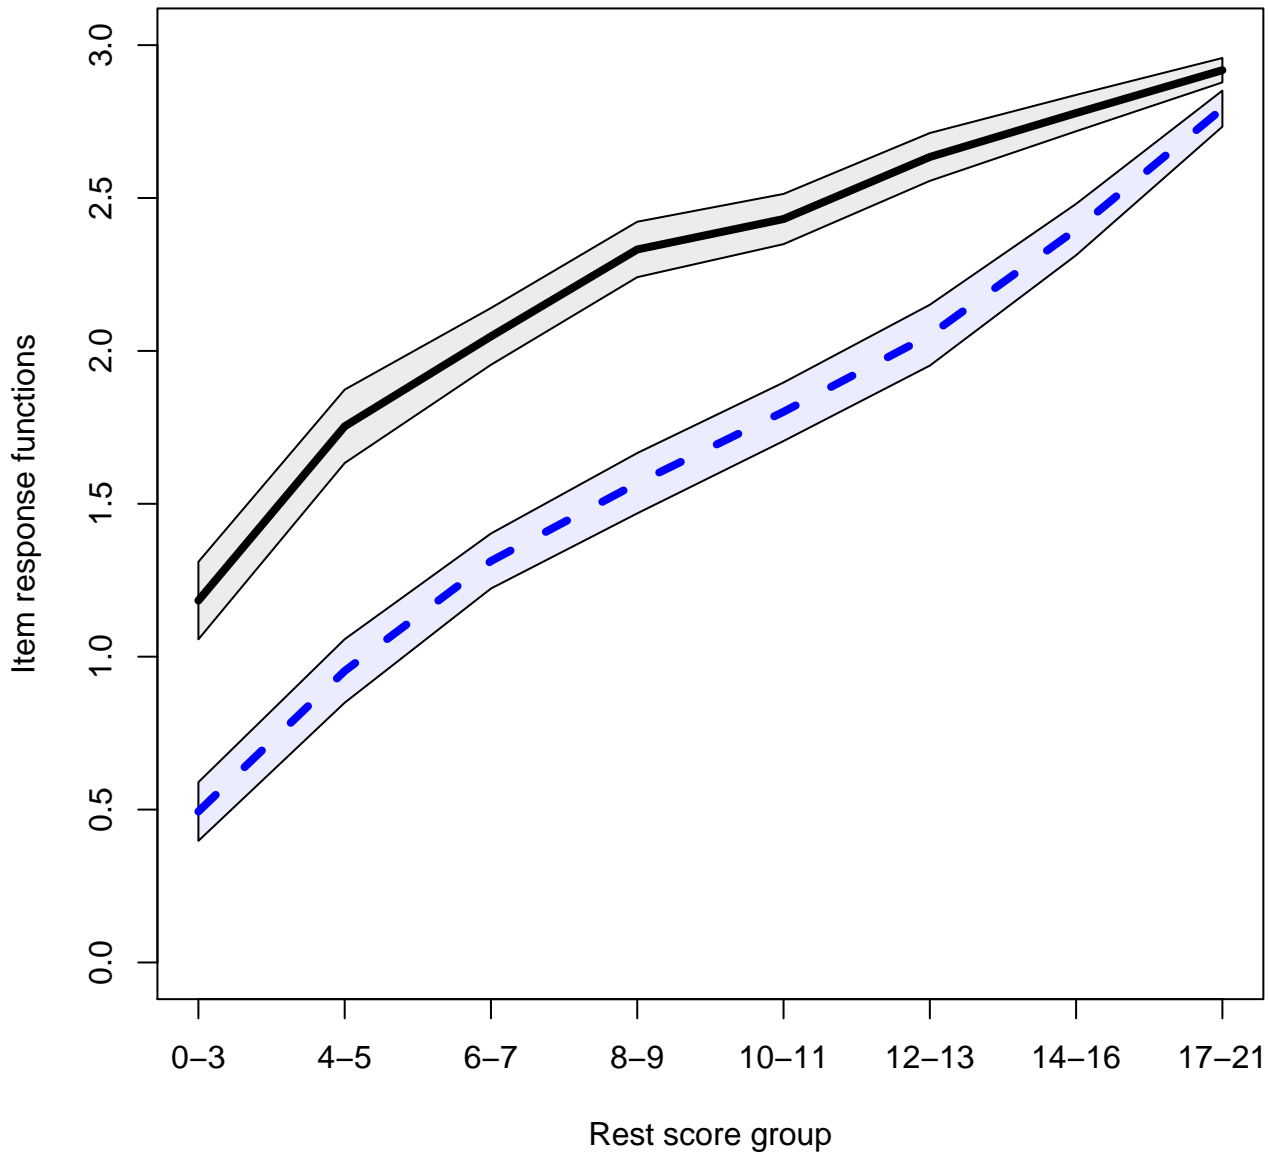

ODI4 (solid) ODI6 (dashed)

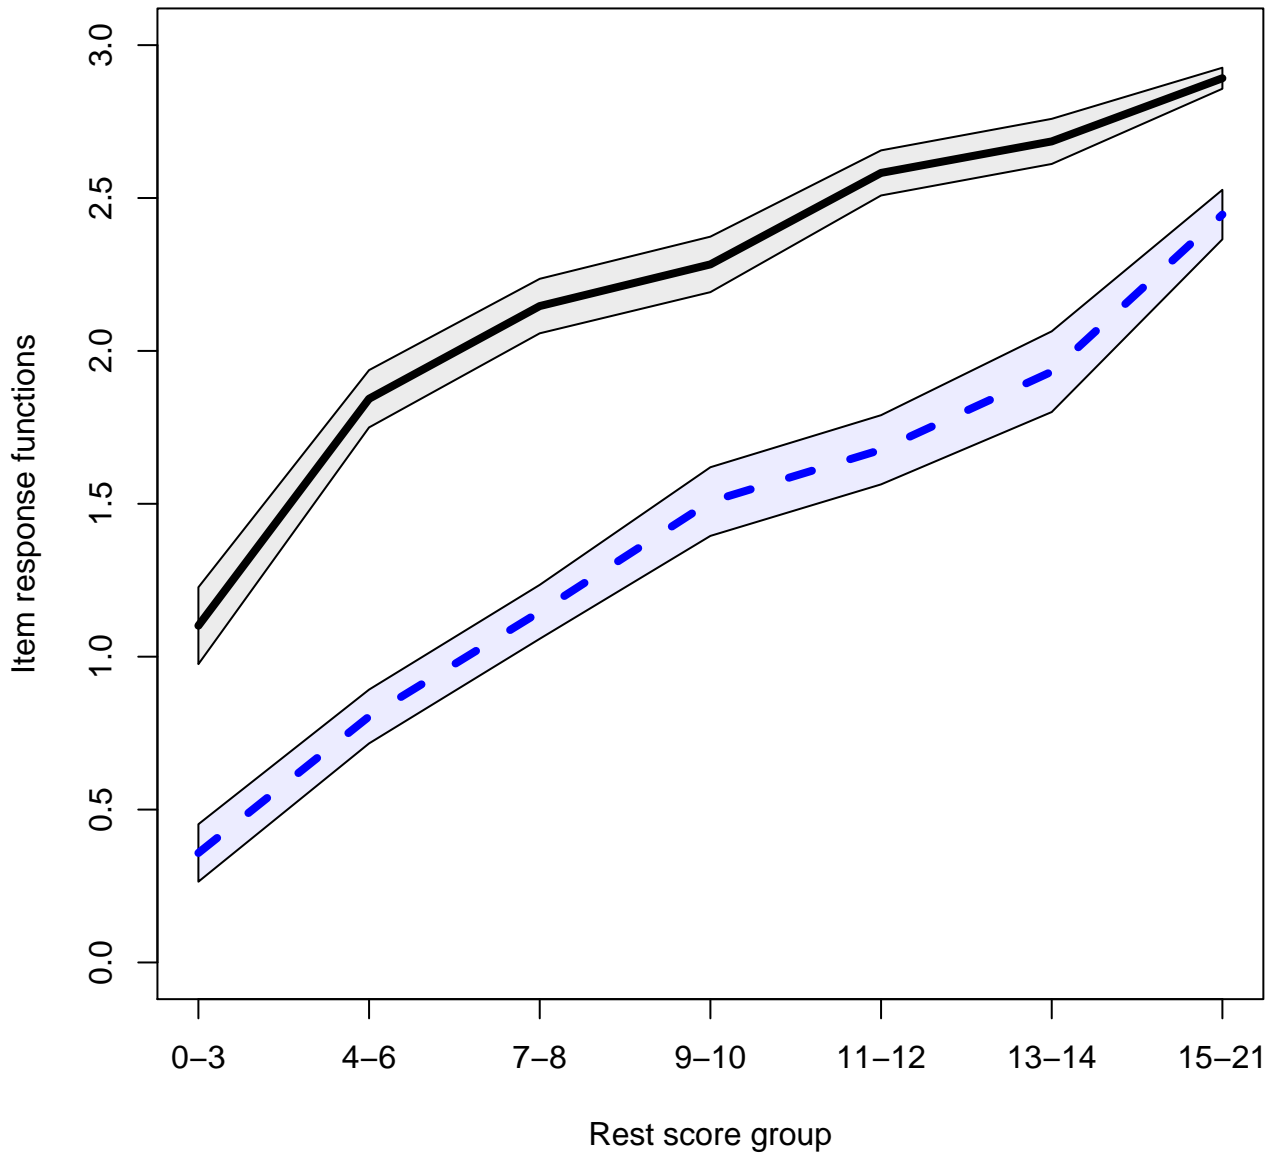

ODI4 (solid) ODI7 (dashed)

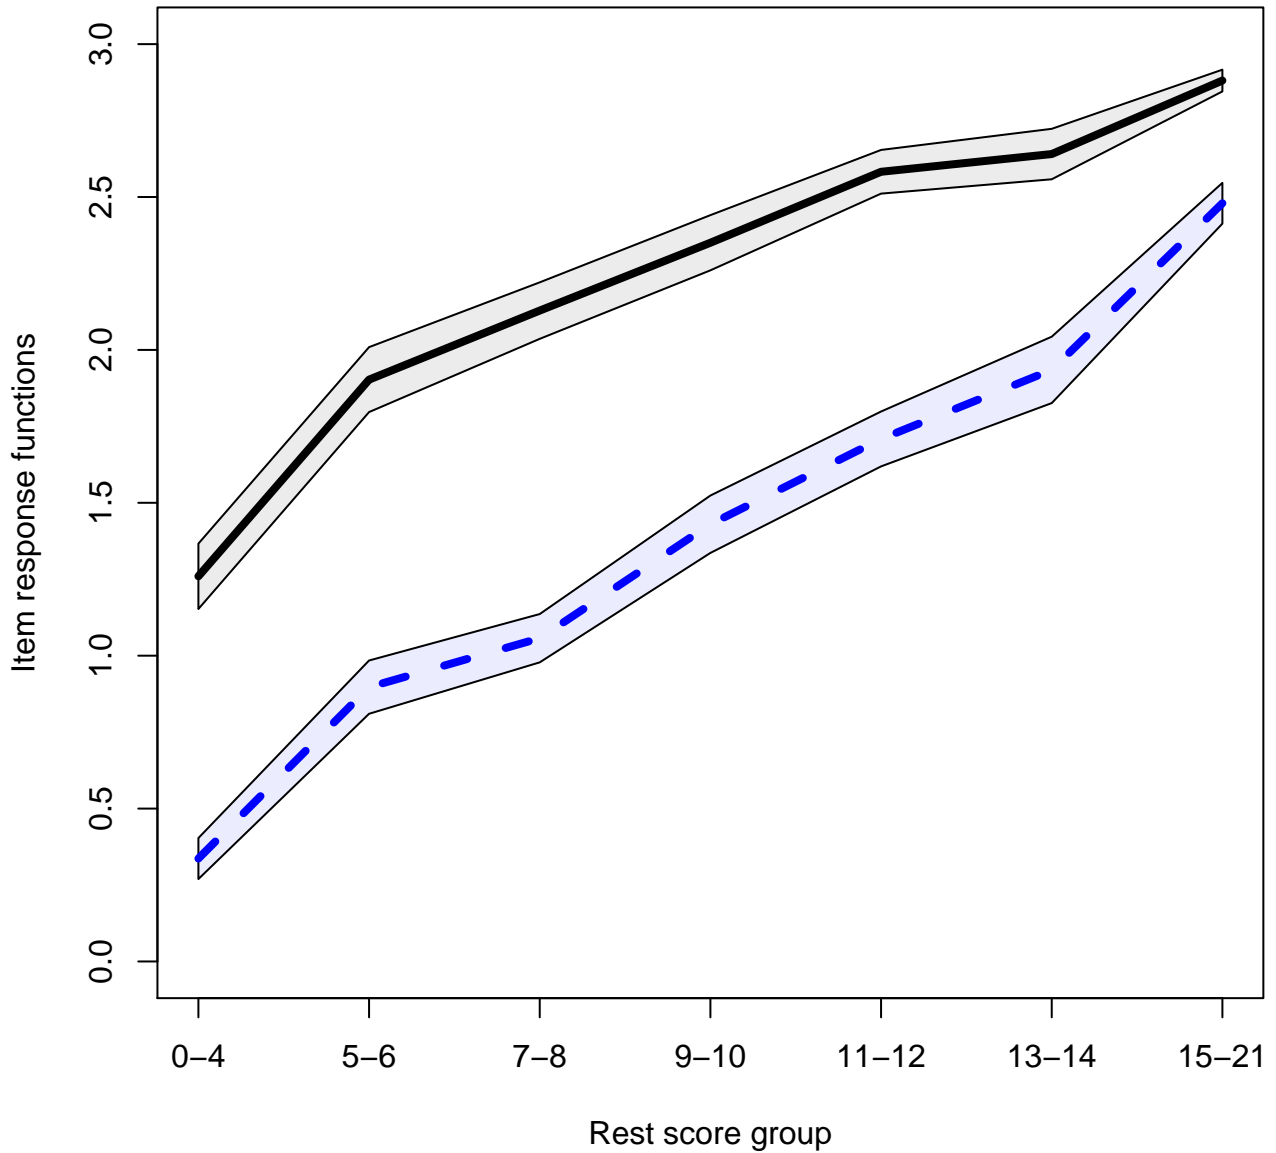

ODI4 (solid) ODI8 (dashed)

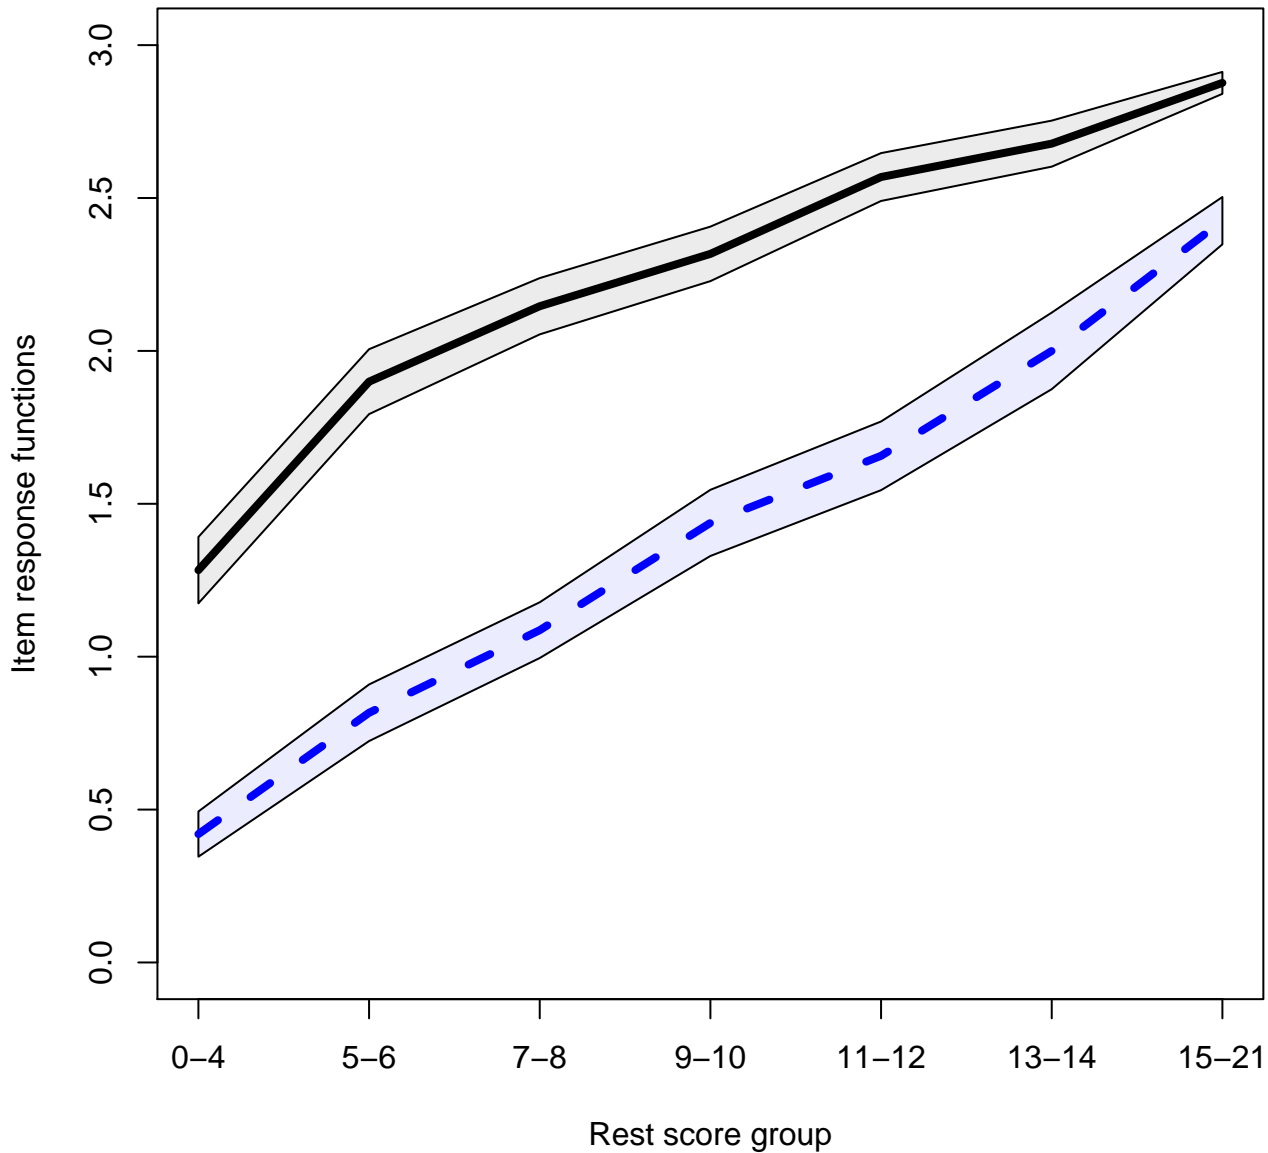

ODI4 (solid) ODI2 (dashed)

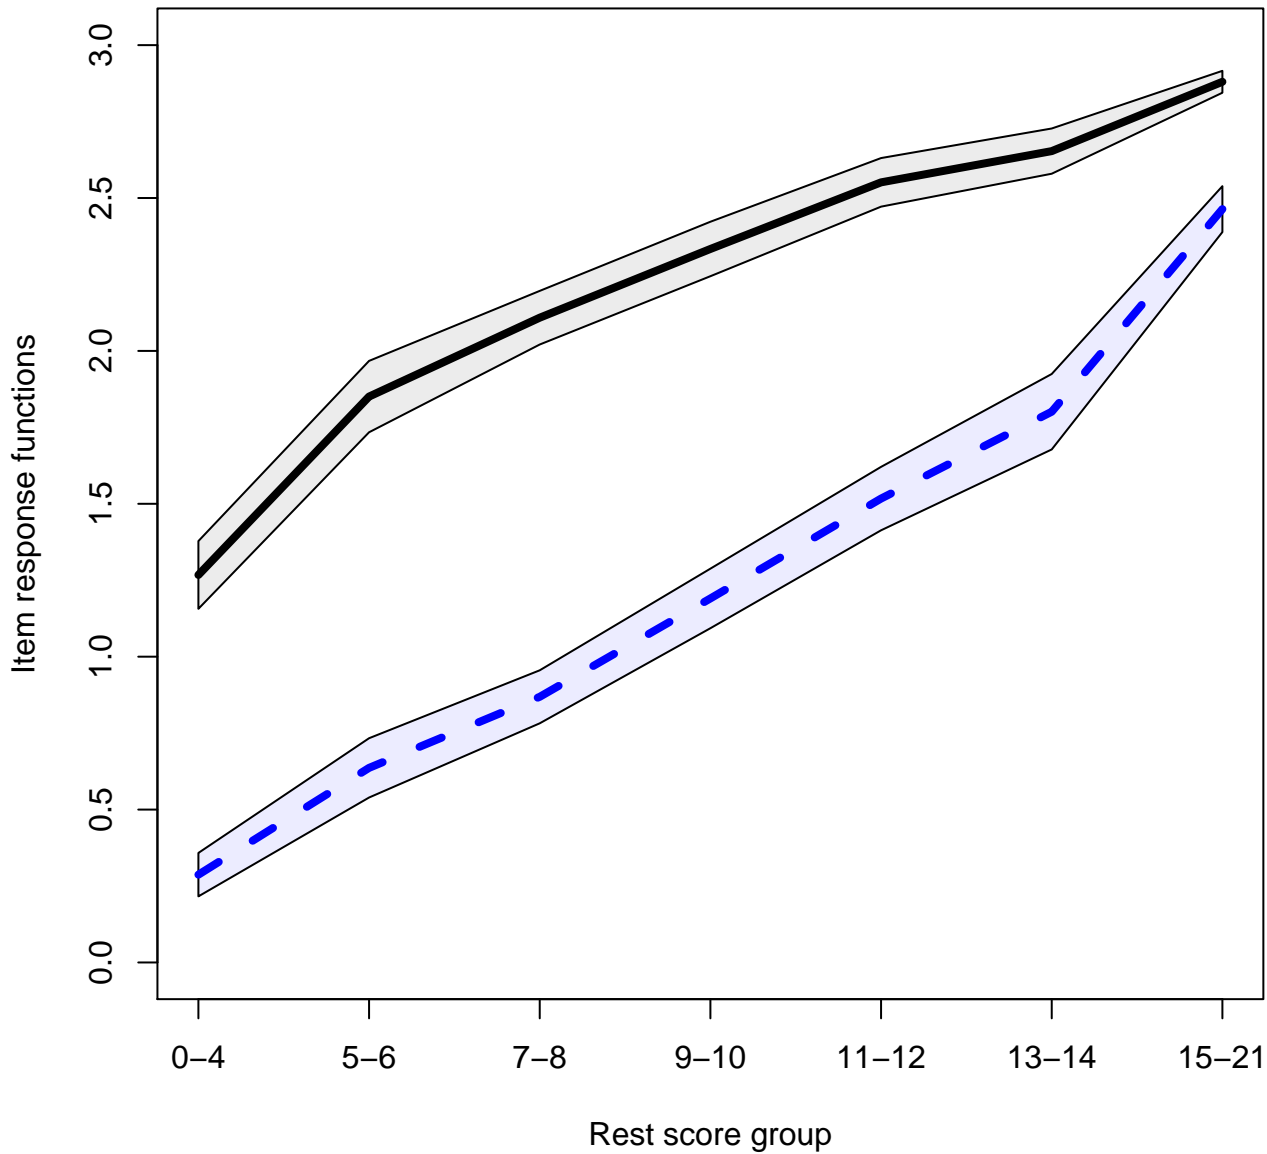

ODI4 (solid) ODI9 (dashed)

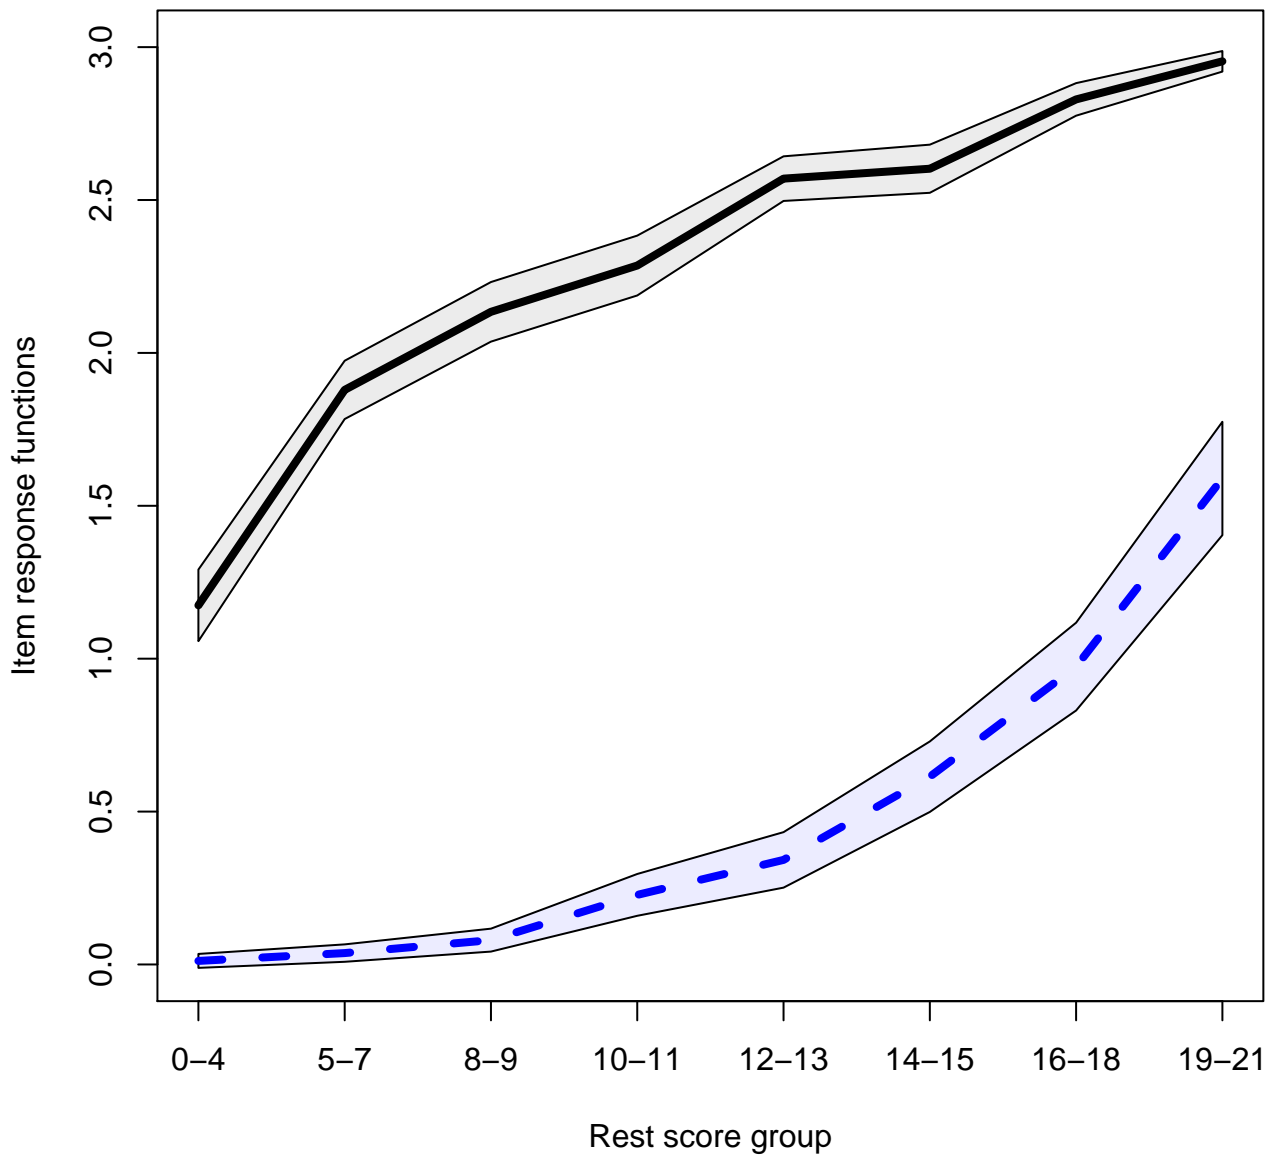



ODI3 (solid) ODI5 (dashed)

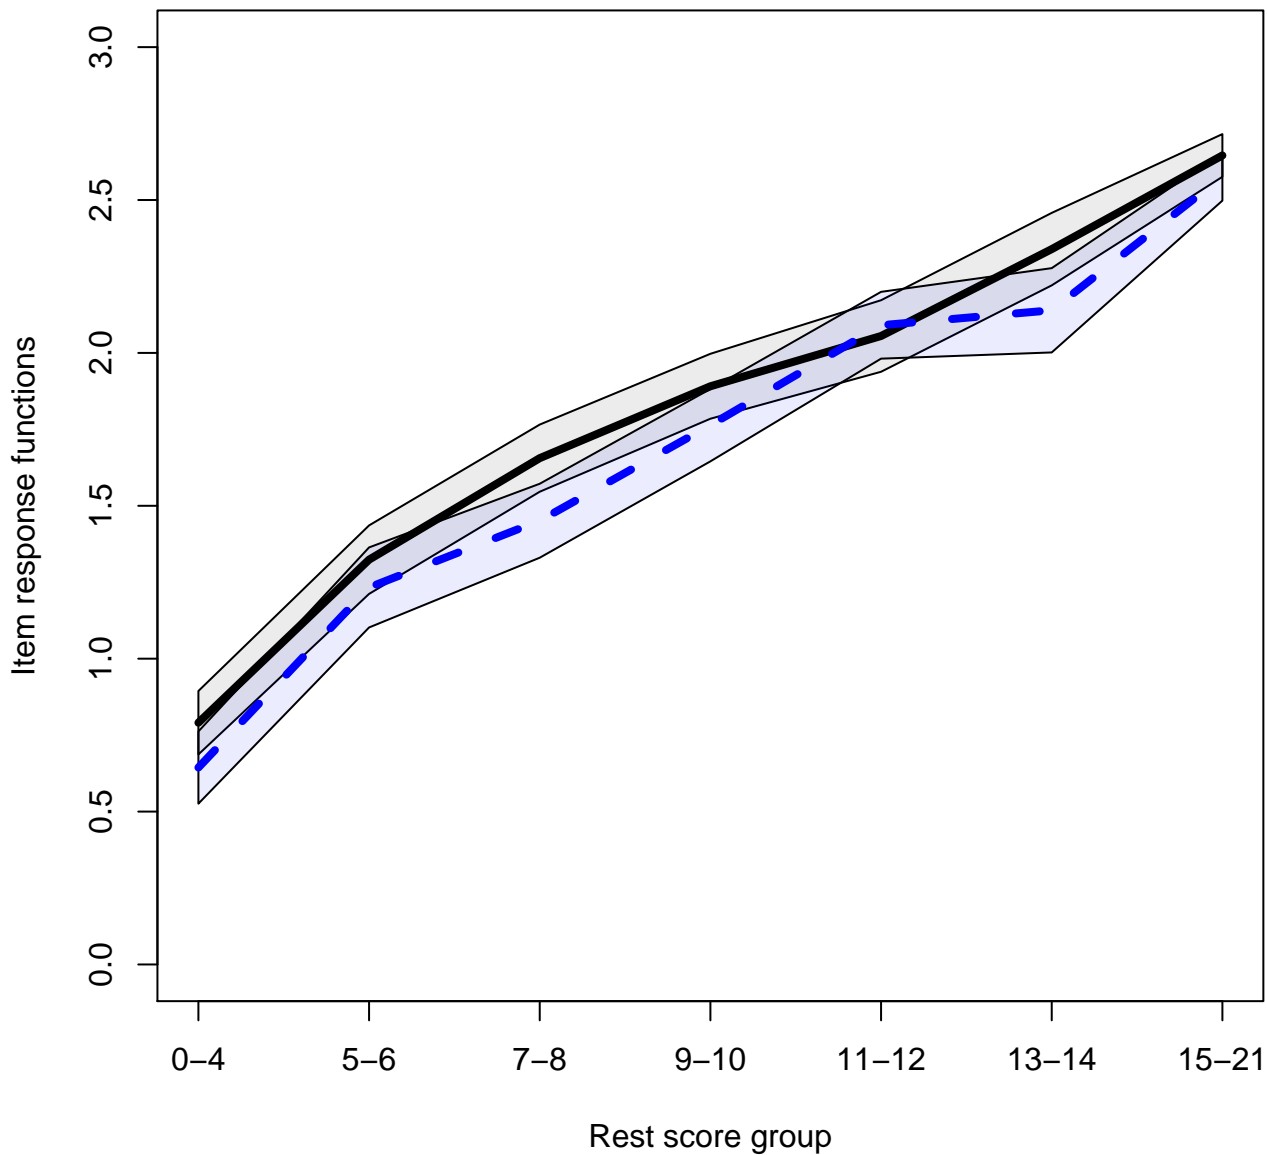

ODI3 (solid) ODI1 (dashed)

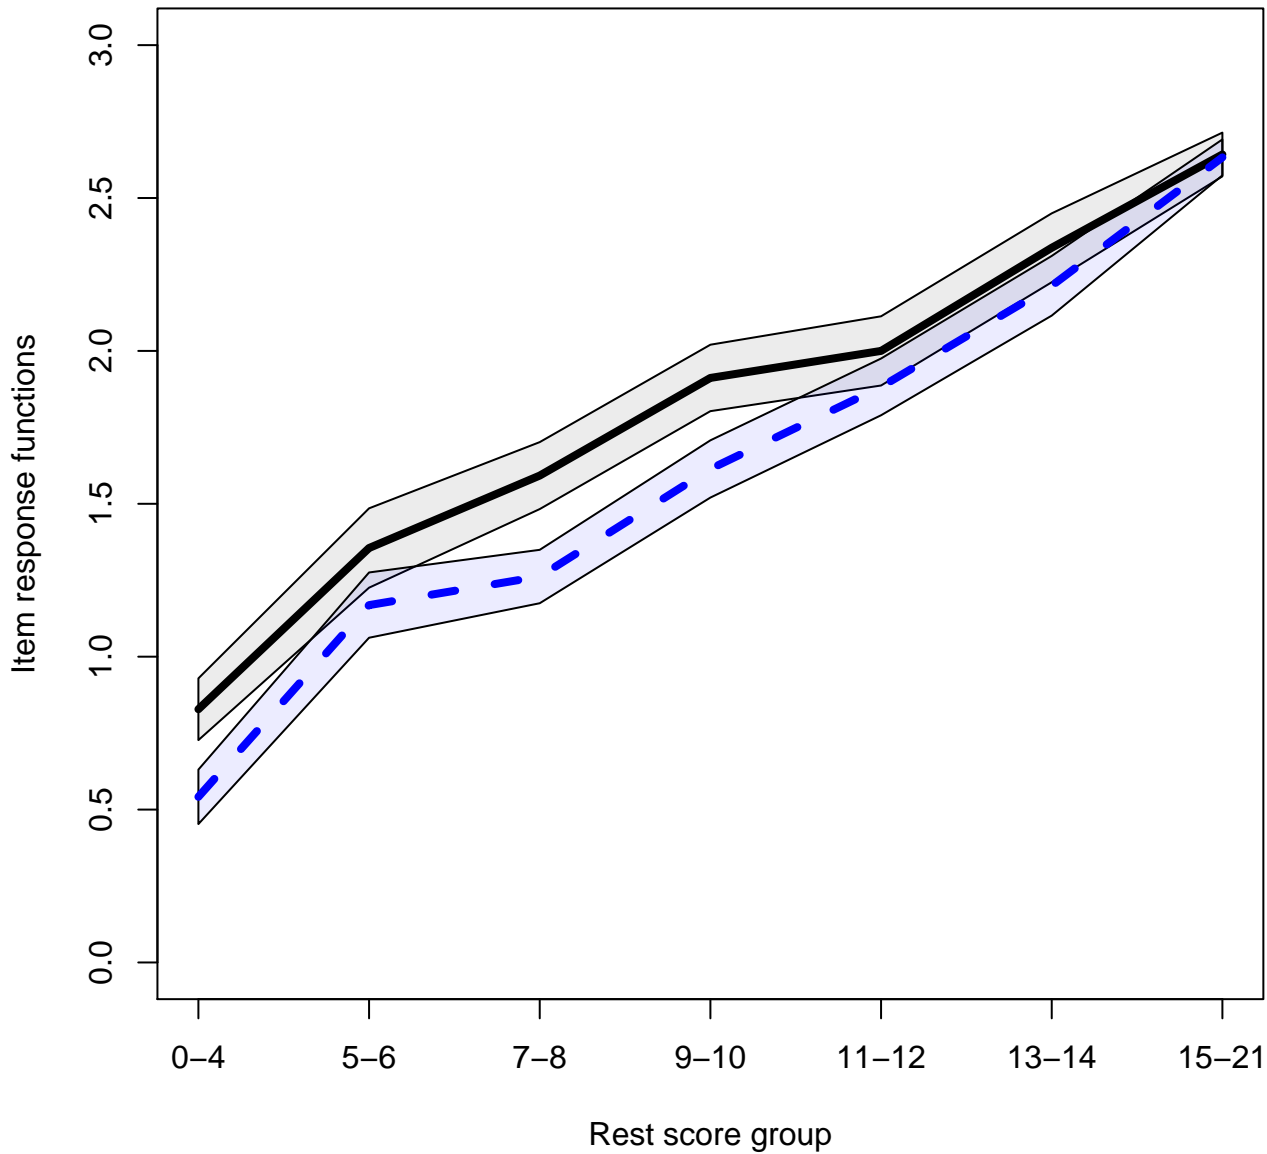

ODI3 (solid) ODI6 (dashed)

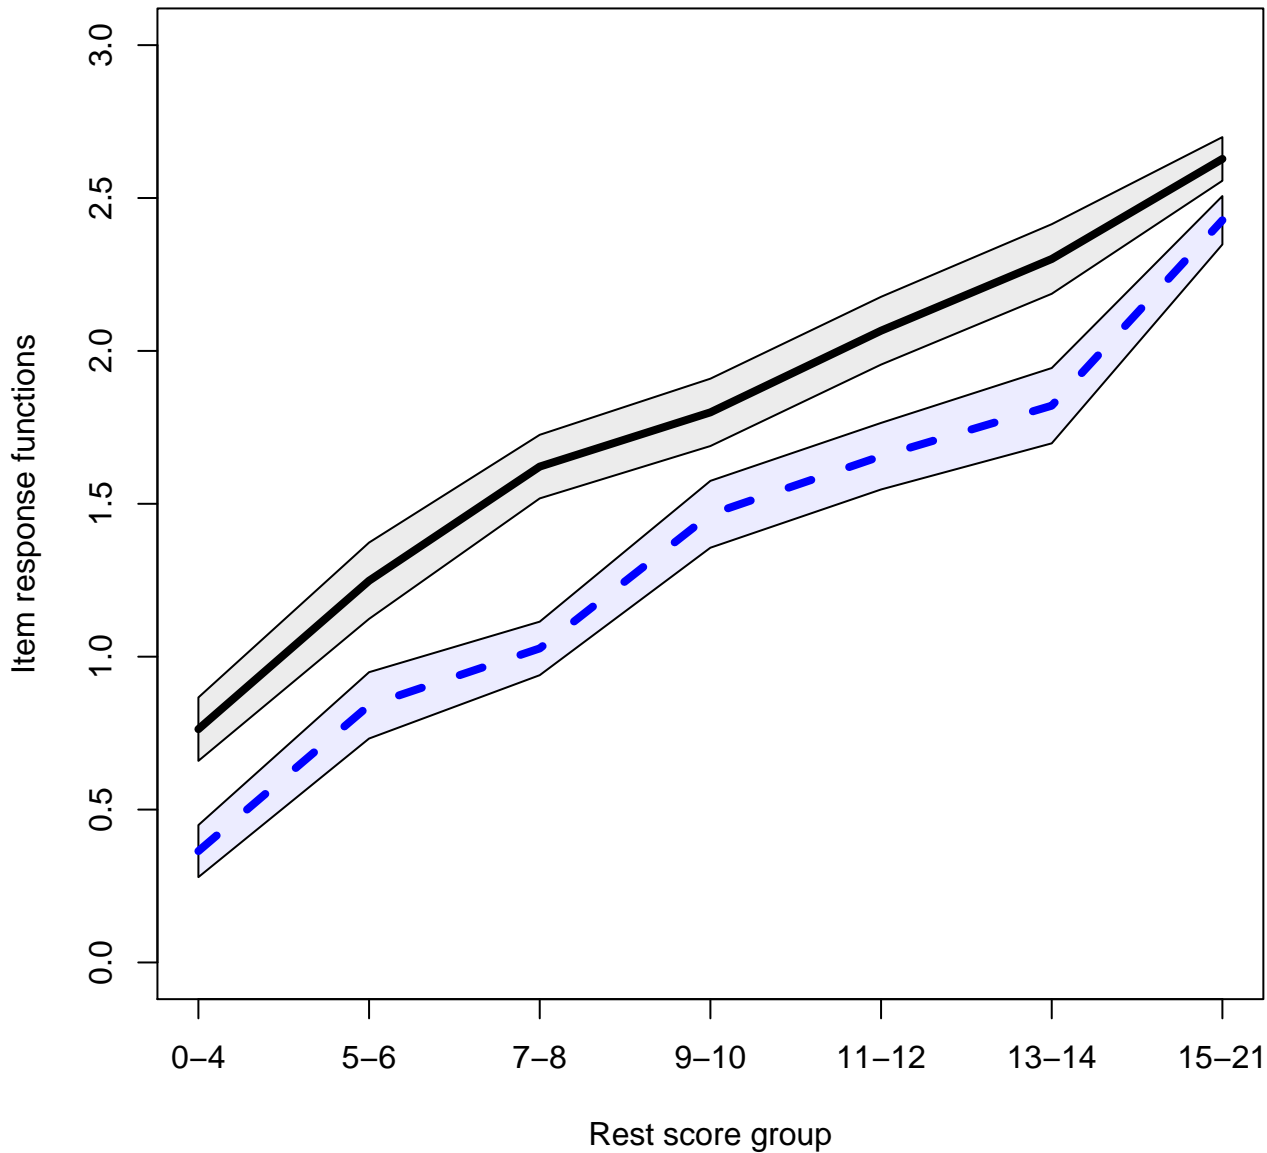

ODI3 (solid) ODI7 (dashed)

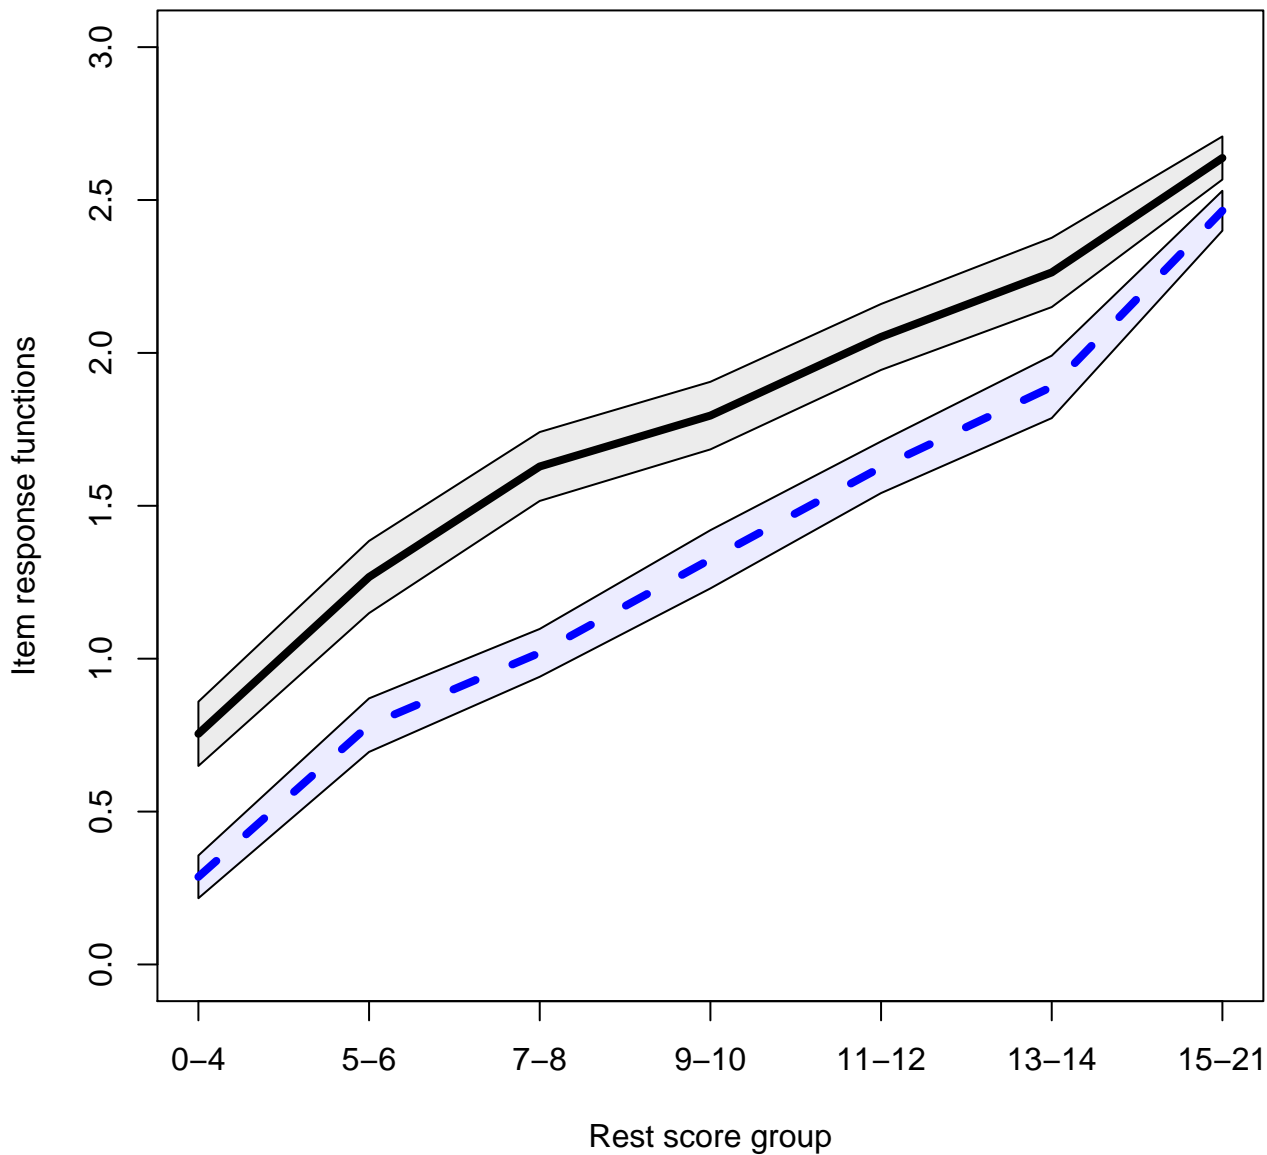

ODI3 (solid) ODI8 (dashed)

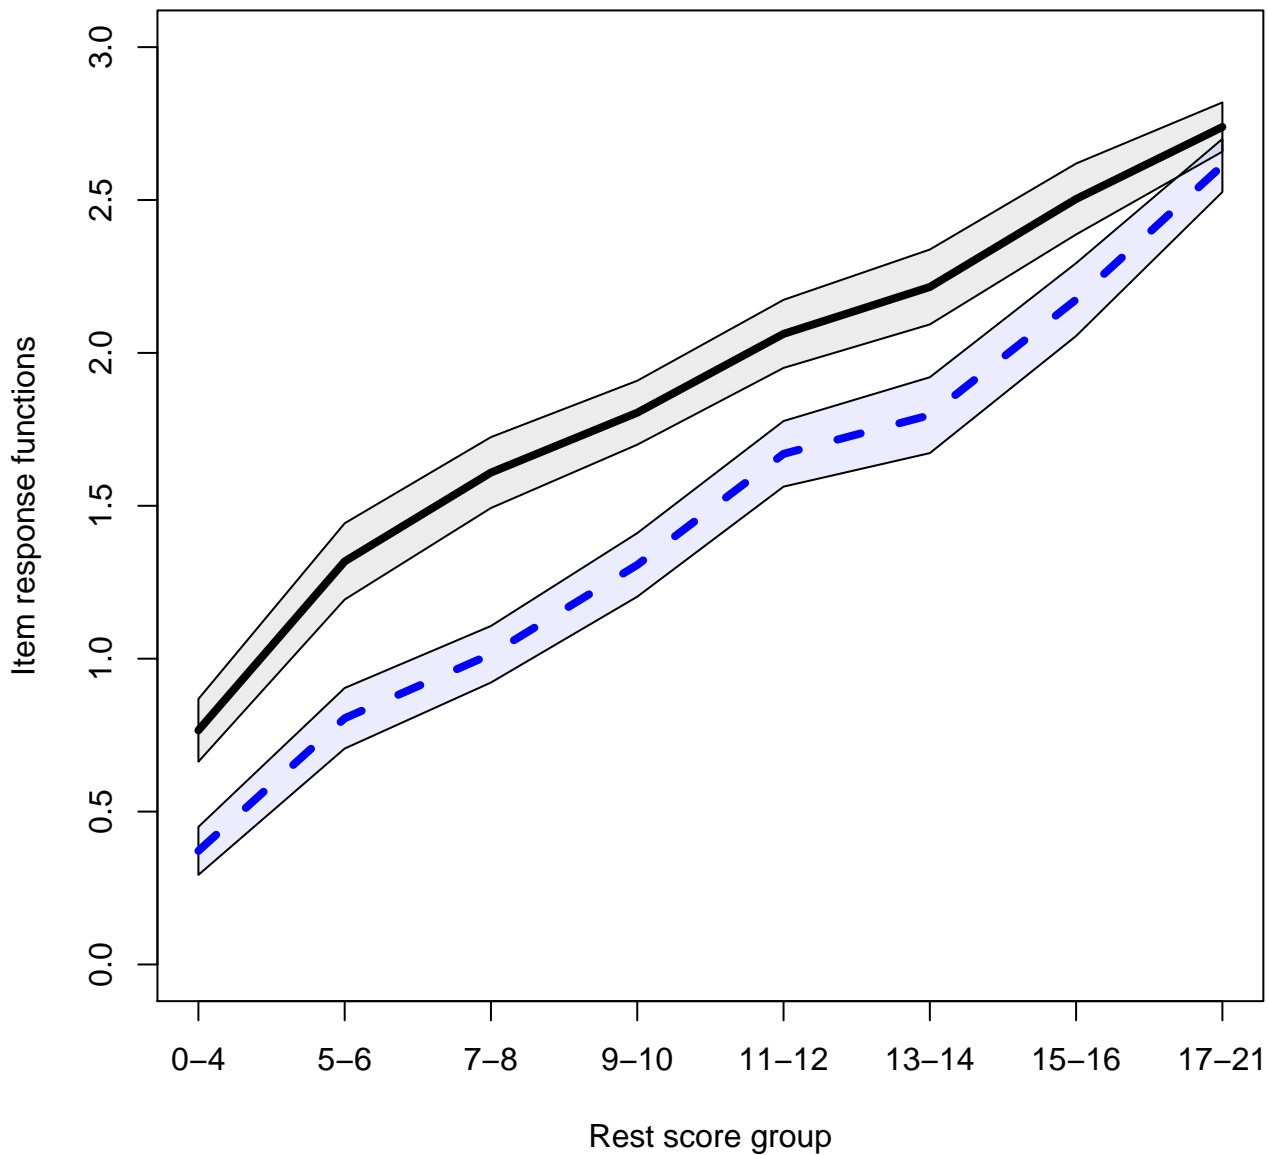

ODI3 (solid) ODI2 (dashed)

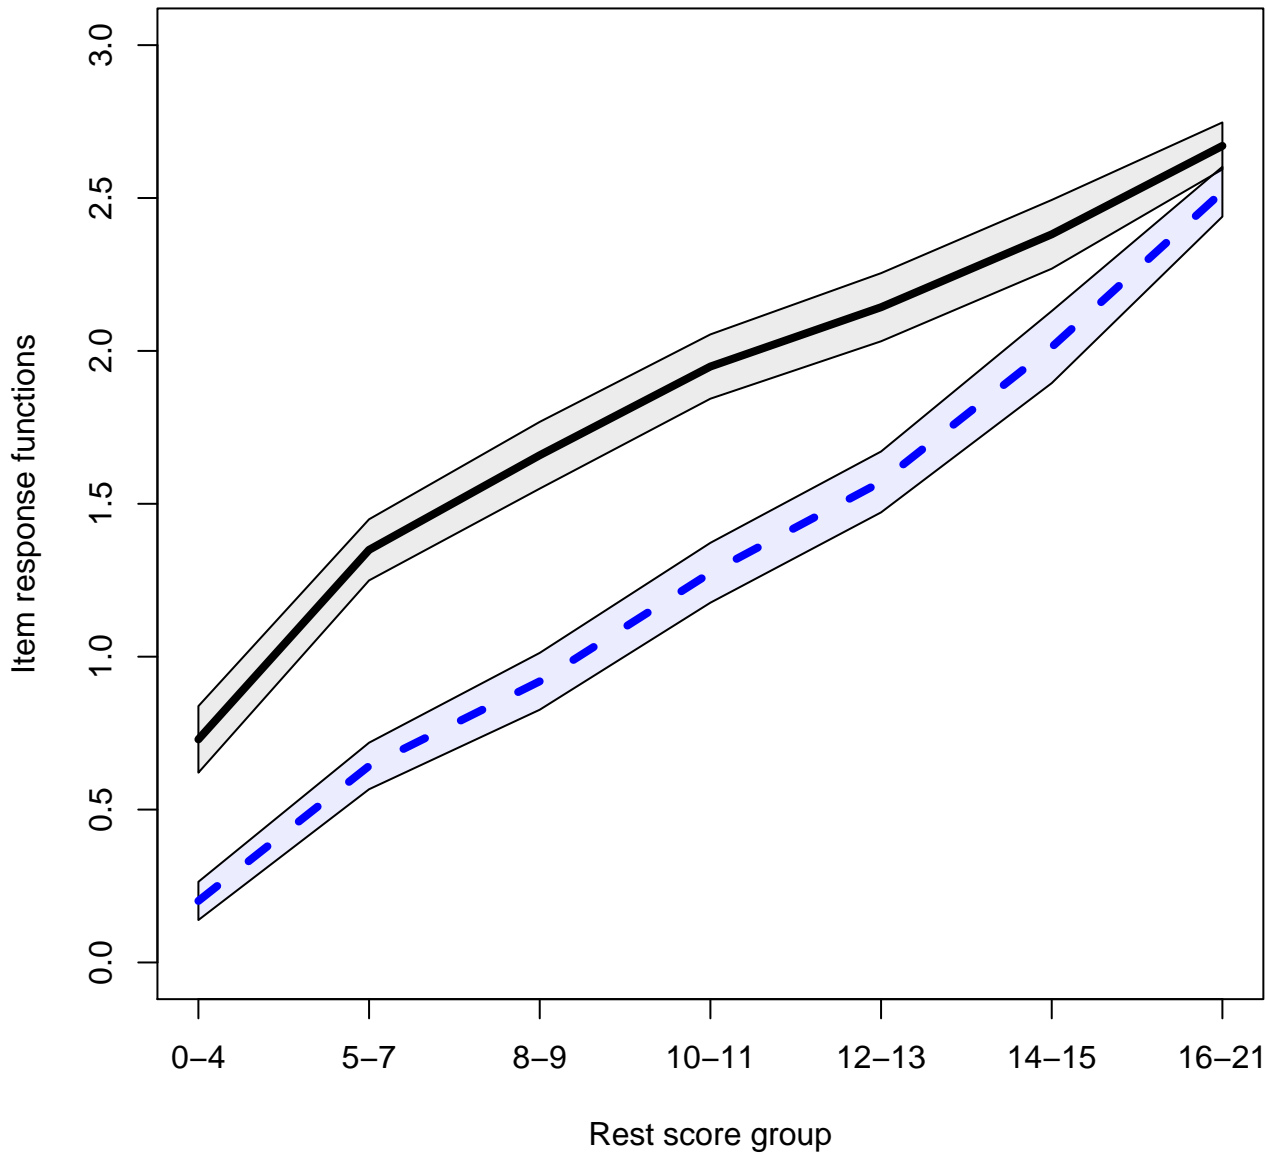

ODI3 (solid) ODI9 (dashed)

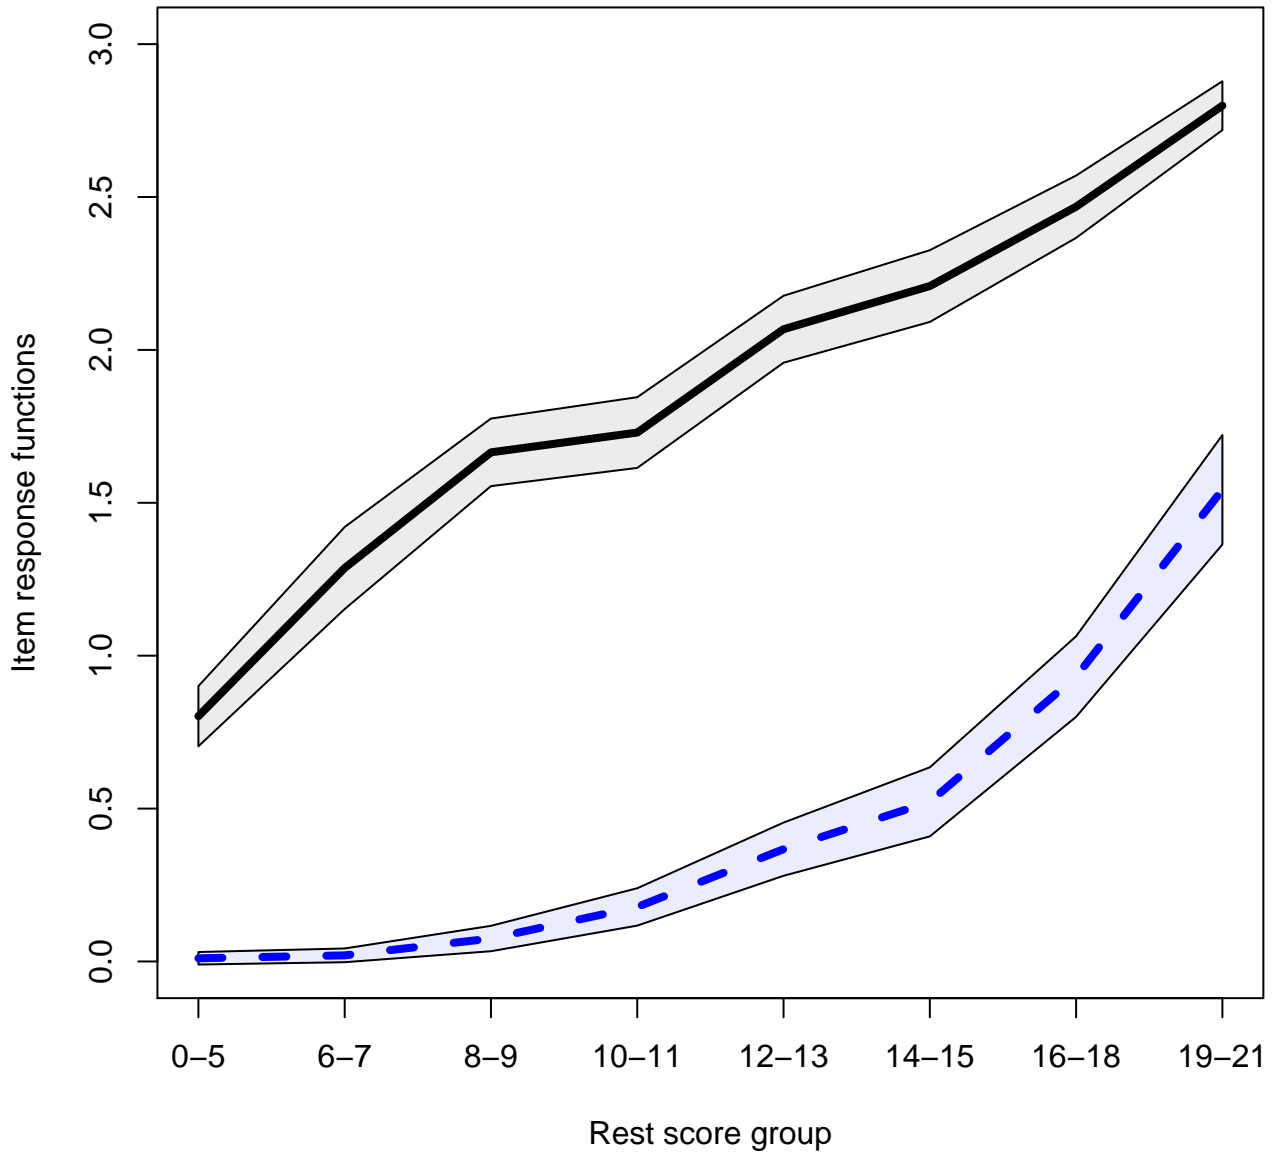

ODI5 (solid) ODI1 (dashed)

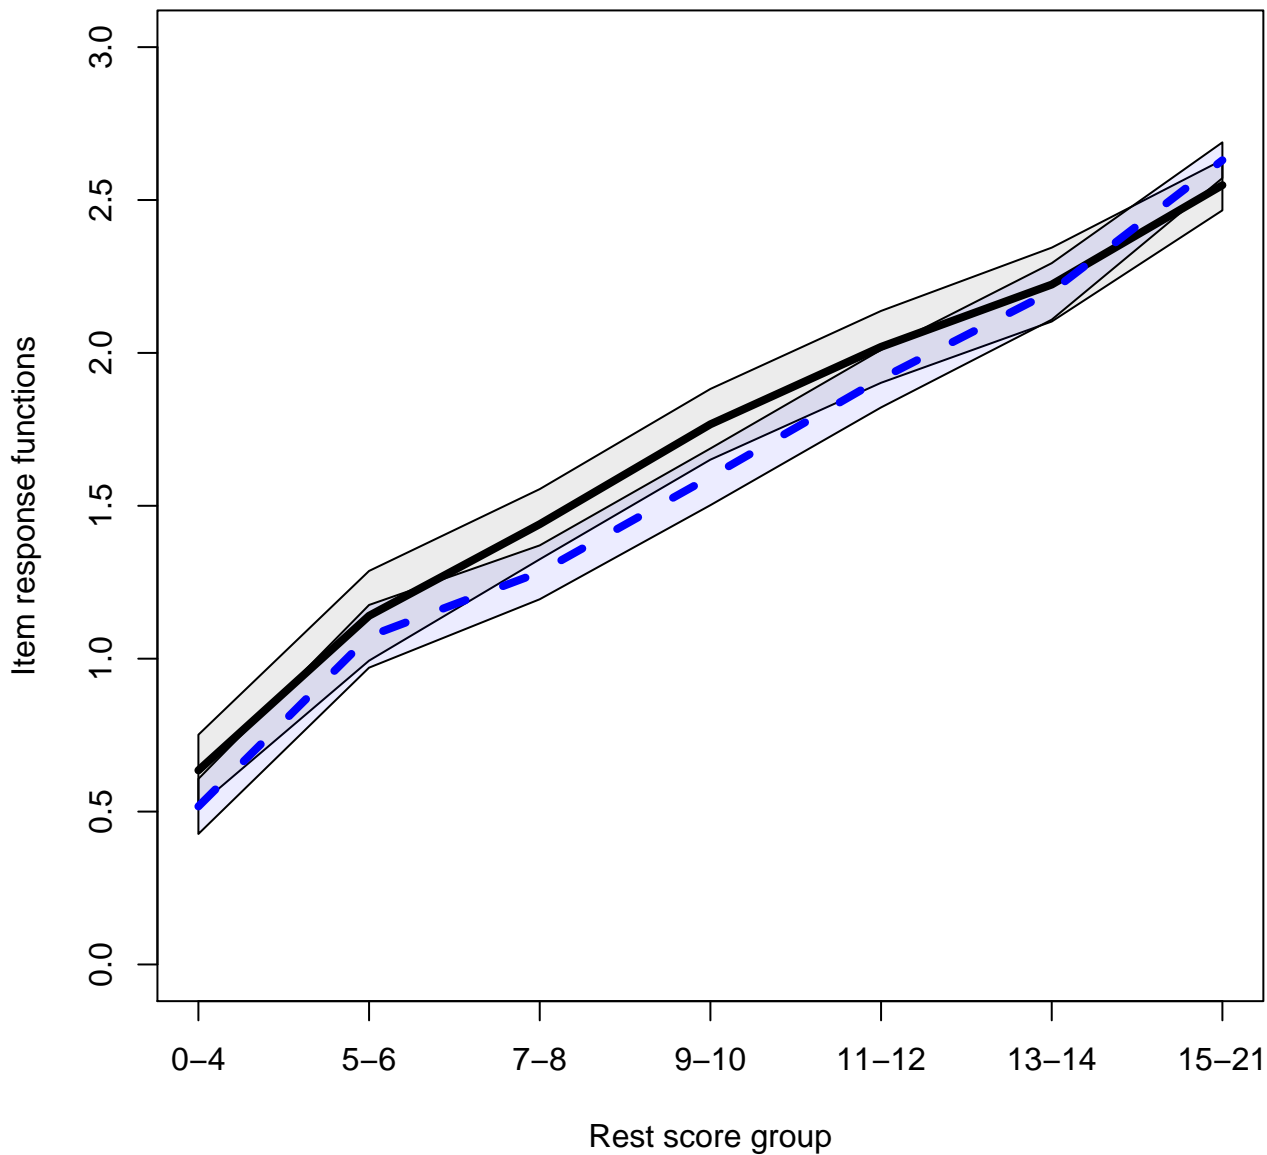



ODI5 (solid) ODI6 (dashed)

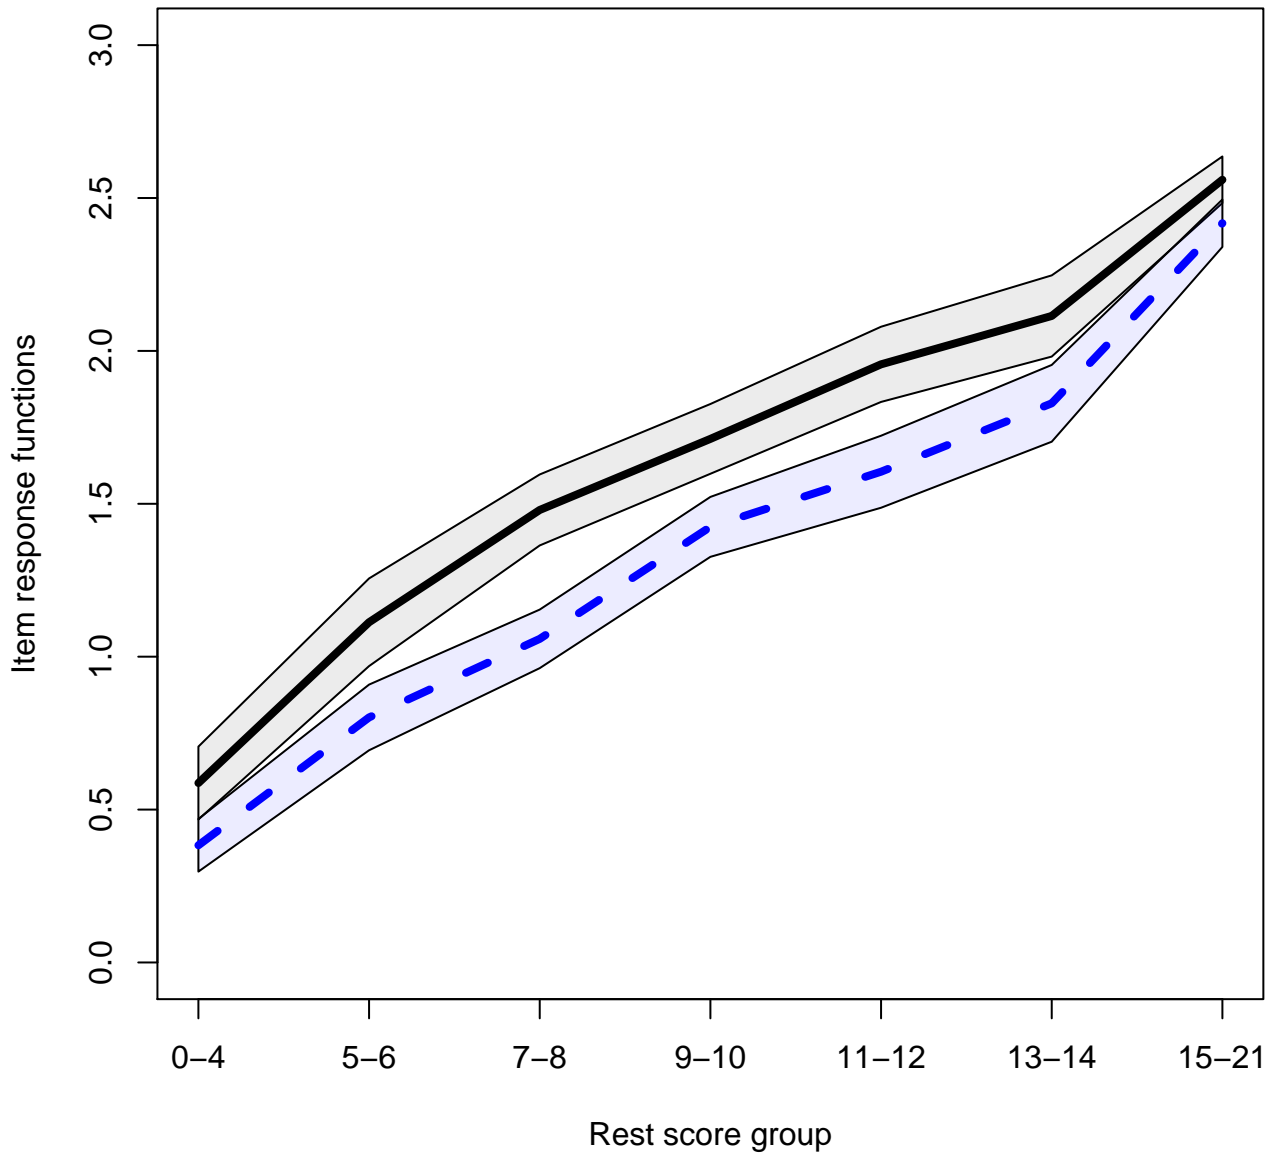

ODI5 (solid) ODI7 (dashed)

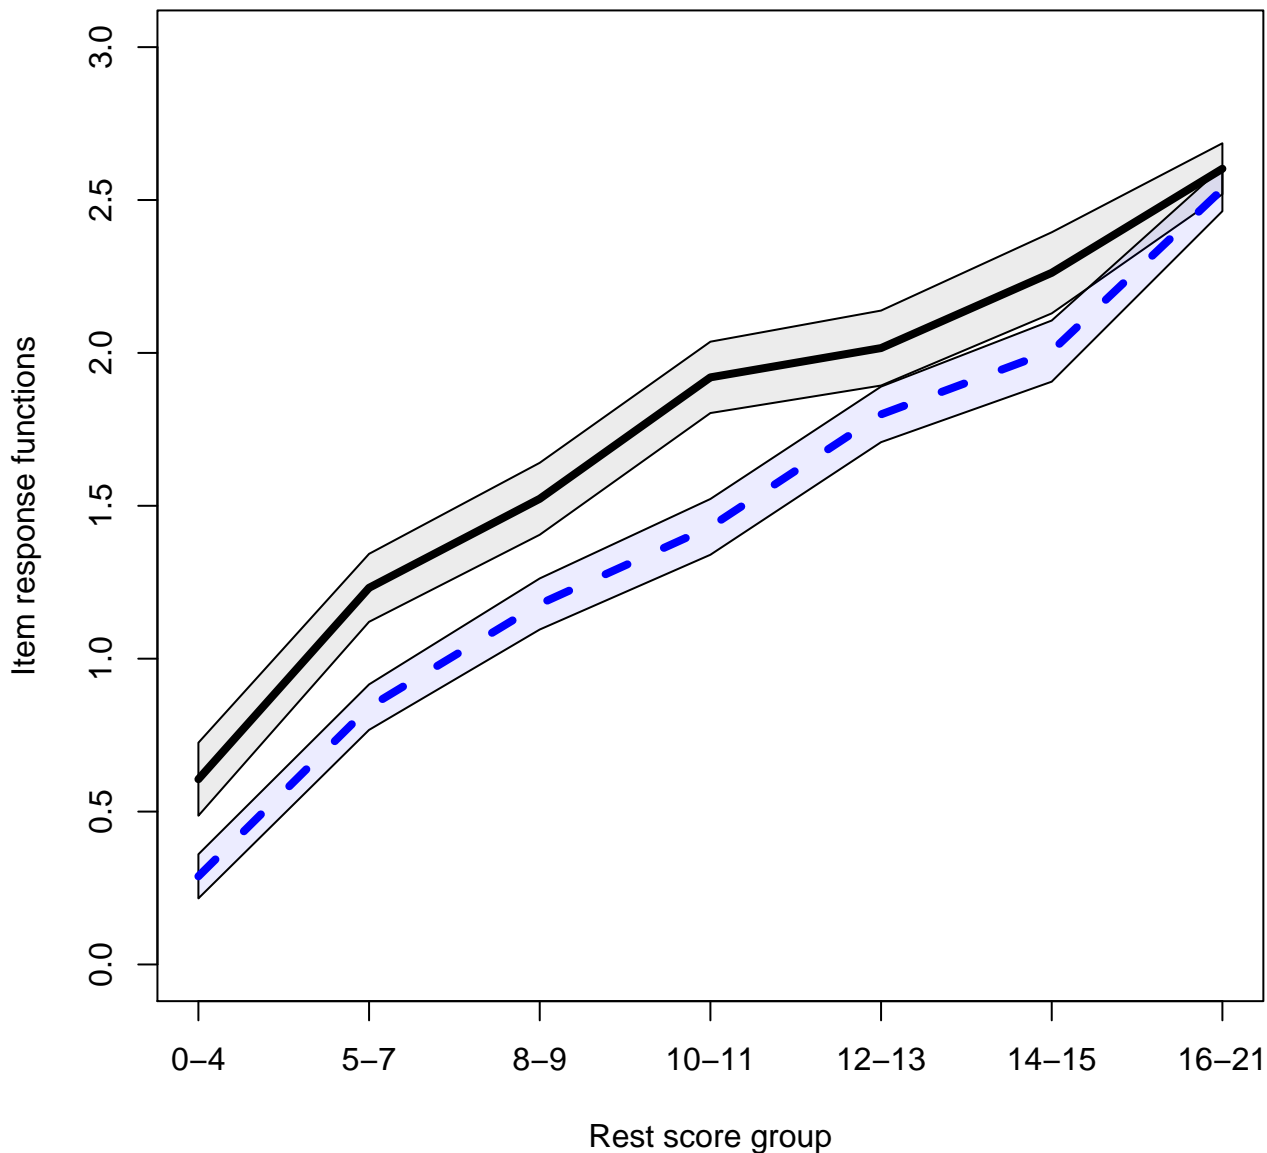

ODI5 (solid) ODI8 (dashed)

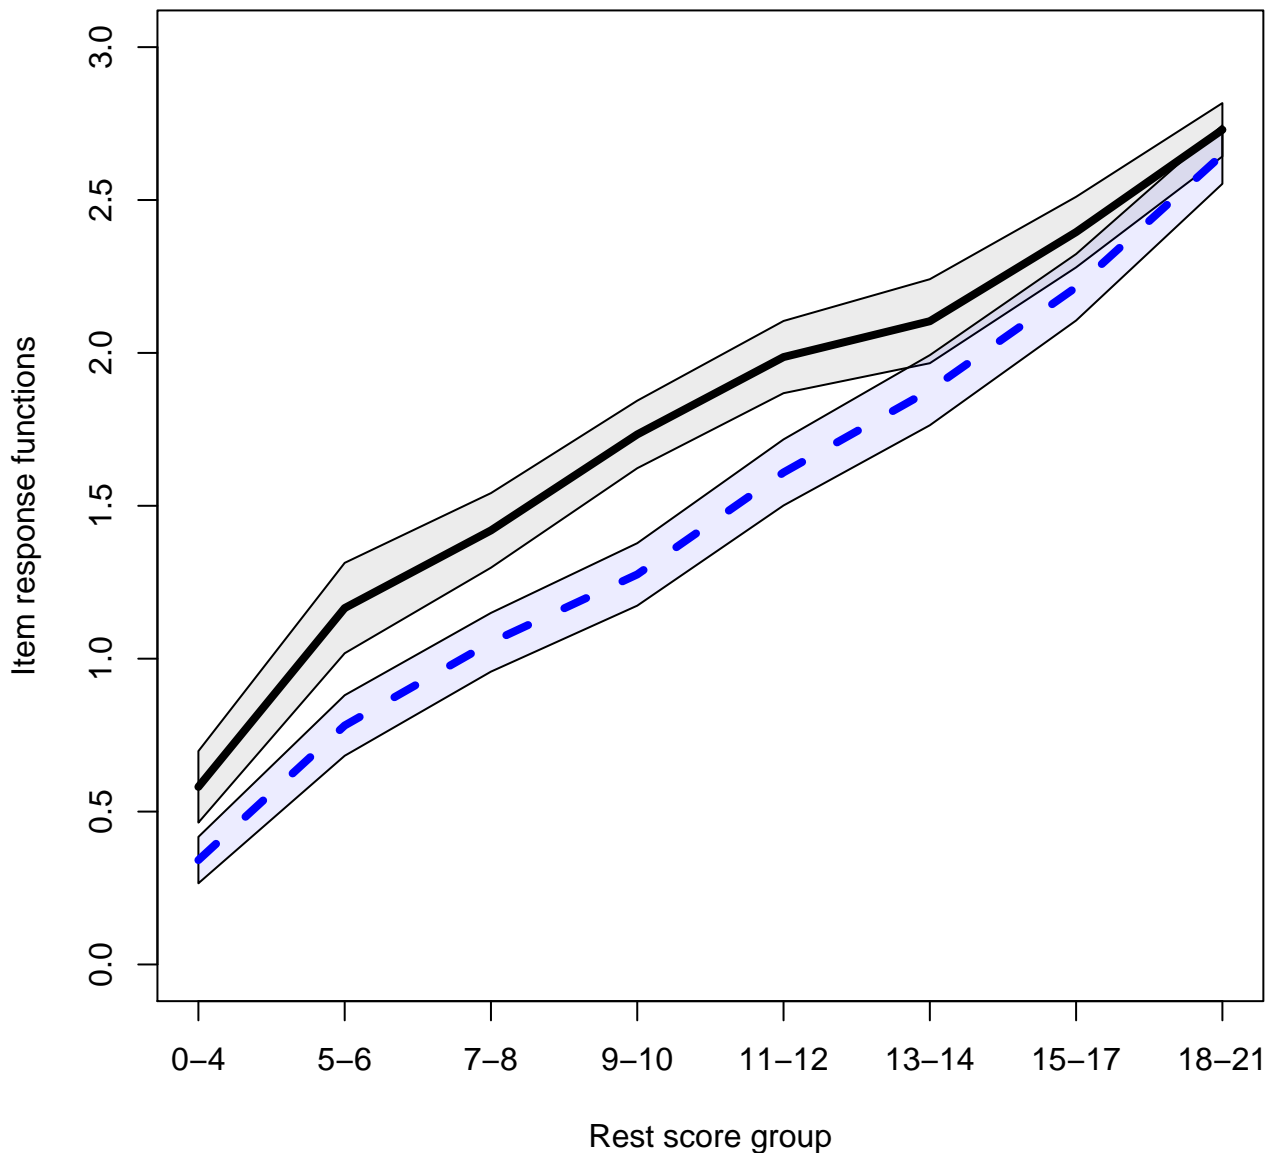

ODI5 (solid) ODI2 (dashed)

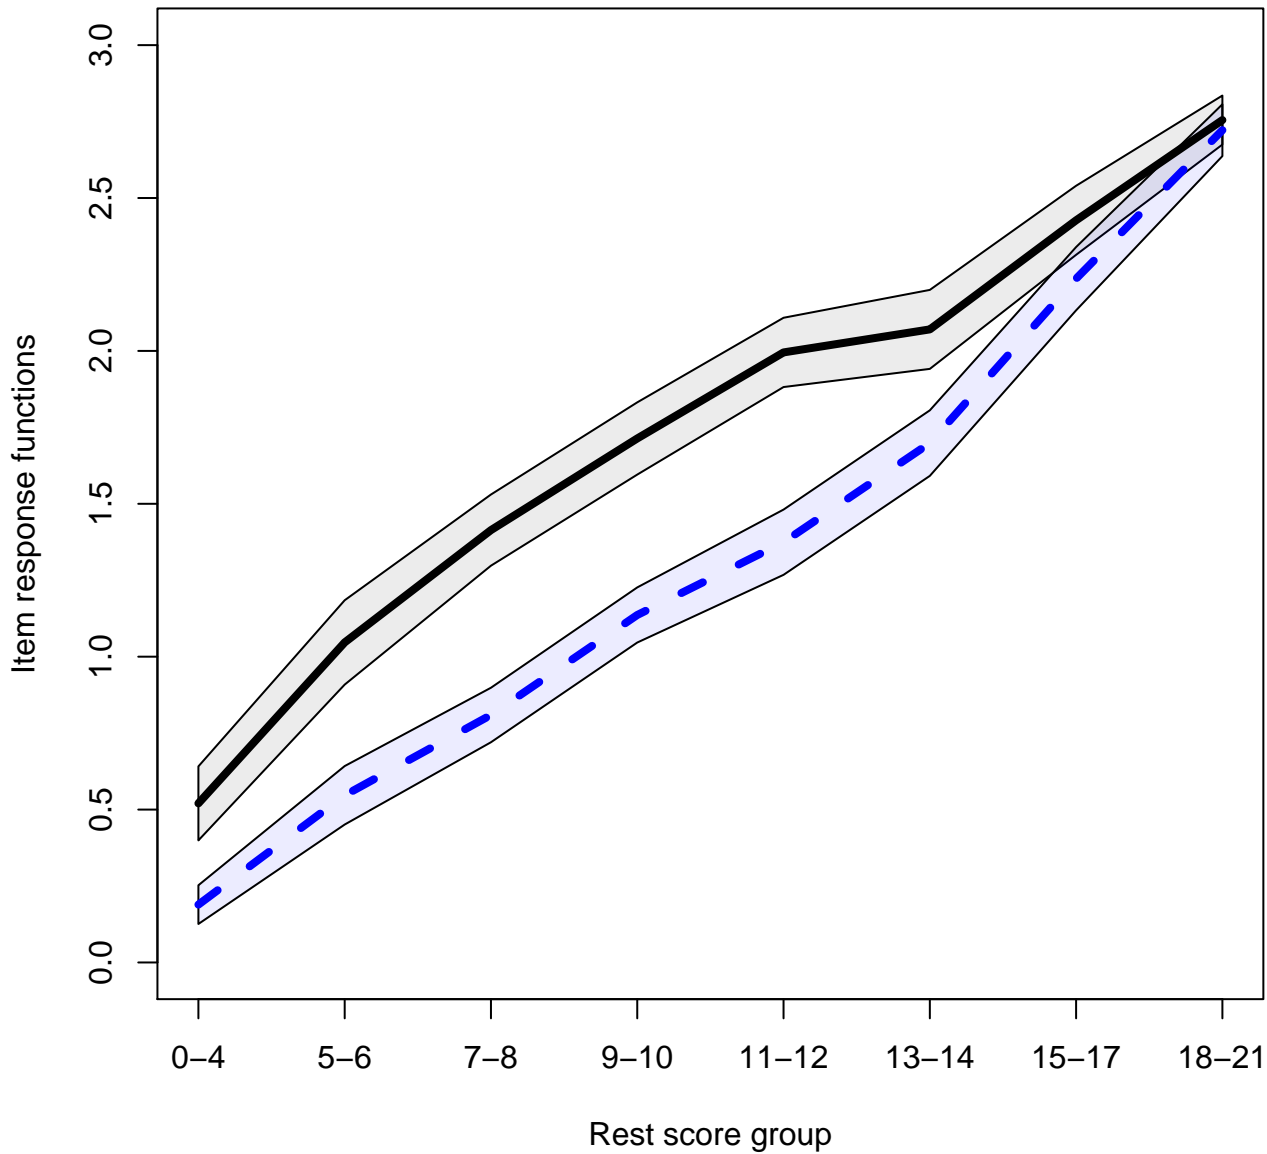

ODI5 (solid) ODI9 (dashed)

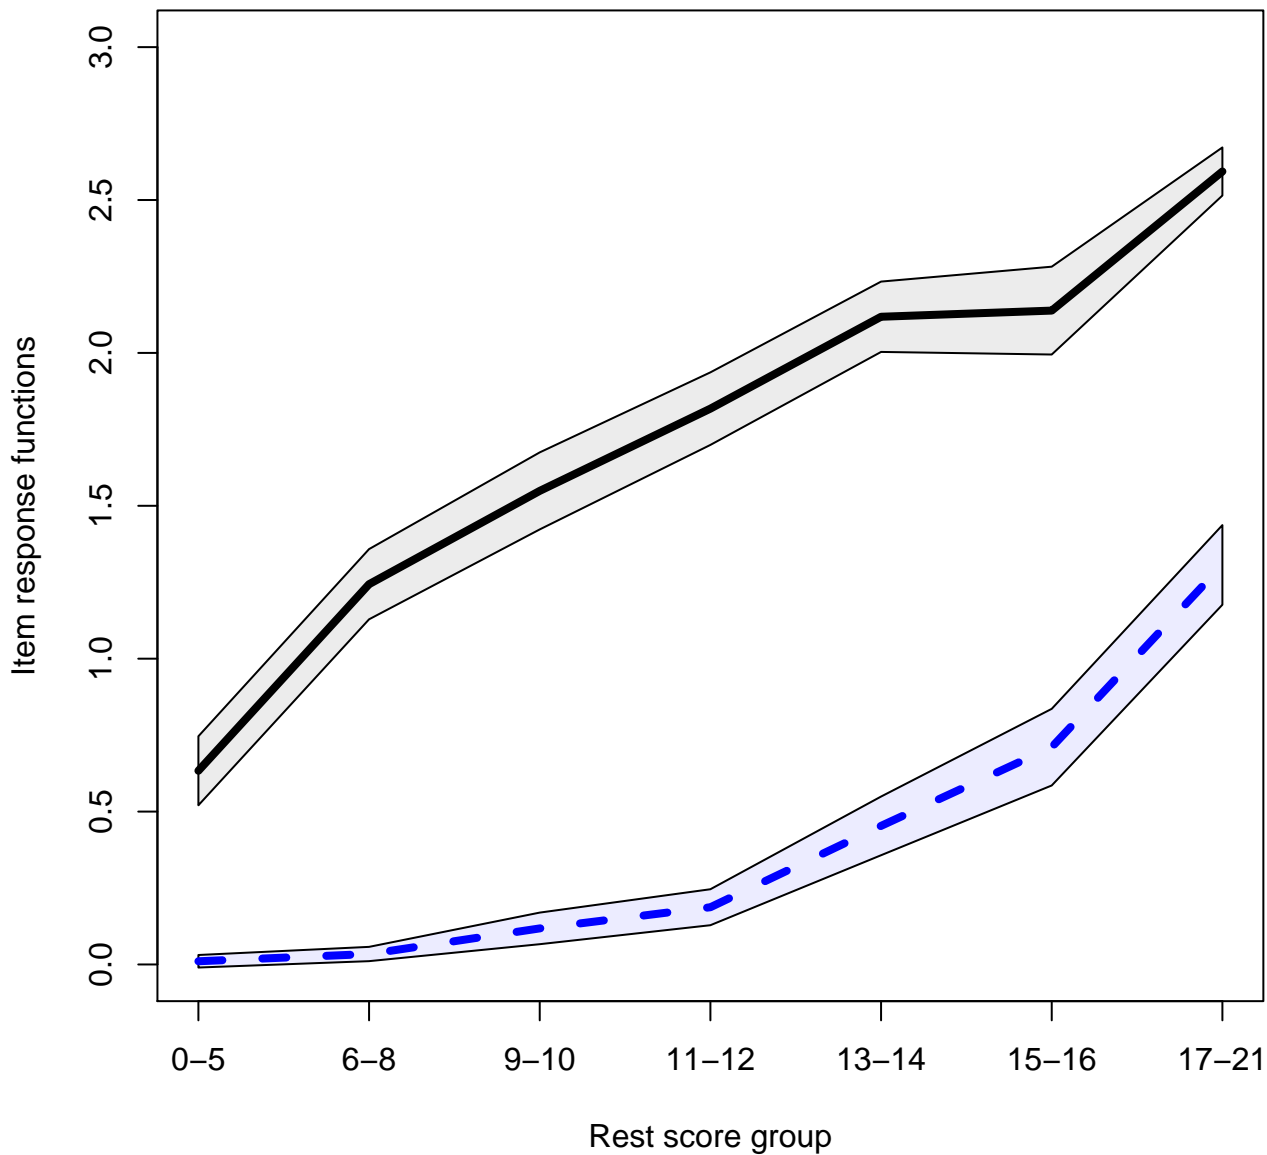

ODI1 (solid) ODI6 (dashed)

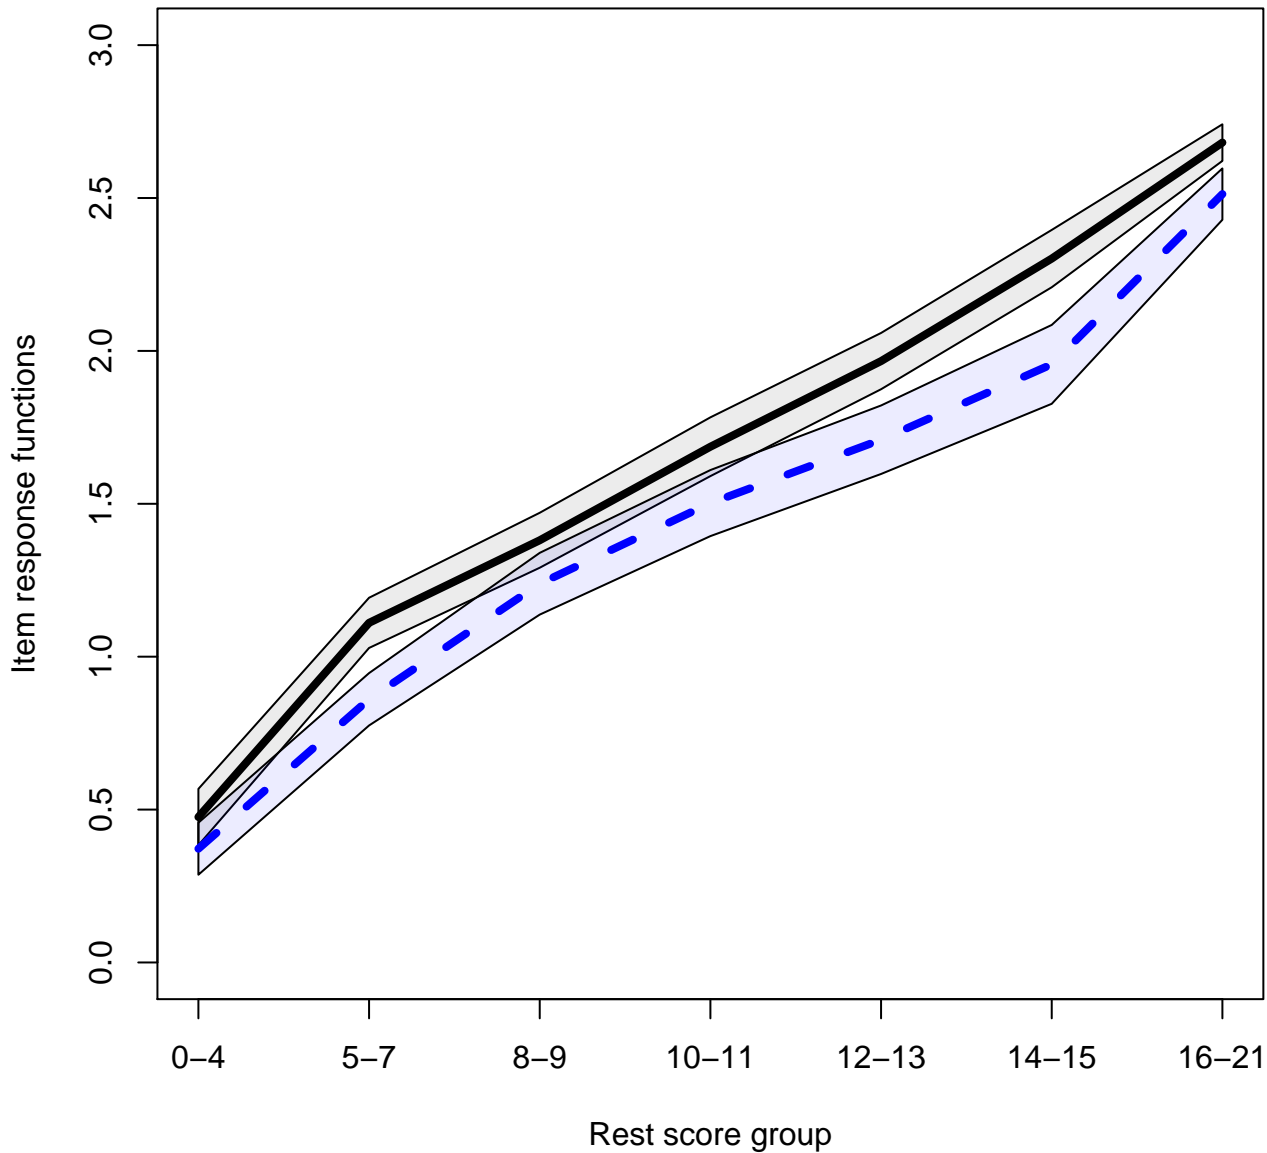

ODI1 (solid) ODI7 (dashed)

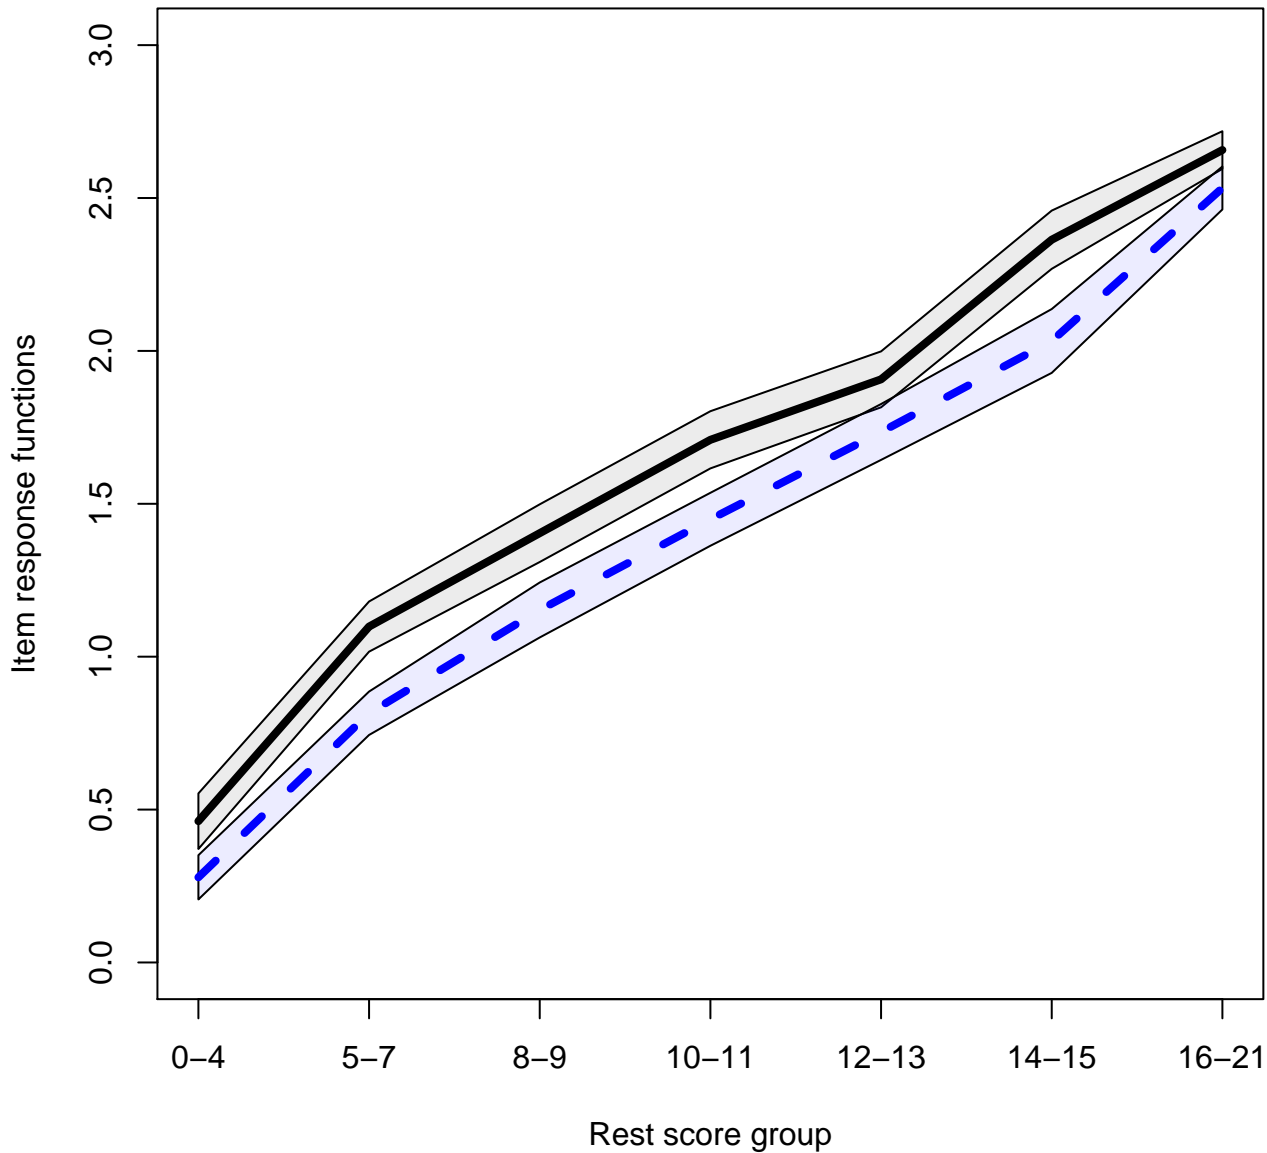

ODI1 (solid) ODI8 (dashed)

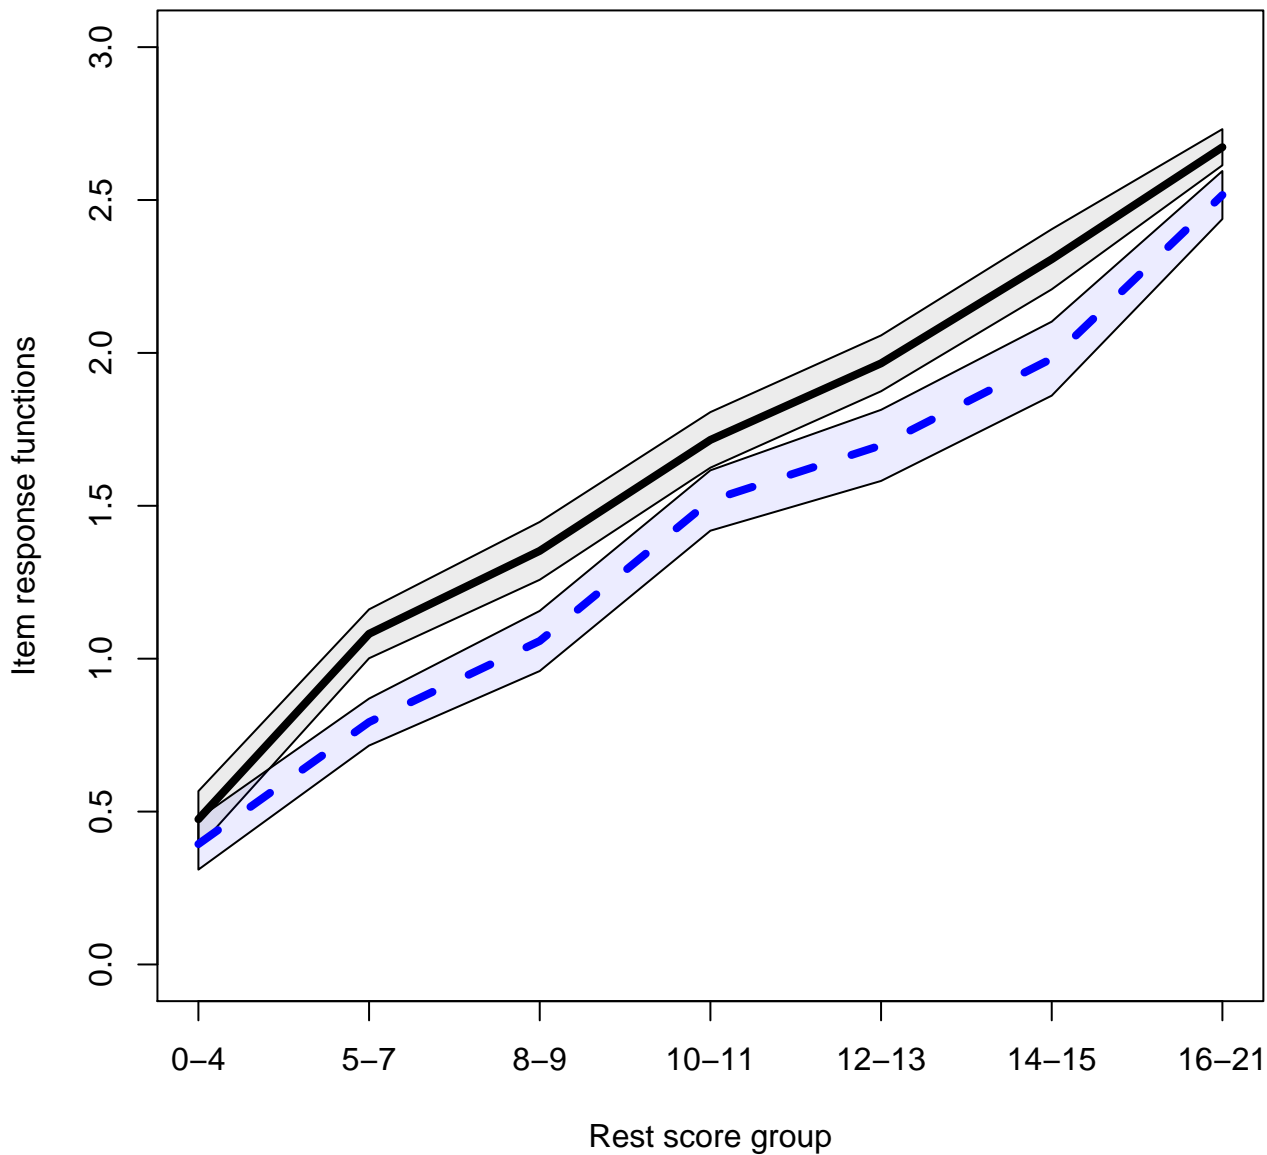



ODI1 (solid) ODI2 (dashed)

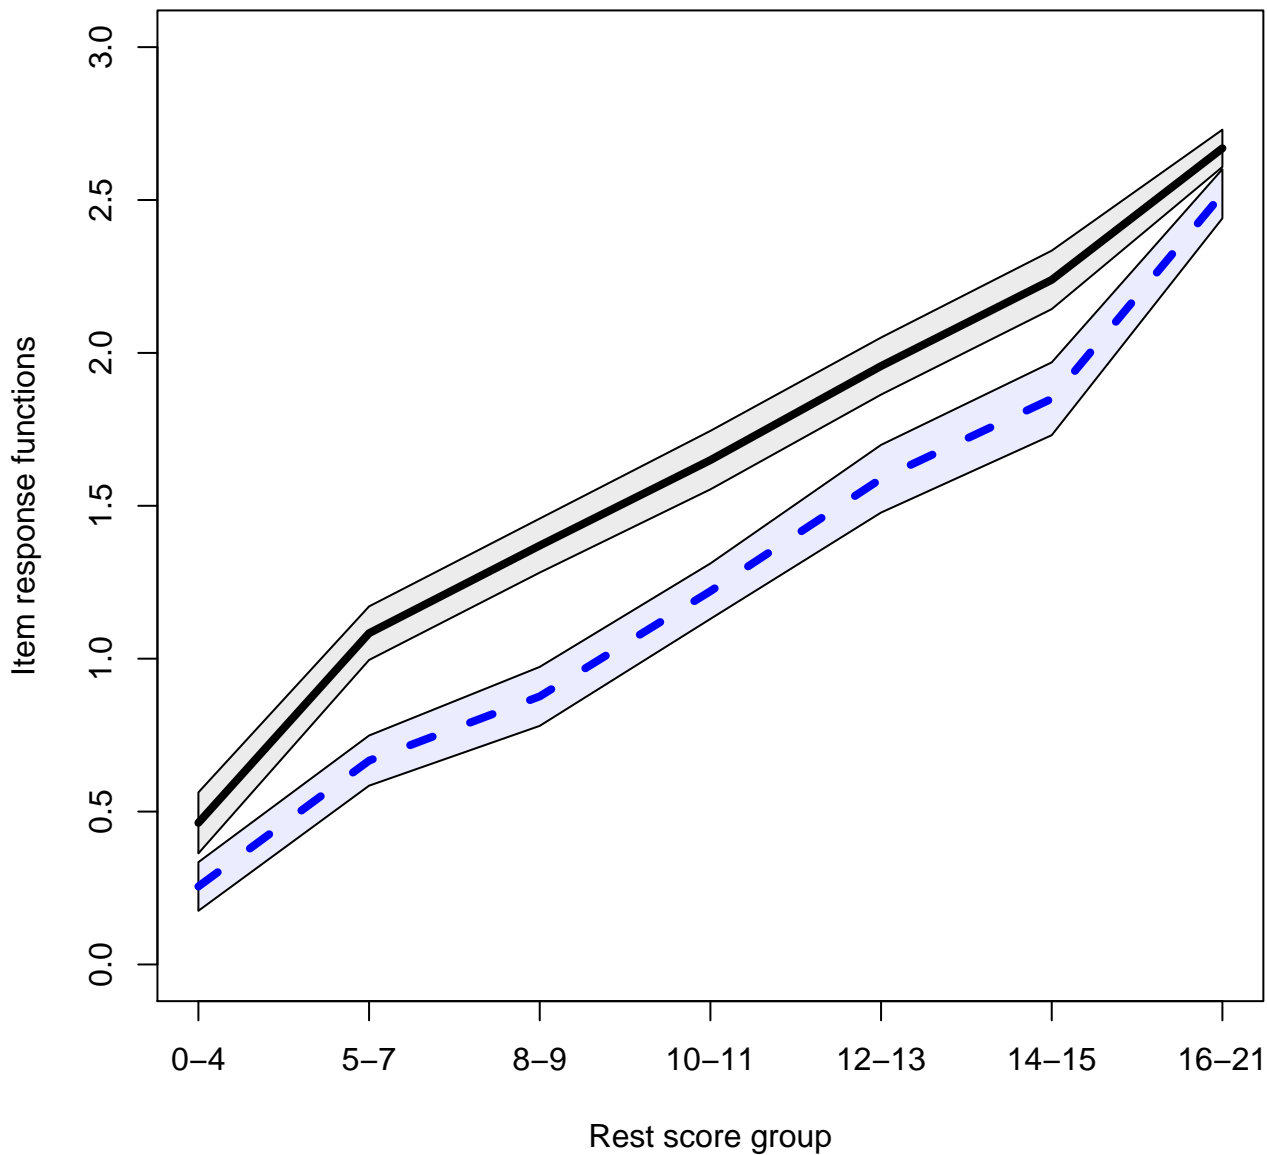

ODI1 (solid) ODI9 (dashed)

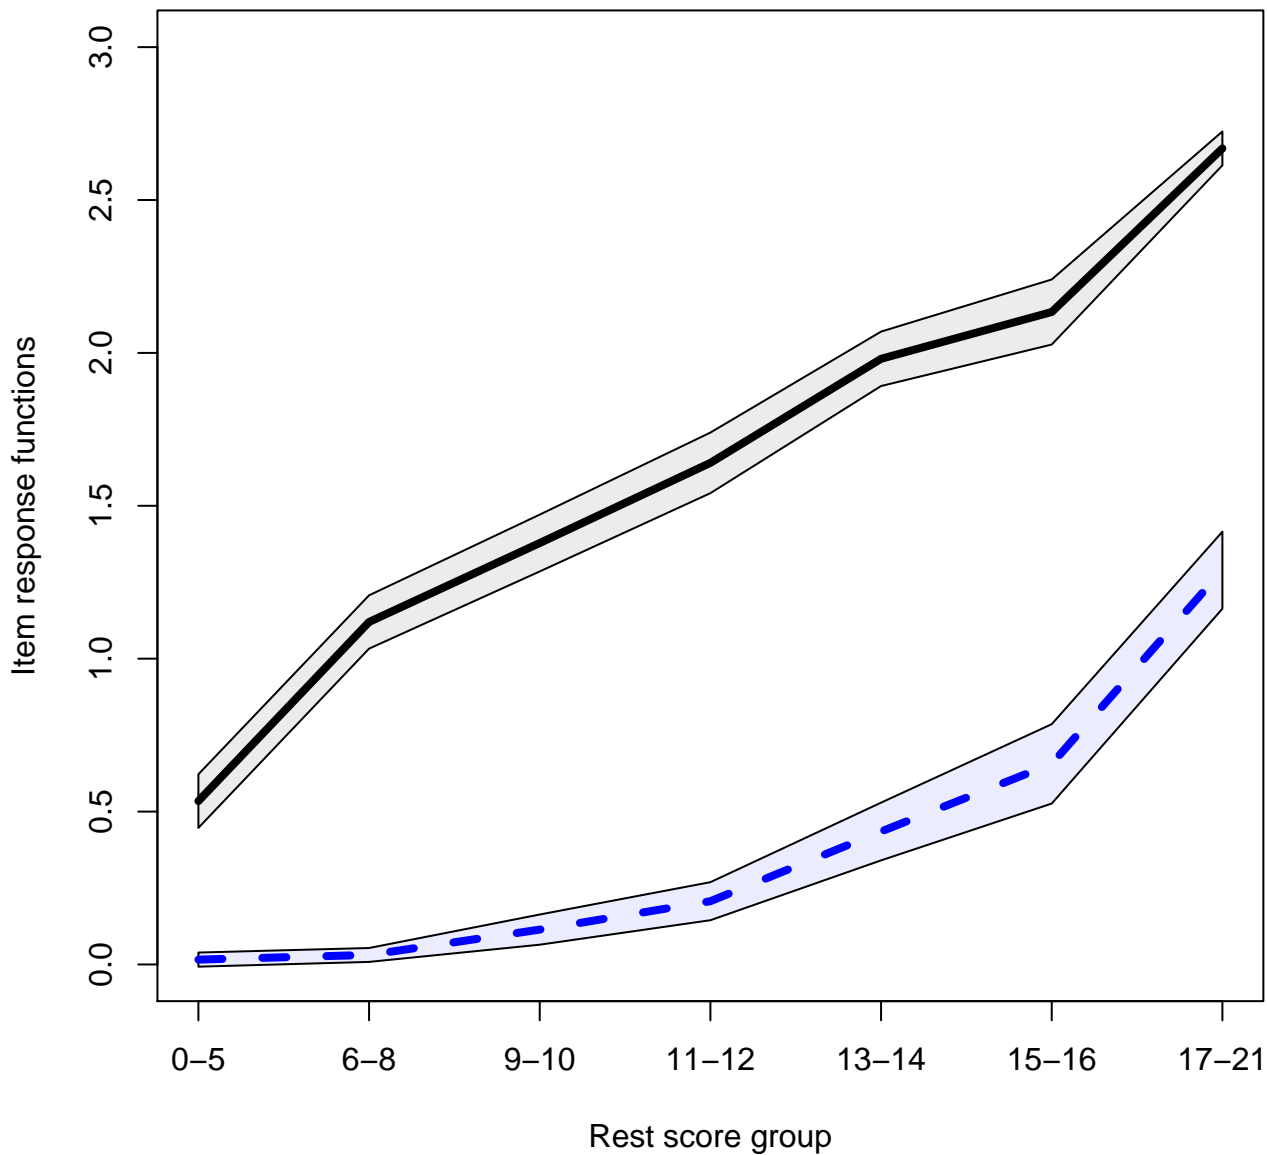

ODI6 (solid) ODI7 (dashed)

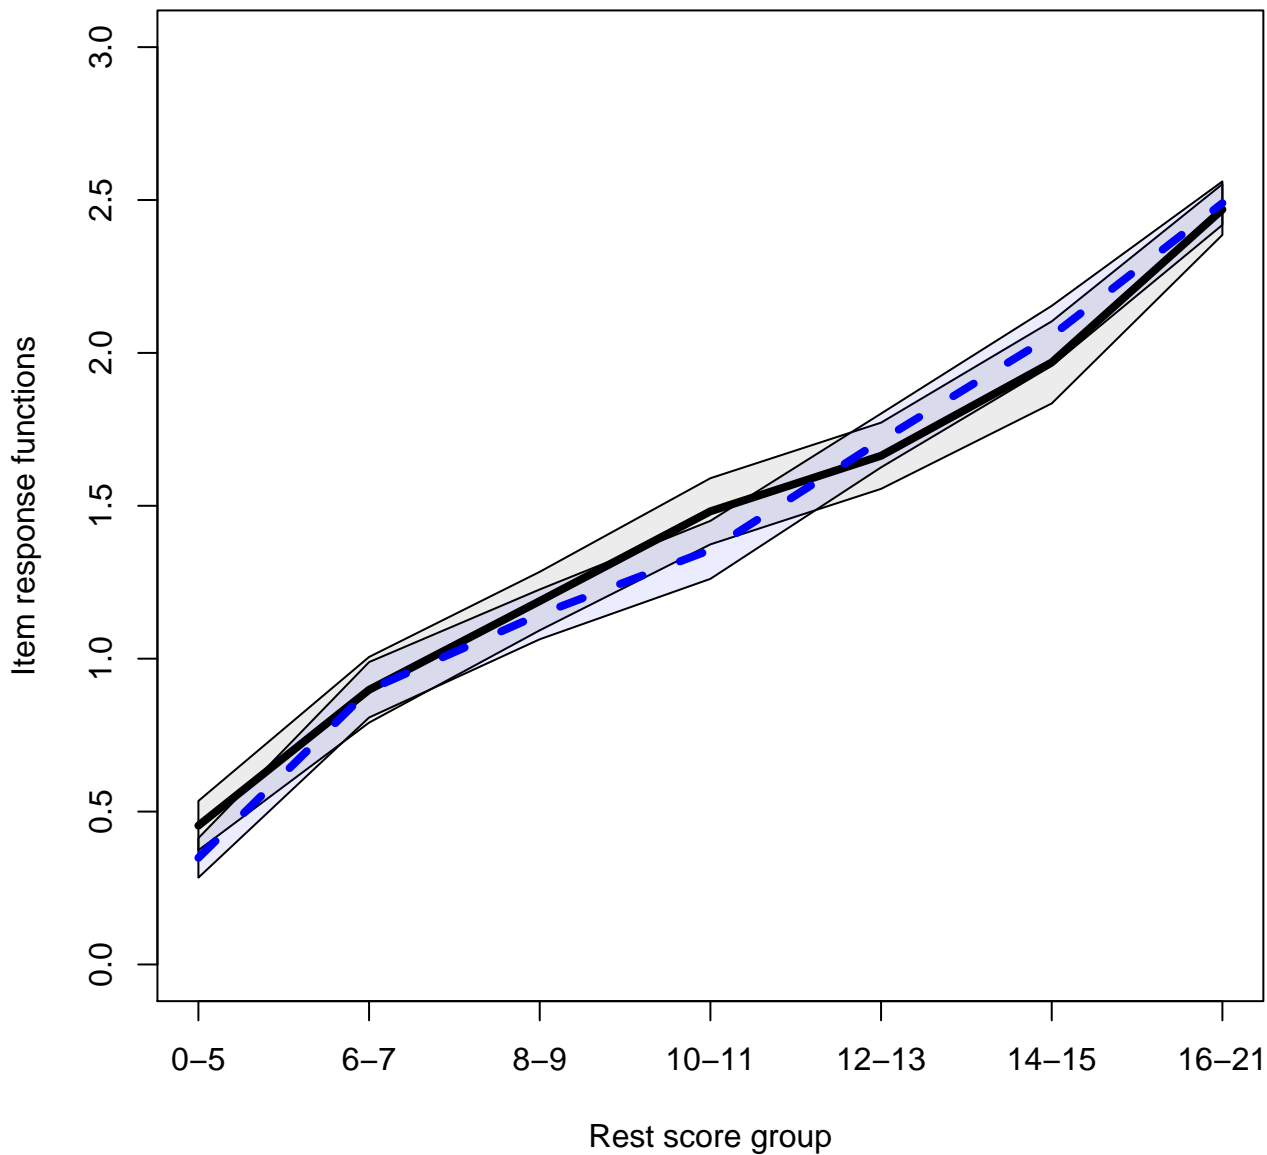

ODI6 (solid) ODI8 (dashed)

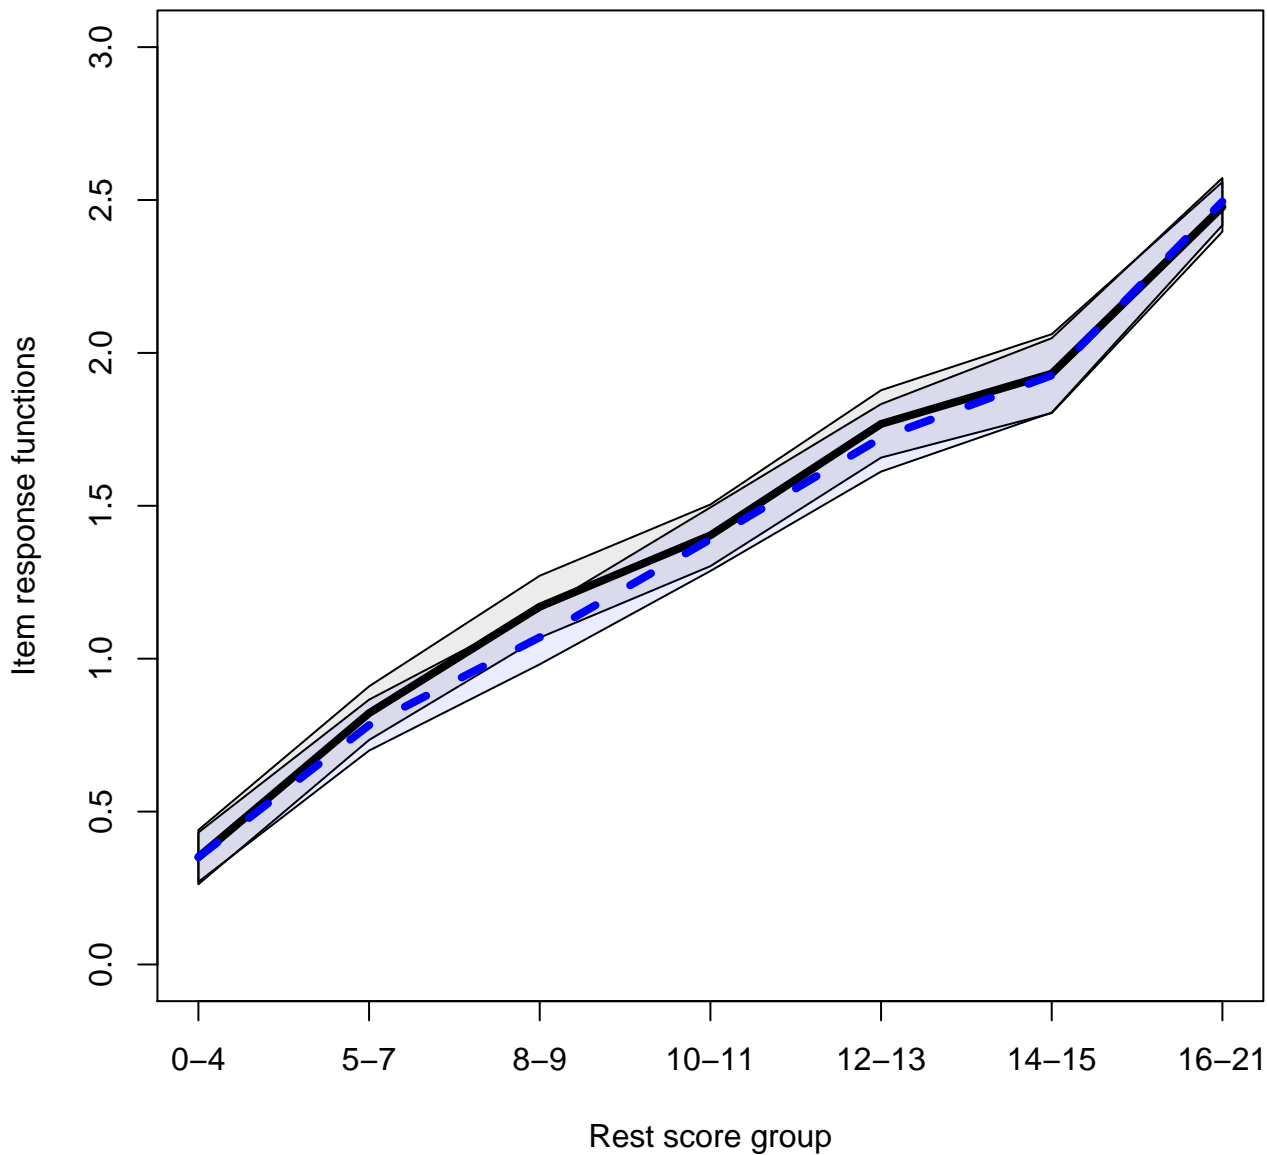

ODI6 (solid) ODI2 (dashed)

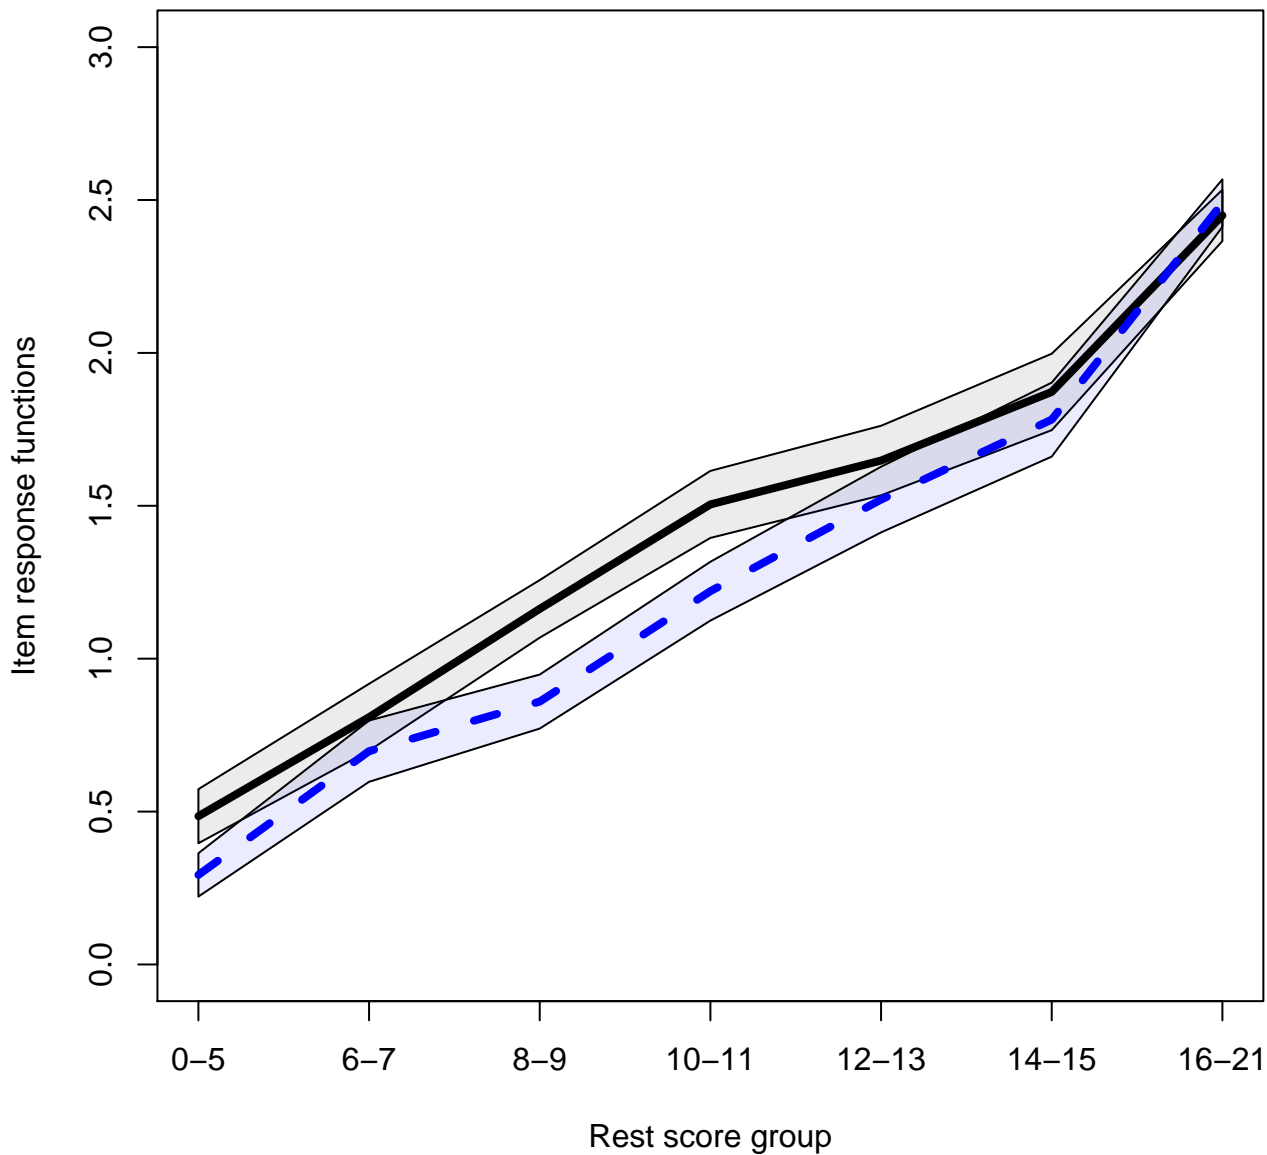

ODI6 (solid) ODI9 (dashed)

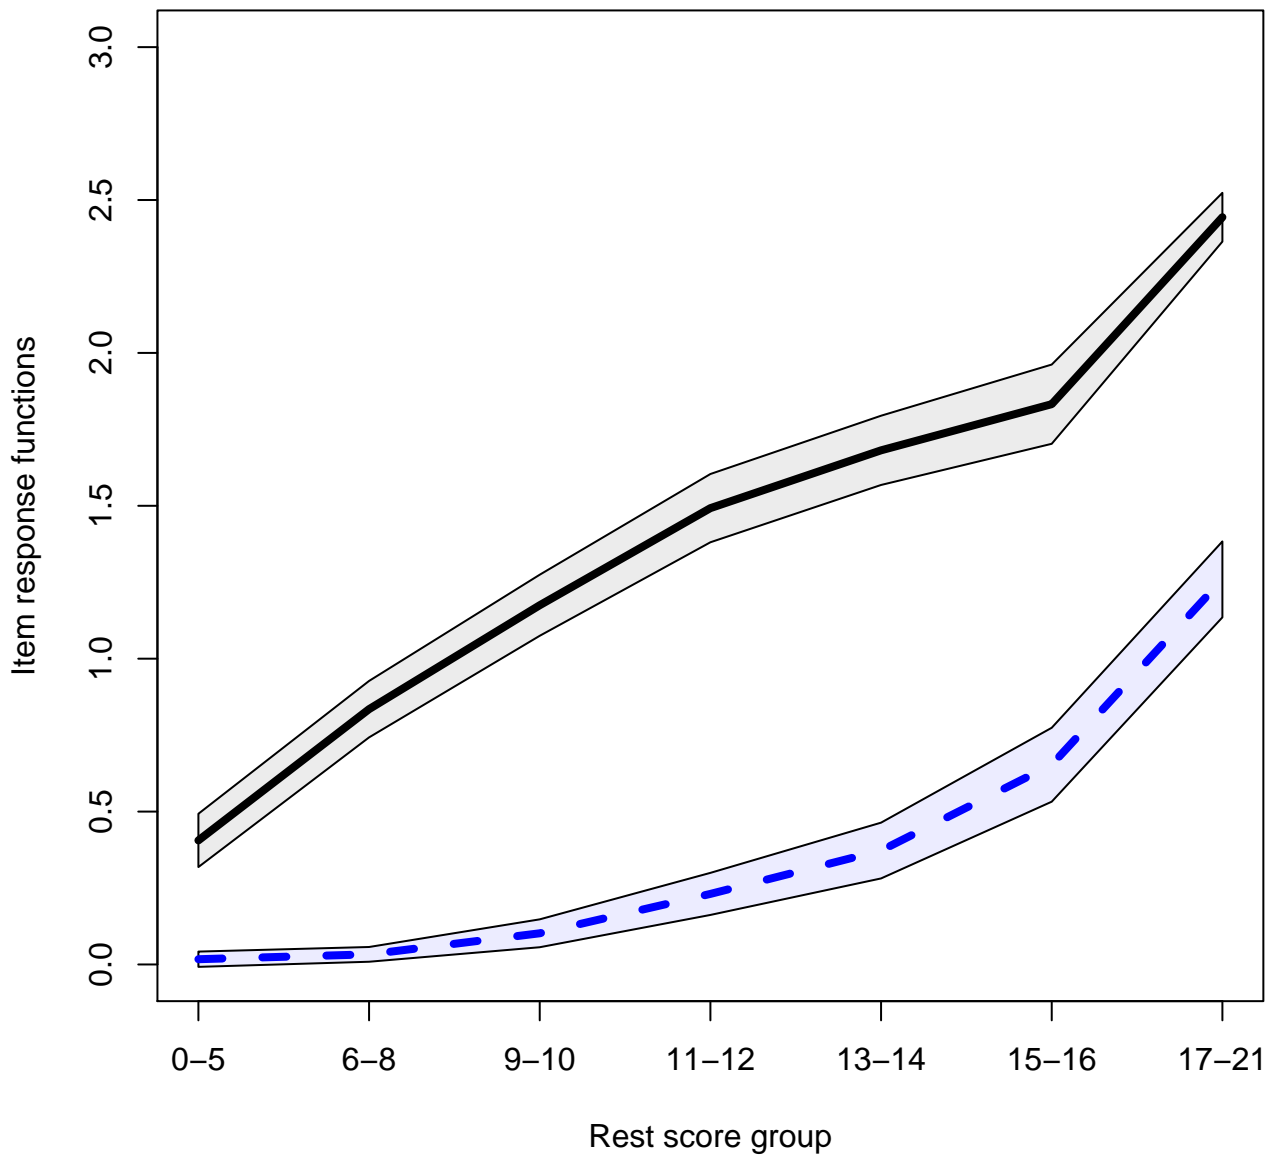

# ODI7 (solid) ODI8 (dashed)

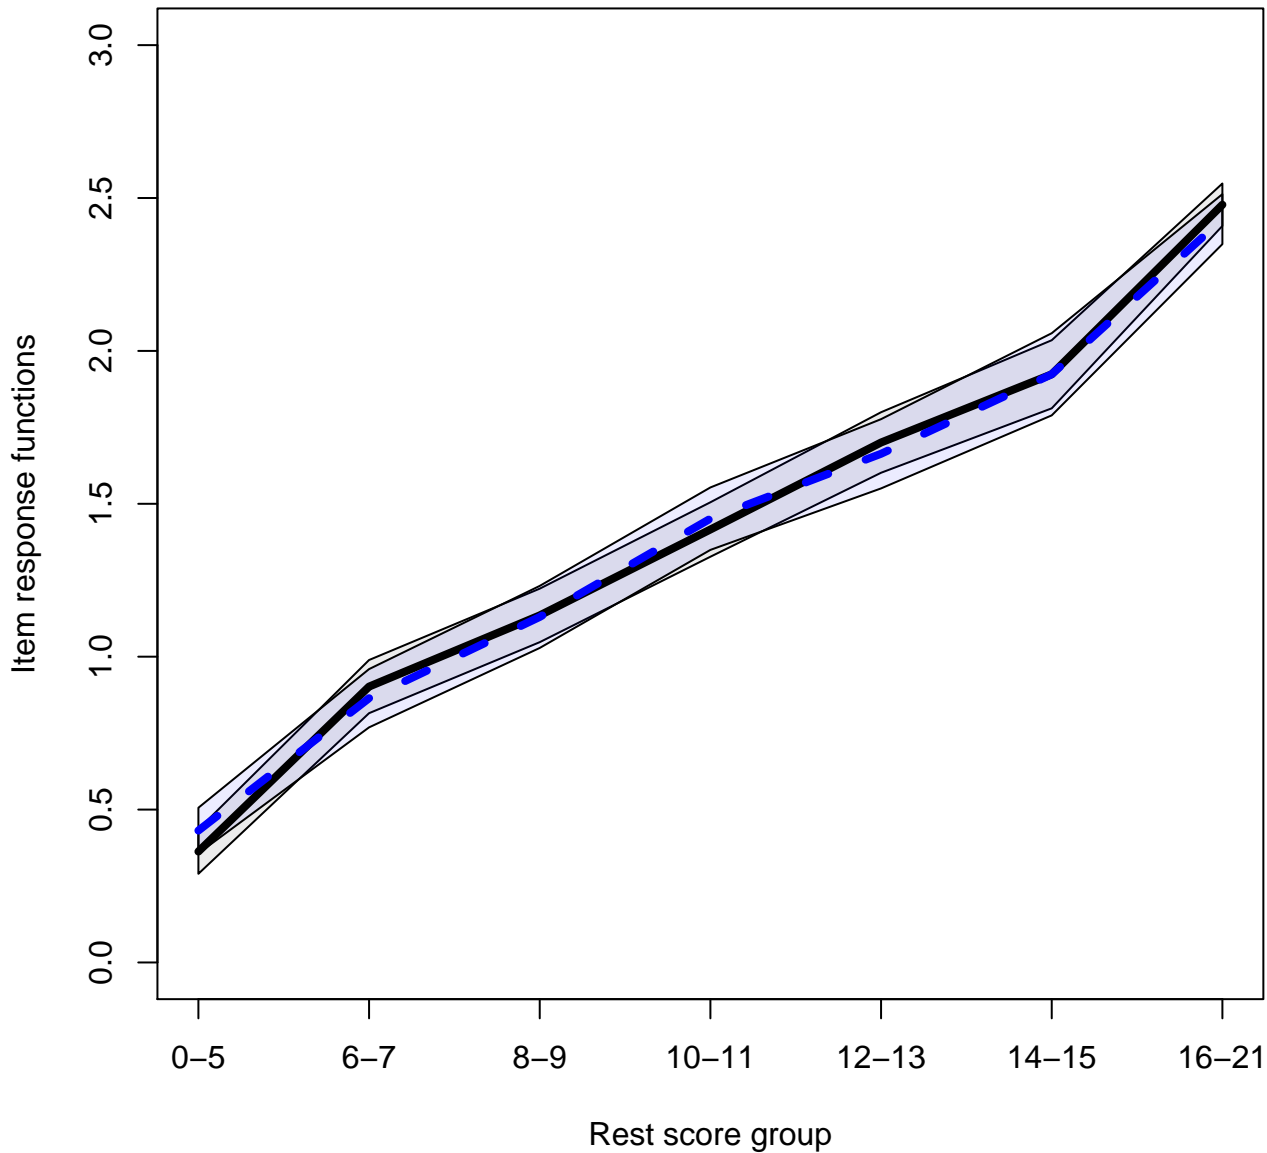

ODI7 (solid) ODI2 (dashed)

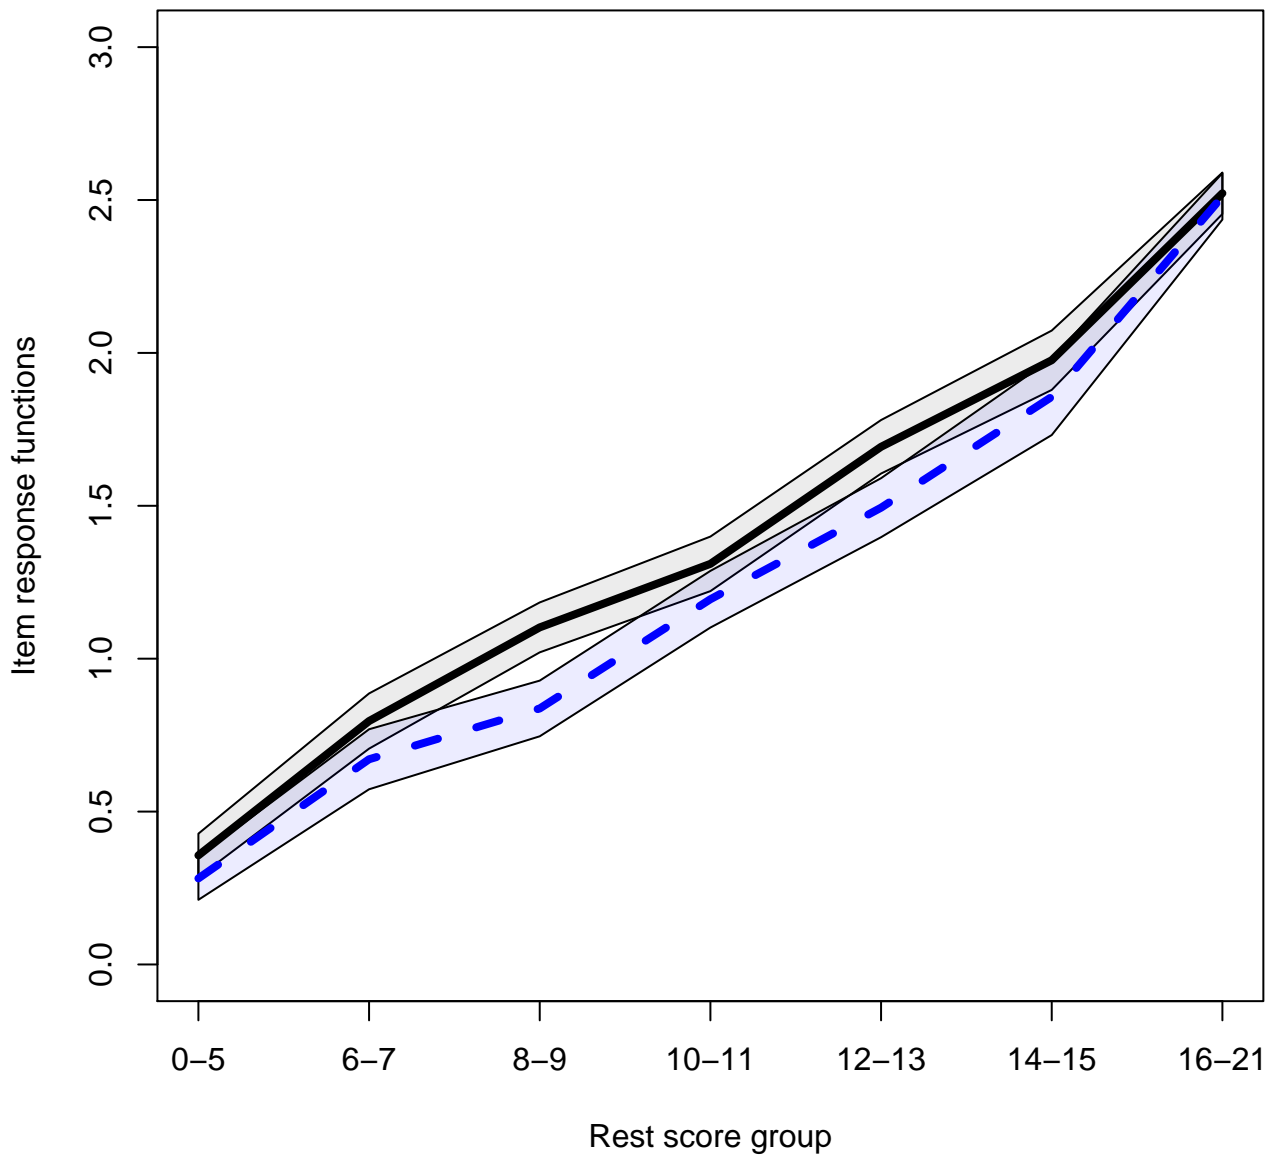



ODI7 (solid) ODI9 (dashed)

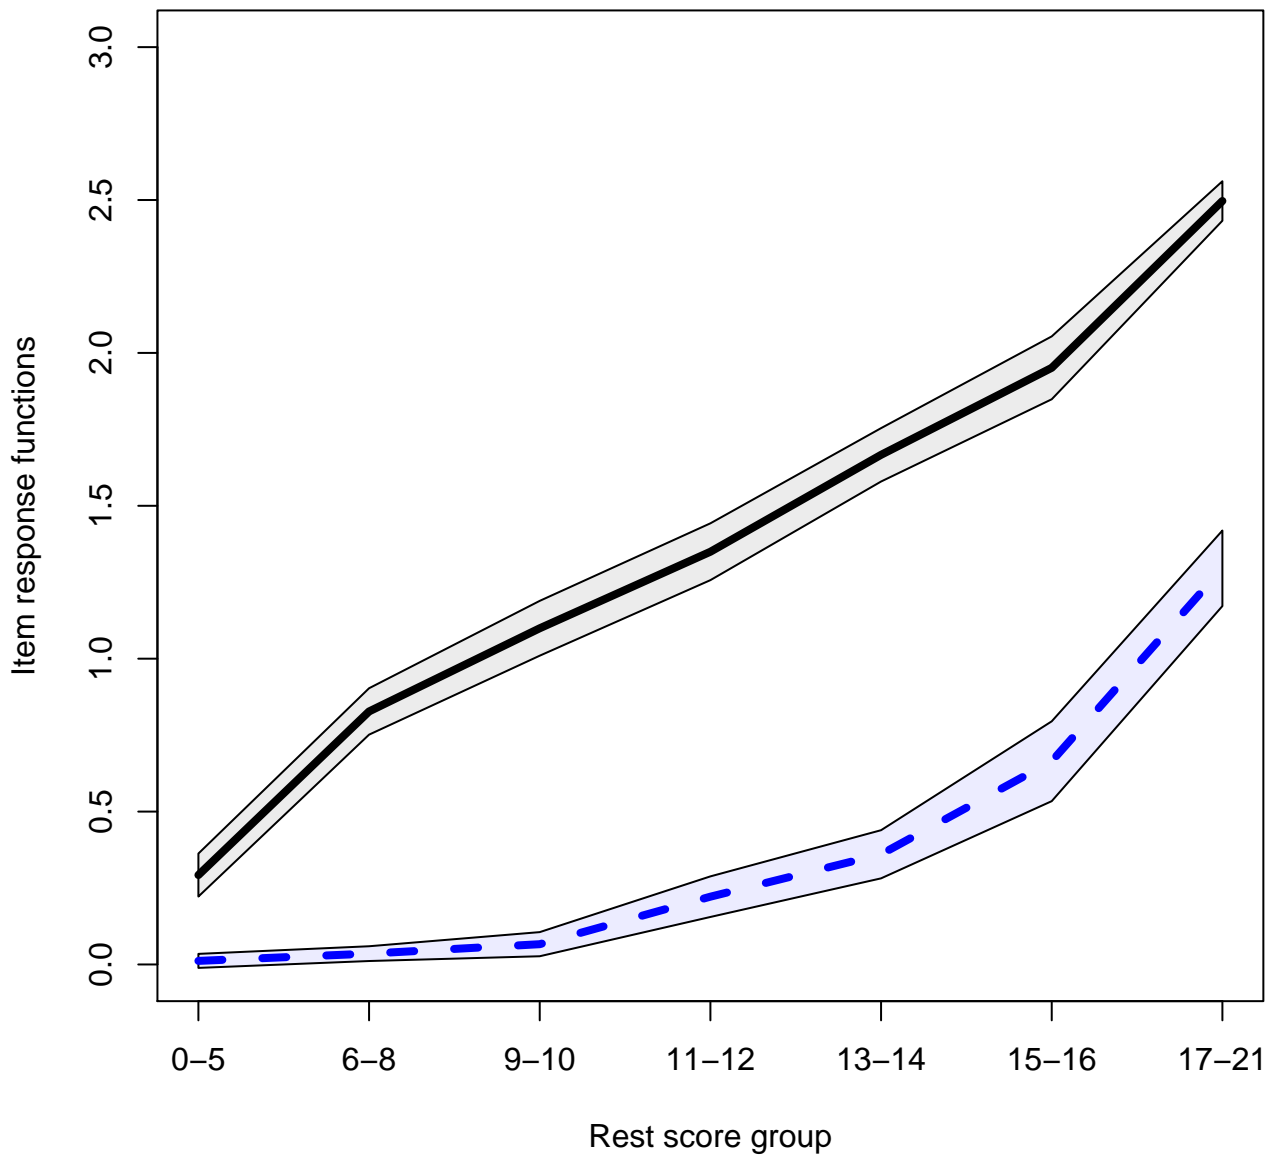

ODI8 (solid) ODI2 (dashed)

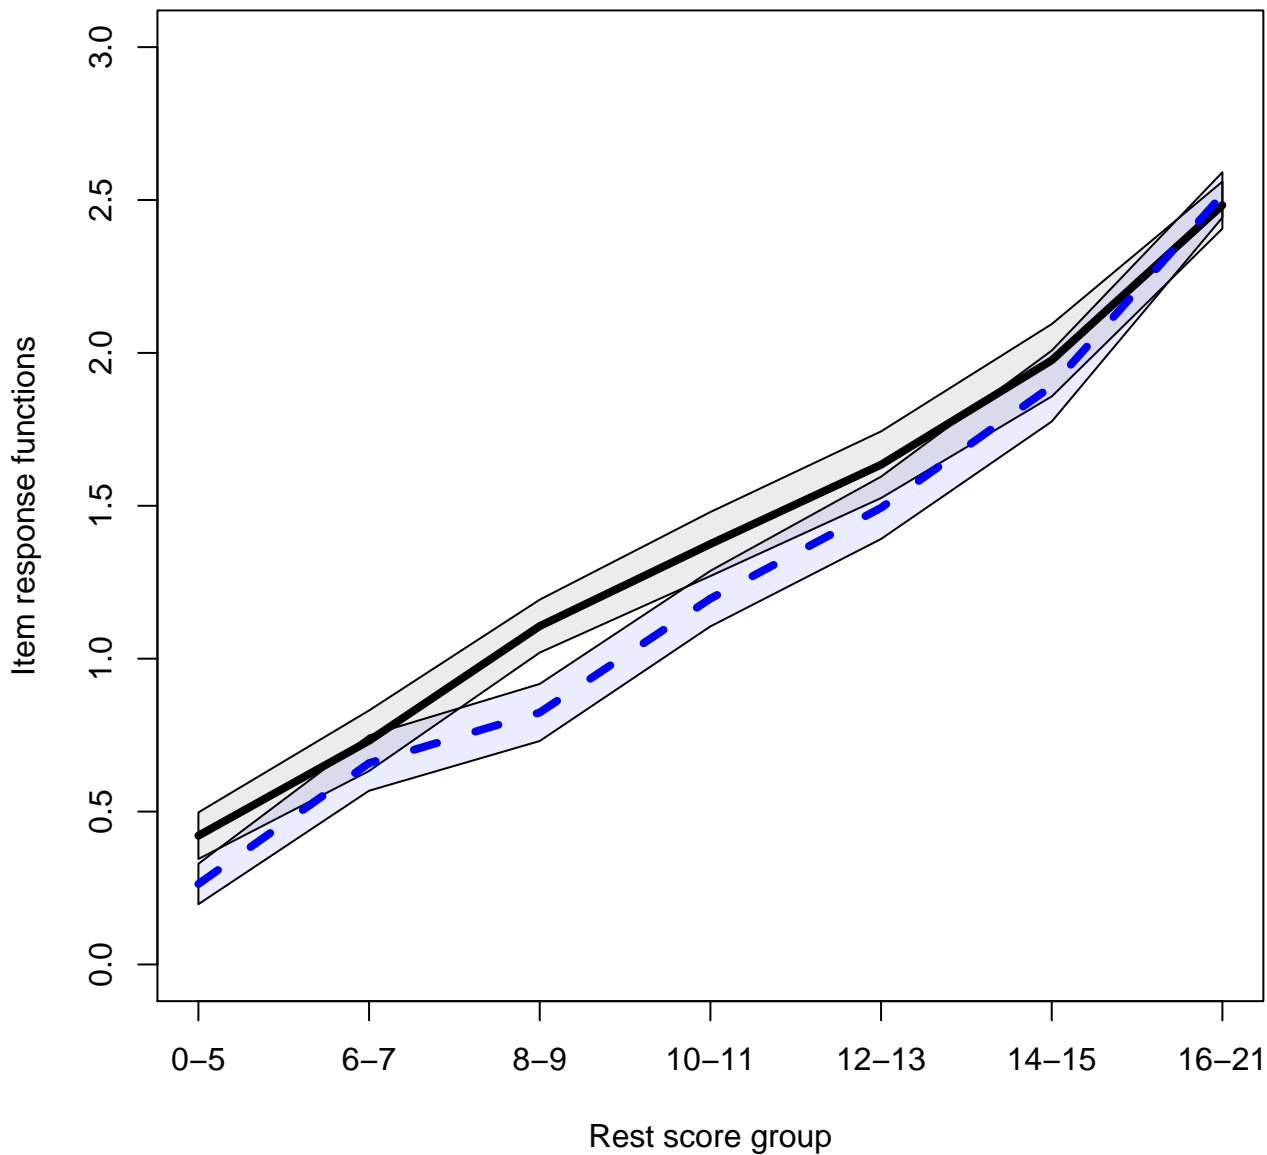

ODI8 (solid) ODI9 (dashed)

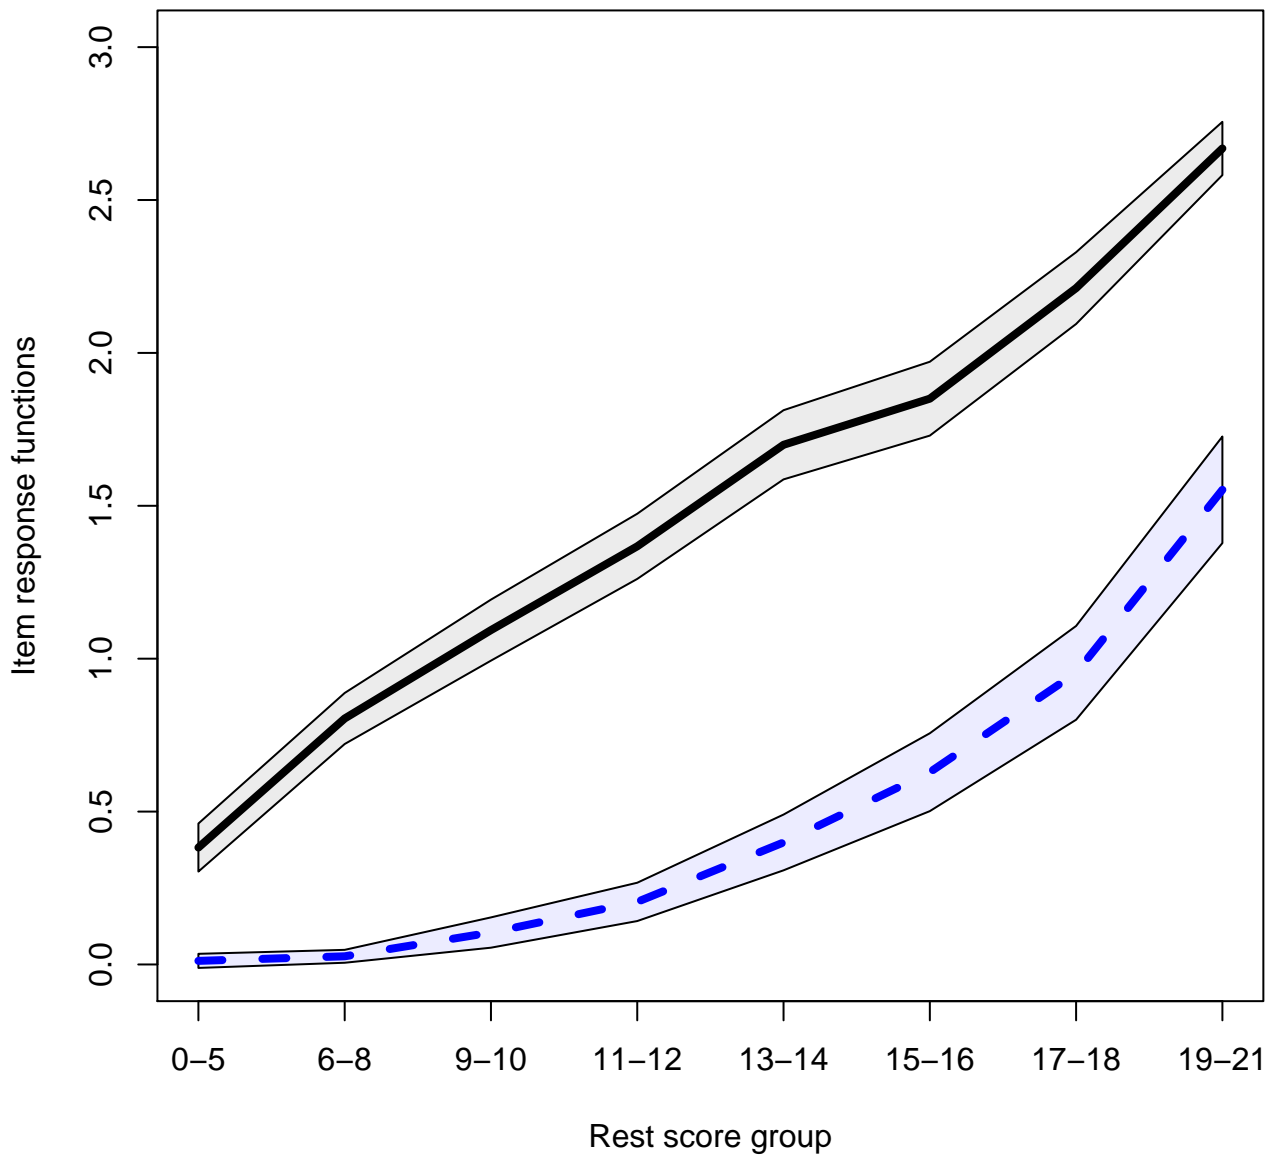

ODI2 (solid) ODI9 (dashed)

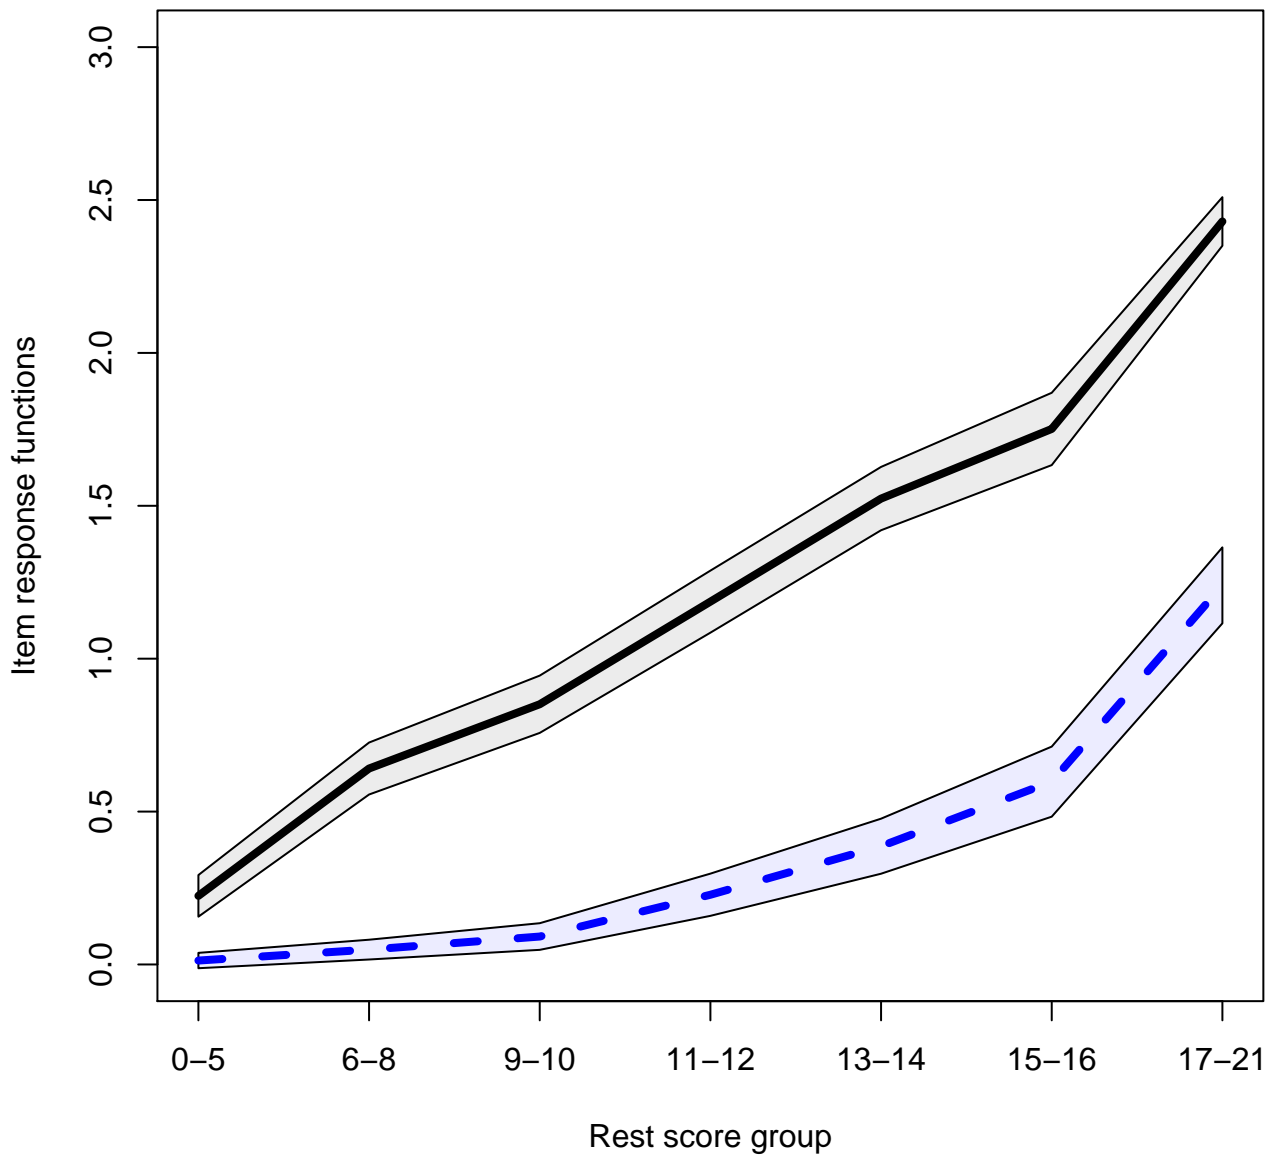

Supplement: SMI-39-137-s001.pdf [file SMI-39-137-s001.pdf]
