# Supplementary material for: Towards a new approach to job‐related distress: A three‐sample study of the Occupational Depression Inventory
Source: PubMed Central journal article supplement — Stress Health. 2022 Jun 20;39(1):137–53. doi: 10.1002/smi.3177 (PMC10084211; doi:10.1002/smi.3177), 2022-06-20

Supplemental Figure 2. Monotonicity analysis of the Swiss sample.

**ODI1**

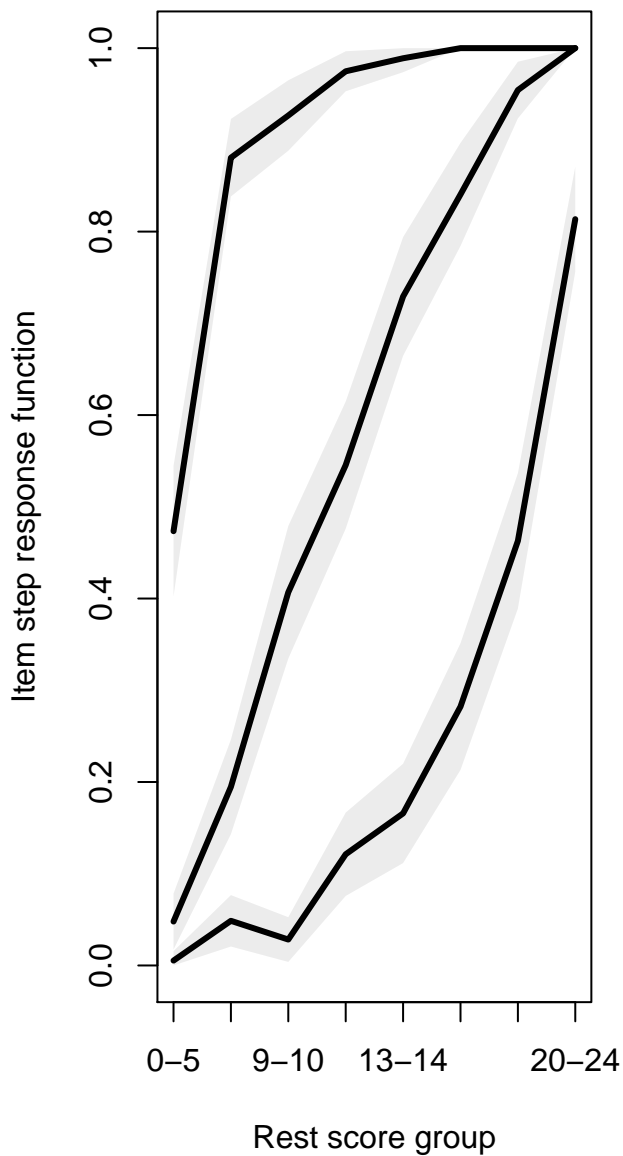

**ODI1**

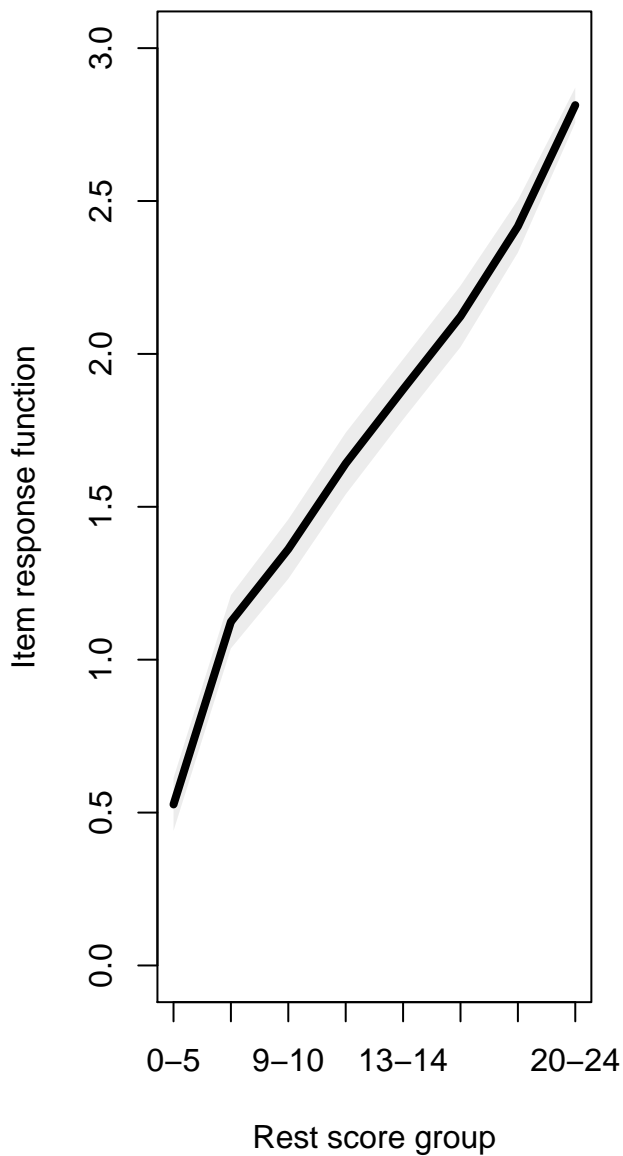

**ODI2**

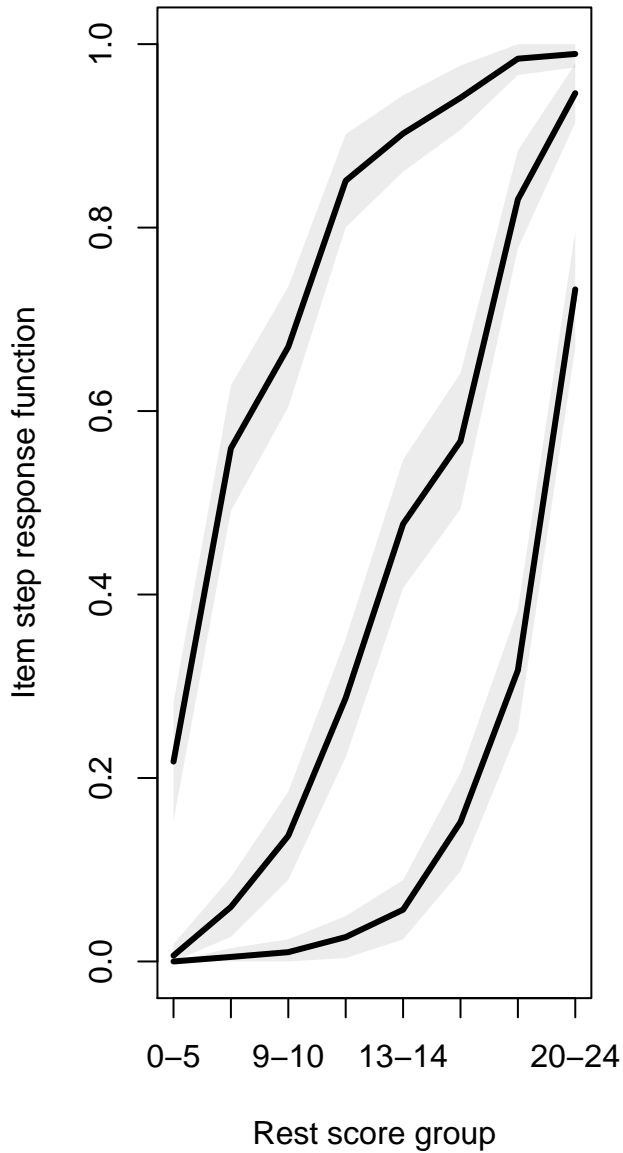

**ODI2**

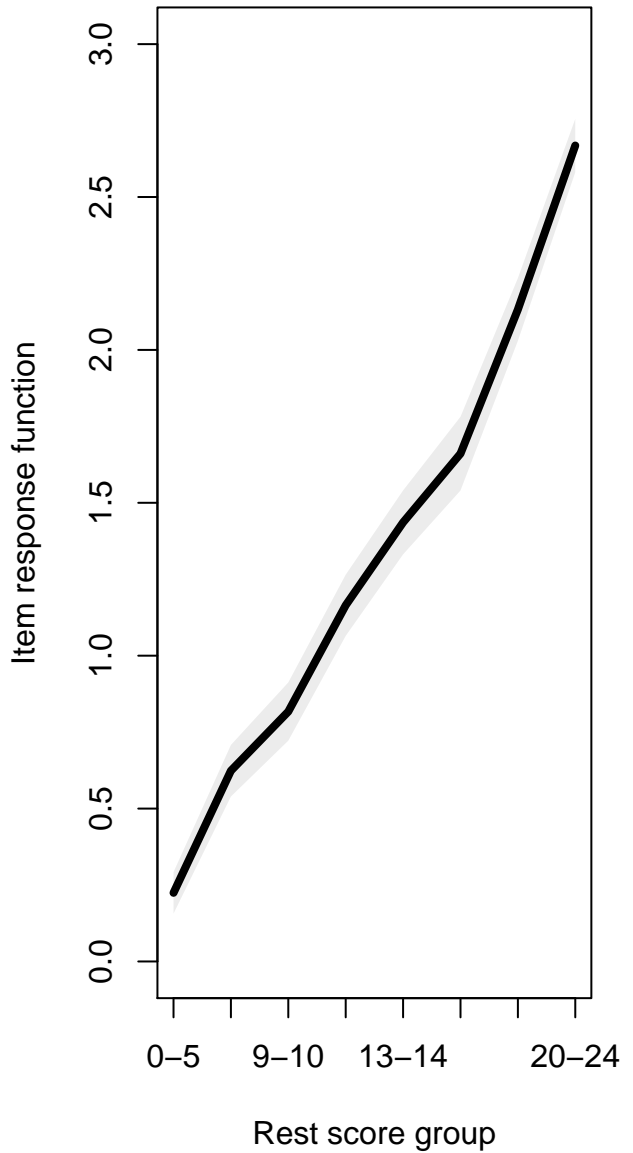

### ODI3

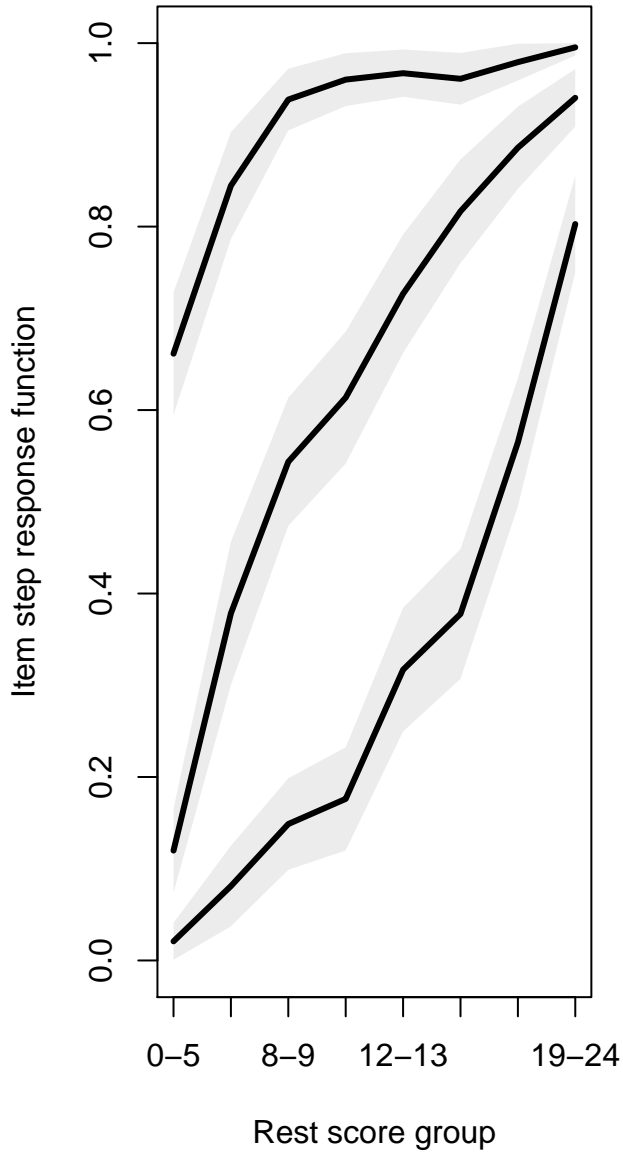

### ODI3

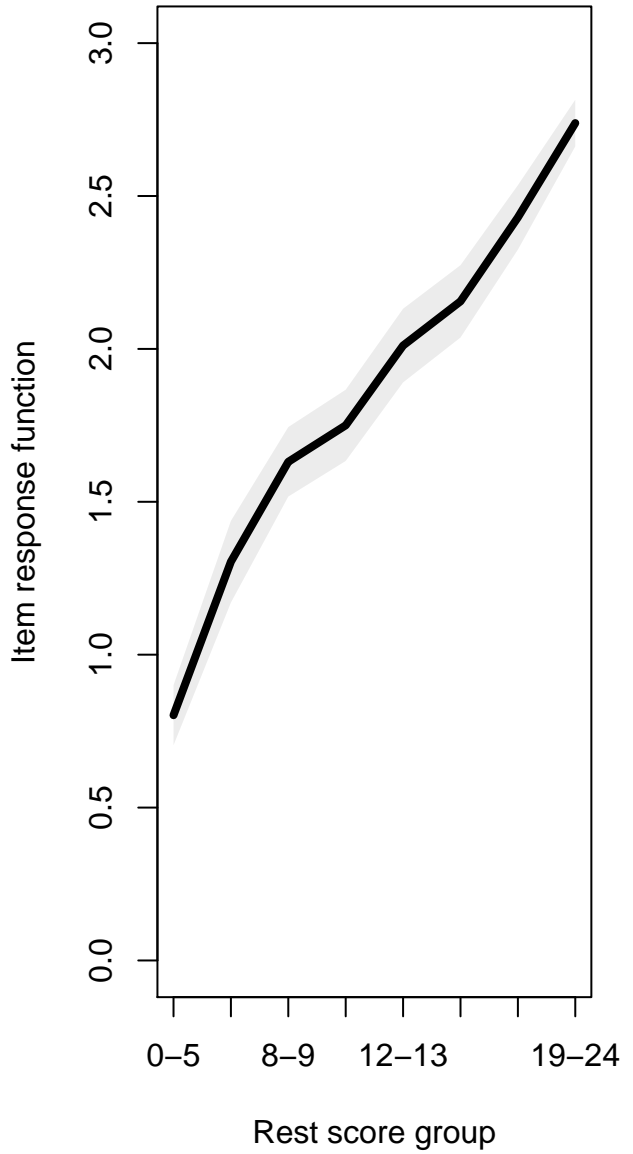

**ODI4**

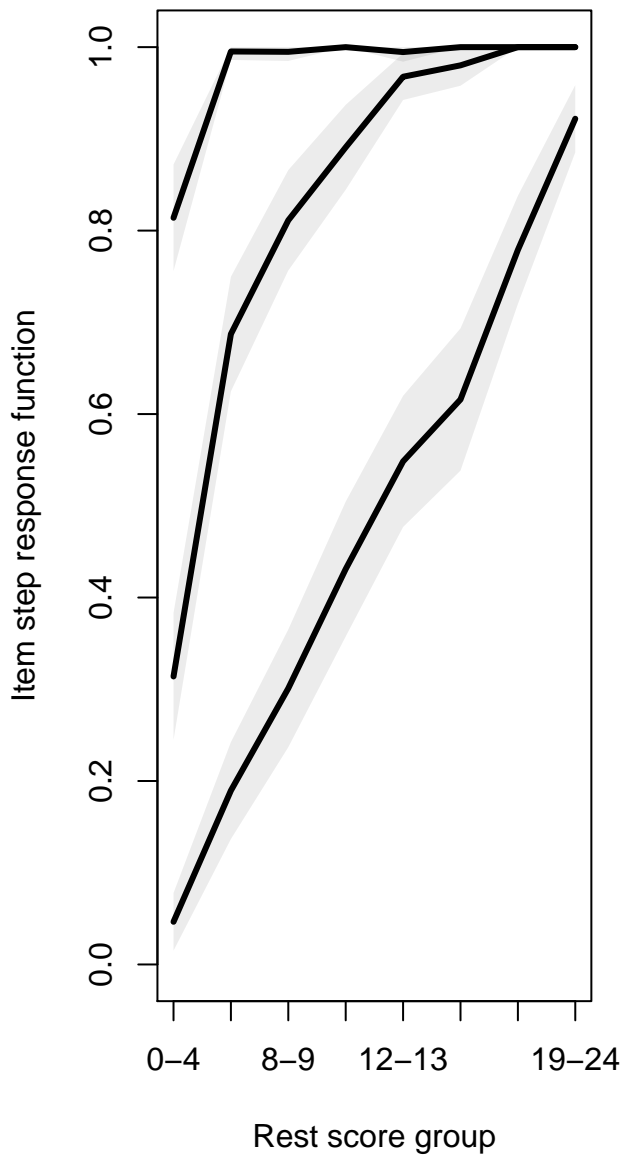

**ODI4**

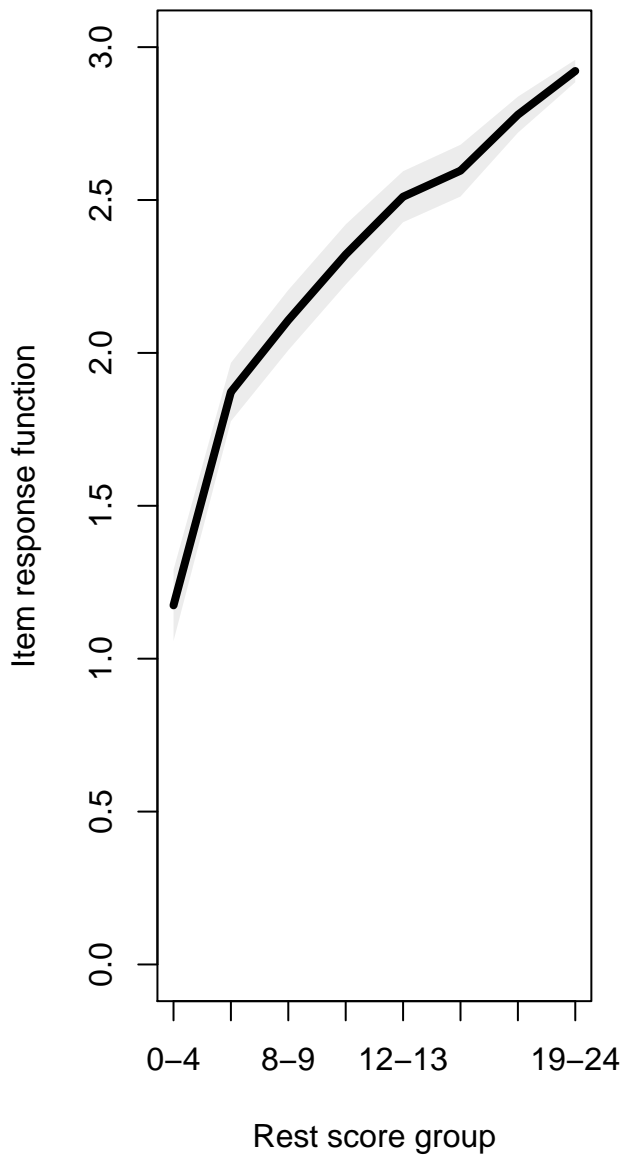

**ODI5**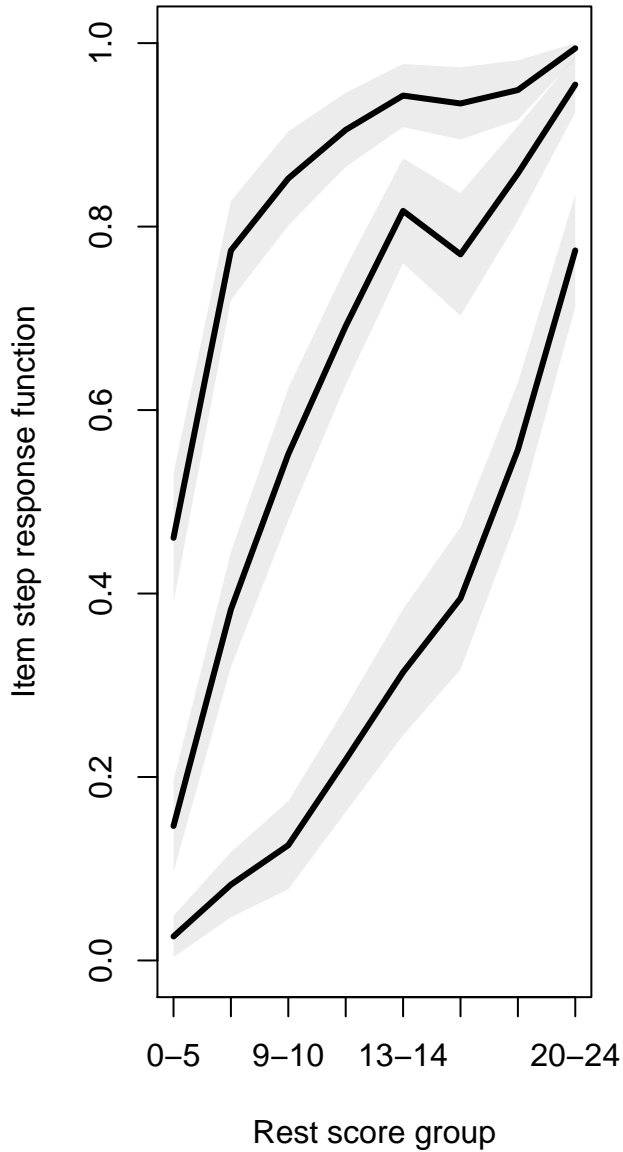**ODI5**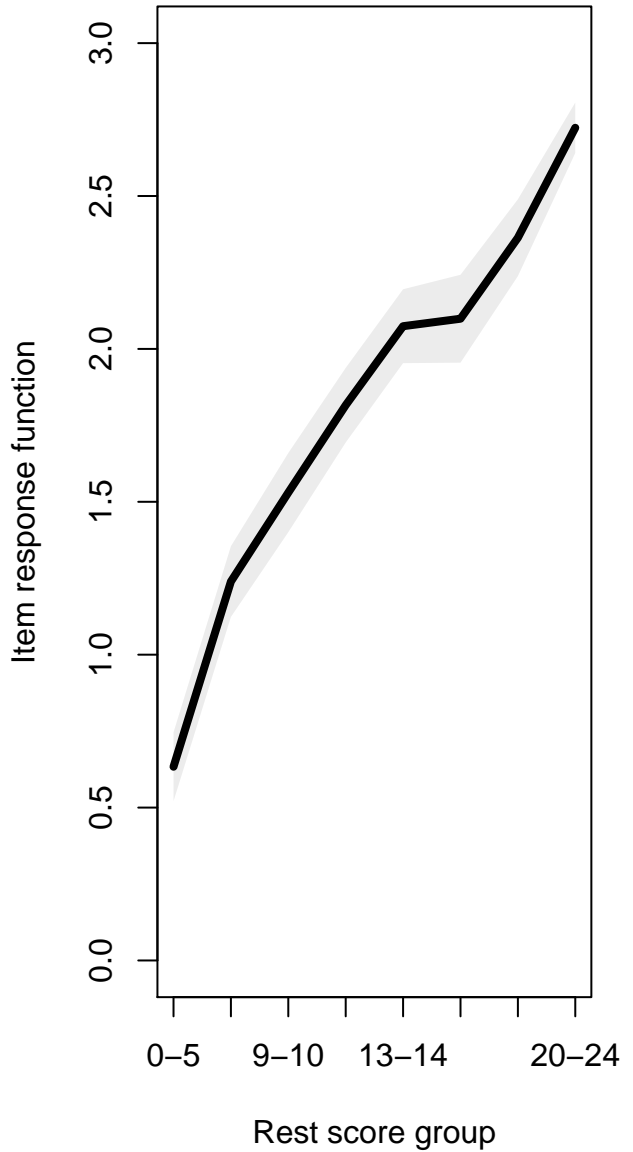

**ODI6**

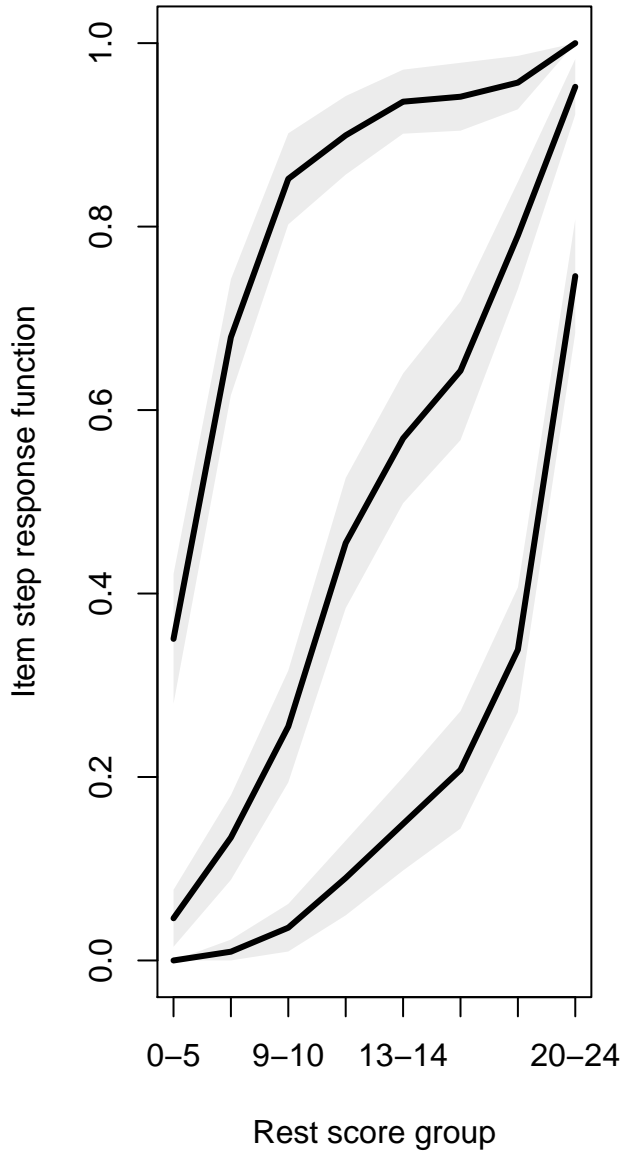

**ODI6**

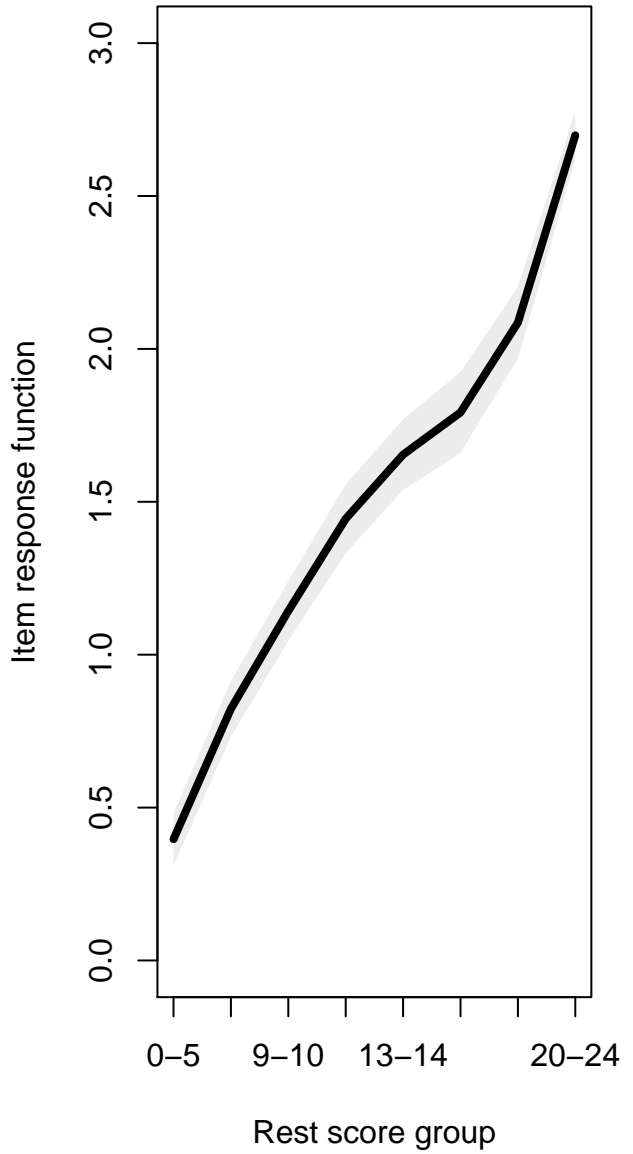

**ODI7**

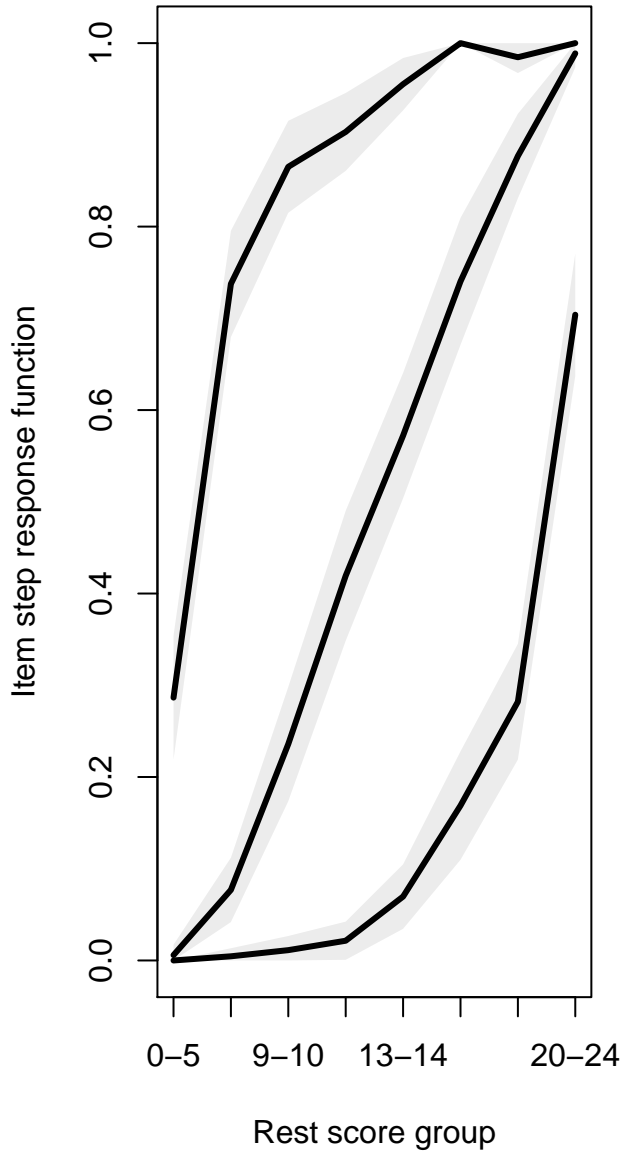

**ODI7**

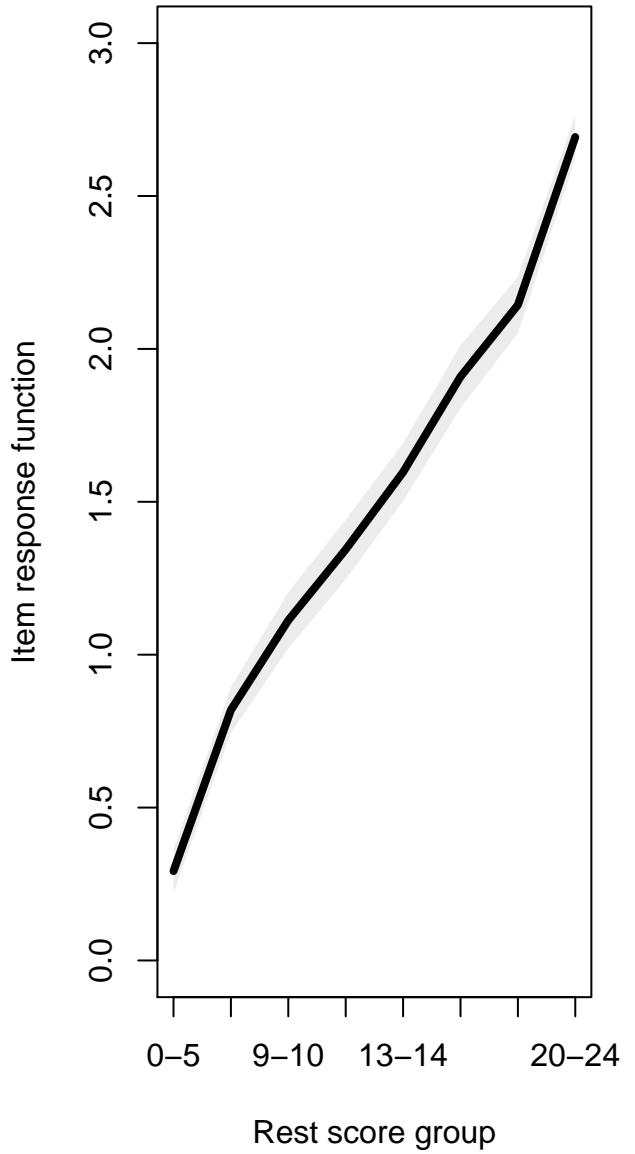

# ODI8

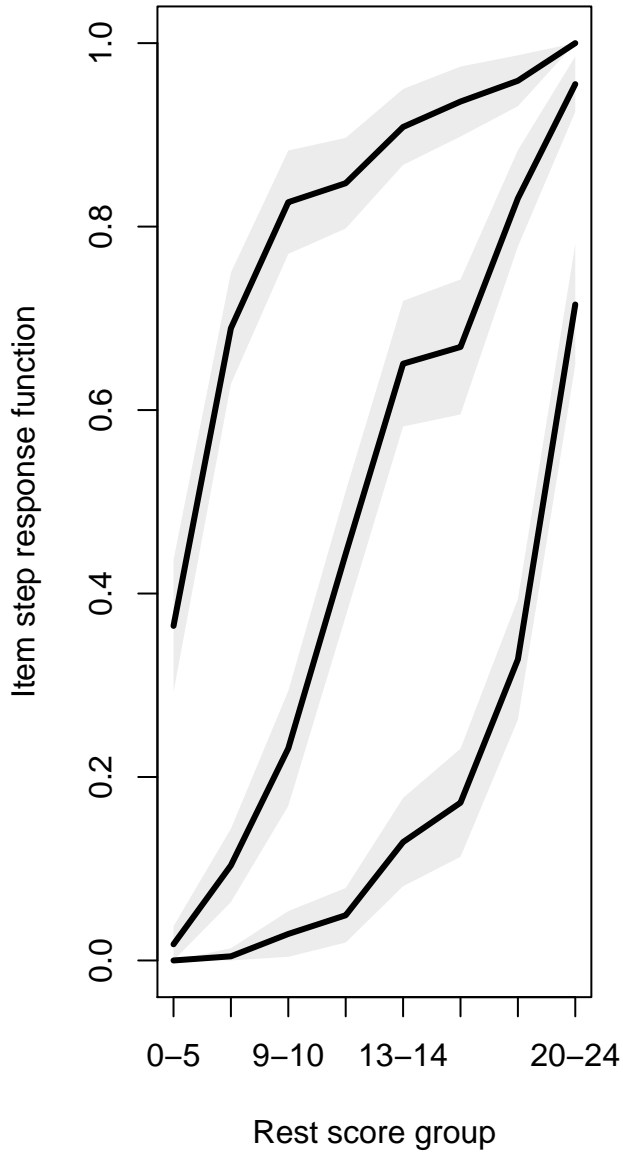

# ODI8

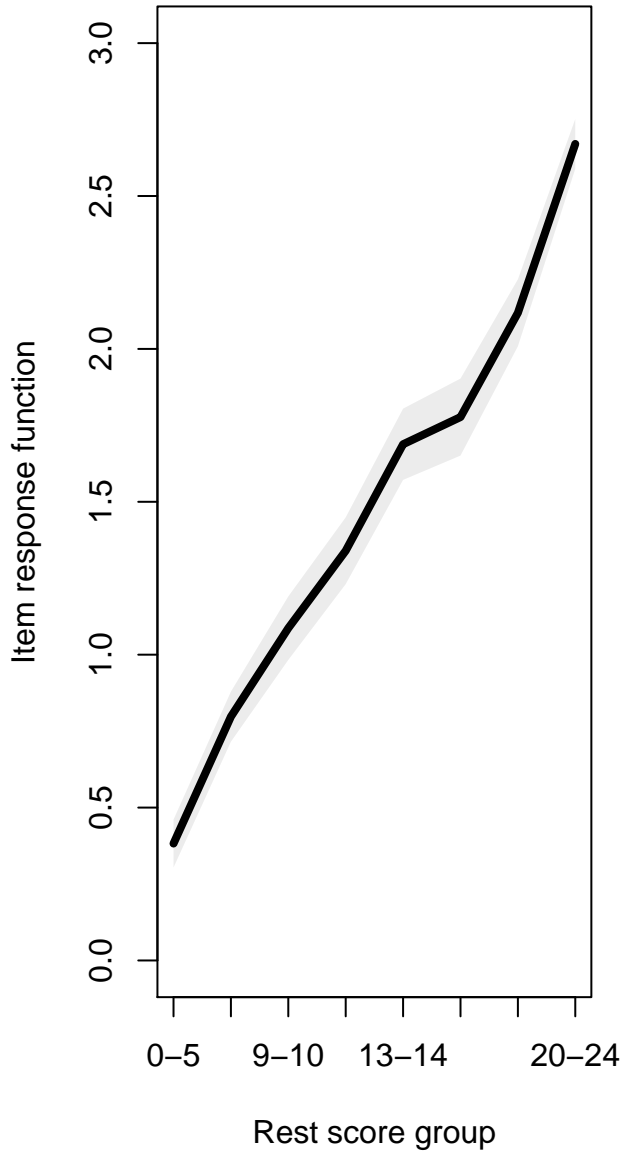



**ODI9**

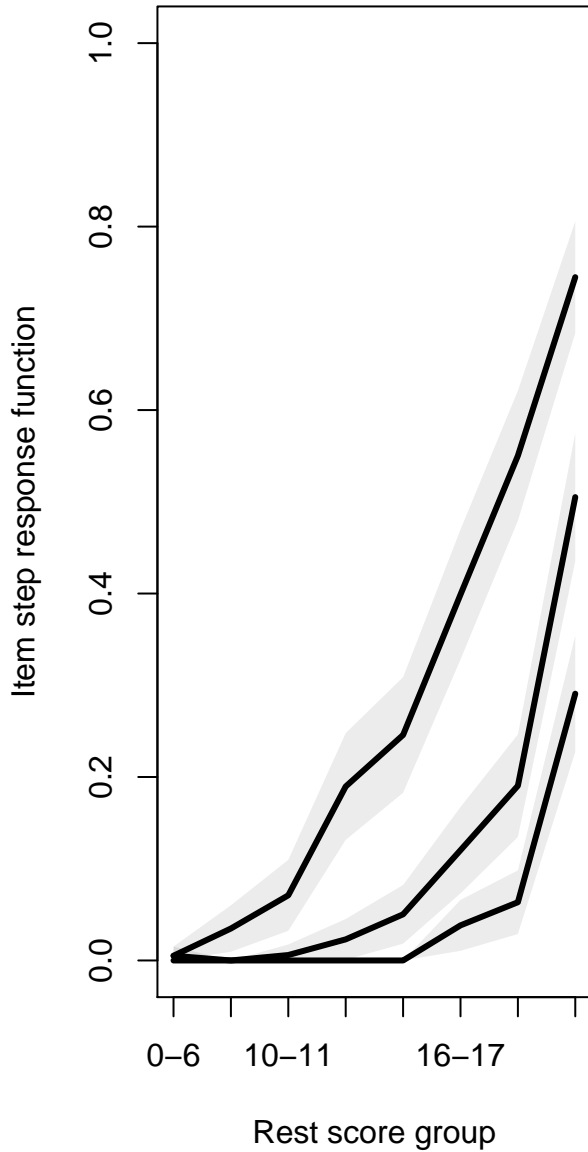

**ODI9**

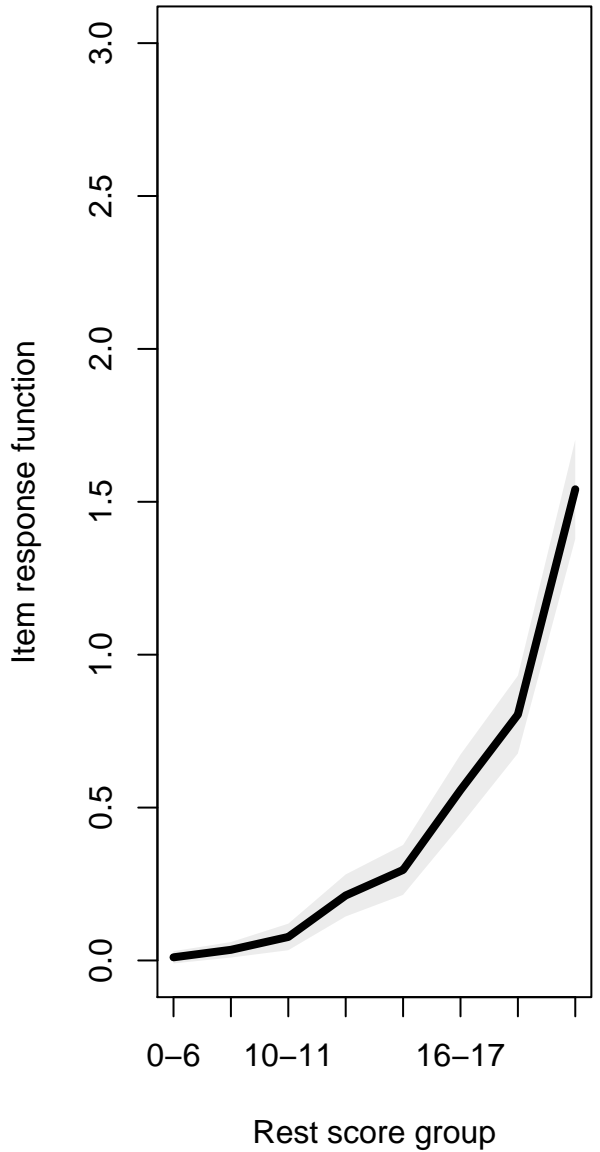

Supplement: SMI-39-137-s009.pdf [file SMI-39-137-s009.pdf]
