# Supplementary material for: Towards a new approach to job‐related distress: A three‐sample study of the Occupational Depression Inventory
Source: PubMed Central journal article supplement — Stress Health. 2022 Jun 20;39(1):137–53. doi: 10.1002/smi.3177 (PMC10084211; doi:10.1002/smi.3177), 2022-06-20
Supplement: SMI-39-137-s003.pdf [file SMI-39-137-s003.pdf]

Supplemental Table 3a

*Mokken Scale Analysis of the Occupational Depression Inventory in the French Sample: Pairwise H Coefficients*

|      | ODI2 | SE   | ODI3 | SE   | ODI4 | SE   | ODI5 | SE   | ODI6 | SE   | ODI7 | SE   | ODI8 | SE   | ODI9 | SE   |
|------|------|------|------|------|------|------|------|------|------|------|------|------|------|------|------|------|
| ODI1 | 0.66 | 0.01 | 0.56 | 0.01 | 0.65 | 0.01 | 0.50 | 0.02 | 0.56 | 0.02 | 0.65 | 0.01 | 0.60 | 0.02 | 0.58 | 0.03 |
| ODI2 | —    | —    | 0.60 | 0.01 | 0.65 | 0.01 | 0.50 | 0.02 | 0.70 | 0.01 | 0.63 | 0.01 | 0.58 | 0.01 | 0.67 | 0.02 |
| ODI3 |      |      | —    | —    | 0.61 | 0.01 | 0.51 | 0.02 | 0.50 | 0.02 | 0.60 | 0.02 | 0.56 | 0.02 | 0.61 | 0.03 |
| ODI4 |      |      |      |      | —    | —    | 0.55 | 0.02 | 0.54 | 0.02 | 0.59 | 0.01 | 0.58 | 0.01 | 0.65 | 0.03 |
| ODI5 |      |      |      |      |      |      | —    | —    | 0.44 | 0.02 | 0.52 | 0.02 | 0.52 | 0.02 | 0.53 | 0.03 |
| ODI6 |      |      |      |      |      |      |      |      | —    | —    | 0.59 | 0.01 | 0.54 | 0.02 | 0.62 | 0.03 |
| ODI7 |      |      |      |      |      |      |      |      |      |      | —    | —    | 0.66 | 0.01 | 0.60 | 0.03 |
| ODI8 |      |      |      |      |      |      |      |      |      |      |      |      | —    | —    | 0.50 | 0.03 |

Notes. **N = 3,454**. SE: standard error. ODI1: anhedonia; ODI2: depressed mood; ODI3: sleep alterations; ODI4: fatigue/loss of energy; ODI5: appetite alterations; ODI6: feelings of worthlessness; ODI7: cognitive impairment; ODI8: psychomotor alterations; ODI9: suicidal ideation.

Supplemental Table 3b

*Mokken Scale Analysis of the Occupational Depression Inventory in the Swiss Sample: Pairwise H Coefficients*

|      | ODI2 | SE   | ODI3 | SE   | ODI4 | SE   | ODI5 | SE   | ODI6 | SE   | ODI7 | SE   | ODI8 | SE   | ODI9 | SE   |
|------|------|------|------|------|------|------|------|------|------|------|------|------|------|------|------|------|
| ODI1 | 0.54 | 0.02 | 0.48 | 0.02 | 0.62 | 0.02 | 0.53 | 0.02 | 0.44 | 0.03 | 0.64 | 0.02 | 0.57 | 0.02 | 0.43 | 0.04 |
| ODI2 | —    | —    | 0.51 | 0.02 | 0.57 | 0.02 | 0.45 | 0.03 | 0.69 | 0.02 | 0.57 | 0.02 | 0.53 | 0.02 | 0.62 | 0.03 |
| ODI3 |      |      | —    | —    | 0.60 | 0.02 | 0.58 | 0.02 | 0.45 | 0.03 | 0.57 | 0.02 | 0.57 | 0.02 | 0.46 | 0.04 |
| ODI4 |      |      |      |      | —    | —    | 0.58 | 0.02 | 0.42 | 0.03 | 0.58 | 0.02 | 0.60 | 0.02 | 0.53 | 0.04 |
| ODI5 |      |      |      |      |      |      | —    | —    | 0.40 | 0.03 | 0.54 | 0.02 | 0.57 | 0.02 | 0.40 | 0.04 |
| ODI6 |      |      |      |      |      |      |      |      | —    | —    | 0.55 | 0.02 | 0.48 | 0.03 | 0.57 | 0.04 |
| ODI7 |      |      |      |      |      |      |      |      |      |      | —    | —    | 0.64 | 0.02 | 0.47 | 0.04 |
| ODI8 |      |      |      |      |      |      |      |      |      |      |      |      | —    | —    | 0.47 | 0.04 |

Notes. **N = 1,971**. SE: standard error. ODI1: anhedonia; ODI2: depressed mood; ODI3: sleep alterations; ODI4: fatigue/loss of energy; ODI5: appetite alterations; ODI6: feelings of worthlessness; ODI7: cognitive impairment; ODI8: psychomotor alterations; ODI9: suicidal ideation.

Supplemental Table 3c

*Mokken Scale Analysis of the Occupational Depression Inventory in the Australian Sample: Pairwise H Coefficients*

|      | ODI2 | SE   | ODI3 | SE   | ODI4 | SE   | ODI5 | SE   | ODI6 | SE   | ODI7 | SE   | ODI8 | SE   | ODI9 | SE   |
|------|------|------|------|------|------|------|------|------|------|------|------|------|------|------|------|------|
| ODI1 | 0.76 | 0.02 | 0.58 | 0.02 | 0.68 | 0.02 | 0.54 | 0.02 | 0.62 | 0.02 | 0.70 | 0.02 | 0.62 | 0.02 | 0.63 | 0.02 |
| ODI2 | —    | —    | 0.56 | 0.02 | 0.60 | 0.02 | 0.52 | 0.02 | 0.67 | 0.02 | 0.65 | 0.02 | 0.58 | 0.02 | 0.75 | 0.02 |
| ODI3 |      |      | —    | —    | 0.62 | 0.02 | 0.46 | 0.03 | 0.50 | 0.03 | 0.60 | 0.02 | 0.57 | 0.02 | 0.57 | 0.03 |
| ODI4 |      |      |      |      | —    | —    | 0.56 | 0.03 | 0.51 | 0.02 | 0.58 | 0.02 | 0.54 | 0.02 | 0.65 | 0.03 |
| ODI5 |      |      |      |      |      |      | —    | —    | 0.49 | 0.02 | 0.60 | 0.02 | 0.55 | 0.02 | 0.51 | 0.03 |
| ODI6 |      |      |      |      |      |      |      |      | —    | —    | 0.63 | 0.02 | 0.53 | 0.02 | 0.66 | 0.03 |
| ODI7 |      |      |      |      |      |      |      |      |      |      | —    | —    | 0.73 | 0.02 | 0.60 | 0.03 |
| ODI8 |      |      |      |      |      |      |      |      |      |      |      |      | —    | —    | 0.60 | 0.03 |

Notes. **N** = 1,485. SE: standard error. ODI1: anhedonia; ODI2: depressed mood; ODI3: sleep alterations; ODI4: fatigue/loss of energy; ODI5: appetite alterations; ODI6: feelings of worthlessness; ODI7: cognitive impairment; ODI8: psychomotor alterations; ODI9: suicidal ideation.

Supplemental Table 3d  
Invariant Item Ordering

| French sample (N = 3,454) |     |       |             | Swiss sample (N = 1,971) |     |       |             | Australian sample (N = 1,485) |     |       |             |
|---------------------------|-----|-------|-------------|--------------------------|-----|-------|-------------|-------------------------------|-----|-------|-------------|
| Items                     | #vi | #tsig | <i>crit</i> | Items                    | #vi | #tsig | <i>crit</i> | Items                         | #vi | #tsig | <i>crit</i> |
| OD14                      | 0   | 0     | 0           | OD14                     | 0   | 0     | 0           | OD14                          | 0   | 0     | 0           |
| OD13                      | 0   | 0     | 0           | OD13                     | 0   | 0     | 0           | OD13                          | 0   | 0     | 0           |
| OD11                      | 0   | 0     | 0           | OD11                     | 0   | 0     | 0           | OD15                          | 0   | 0     | 0           |
| OD12                      | 0   | 0     | 0           | OD12                     | 0   | 0     | 0           | OD11                          | 0   | 0     | 0           |
| OD18                      | 0   | 0     | 0           | OD18                     | 1   | 1     | 34          | OD16                          | 0   | 0     | 0           |
| OD15                      | 1   | 1     | 36          | OD15                     | 1   | 1     | 37          | OD17                          | 0   | 0     | 0           |
| OD17                      | 1   | 1     | 31          | OD17                     | 0   | 0     | 0           | OD18                          | 0   | 0     | 0           |
| OD16                      | 0   | 0     | 0           | OD16                     | 0   | 0     | 0           | OD12                          | 0   | 0     | 0           |
| OD19                      | 0   | 0     | 0           | OD19                     | 0   | 0     | 0           | OD19                          | 0   | 0     | 0           |

Notes. #vi: violations; #tsig: significant violations; *crit*: serious violations—items for which the *crit* statistic reaches 80 seriously violate requirements. OD11: anhedonia; OD12: depressed mood; OD13: sleep alterations; OD14: fatigue/loss of energy; OD15: appetite alterations; OD16: feelings of worthlessness; OD17: cognitive impairment; OD18: psychomotor alterations; OD19: suicidal ideation.
