# Supplementary material for: Towards a new approach to job‐related distress: A three‐sample study of the Occupational Depression Inventory
Source: PubMed Central journal article supplement — Stress Health. 2022 Jun 20;39(1):137–53. doi: 10.1002/smi.3177 (PMC10084211; doi:10.1002/smi.3177), 2022-06-20
Supplement: SMI-39-137-s006.pdf [file SMI-39-137-s006.pdf]

Supplemental Table 2a

*Measurement Invariance Across Sexes and Age Categories in the French Sample, the Swiss Sample, and the Australian Sample*

|                   | Sex      |    |       |              |       |               | Age category |    |       |              |       |               |
|-------------------|----------|----|-------|--------------|-------|---------------|--------------|----|-------|--------------|-------|---------------|
|                   | $\chi^2$ | df | CFI   | $\Delta$ CFI | SRMR  | $\Delta$ SRMR | $\chi^2$     | df | CFI   | $\Delta$ CFI | SRMR  | $\Delta$ SRMR |
| French sample     |          |    |       |              |       |               |              |    |       |              |       |               |
| Configural model  | 461.743  | 54 | 0.989 | —            | 0.028 | —             | 488.171      | 54 | 0.989 | —            | 0.029 | —             |
| Metric model      | 466.268  | 62 | 0.989 | 0.000        | 0.029 | 0.001         | 476.018      | 62 | 0.989 | 0.000        | 0.030 | 0.001         |
| Scalar model      | 438.277  | 79 | 0.990 | 0.001        | 0.029 | 0.000         | 490.729      | 79 | 0.989 | 0.000        | 0.030 | 0.000         |
| Swiss sample      |          |    |       |              |       |               |              |    |       |              |       |               |
| Configural model  | 531.837  | 54 | 0.968 | —            | 0.045 | —             | 549.987      | 54 | 0.967 | —            | 0.045 | —             |
| Metric model      | 539.904  | 62 | 0.968 | 0.000        | 0.046 | 0.001         | 548.113      | 62 | 0.967 | 0.000        | 0.046 | 0.001         |
| Scalar model      | 508.507  | 79 | 0.971 | 0.003        | 0.047 | 0.001         | 528.012      | 79 | 0.970 | 0.003        | 0.047 | 0.001         |
| Australian sample |          |    |       |              |       |               |              |    |       |              |       |               |
| Configural model  | 454.374  | 54 | 0.979 | —            | 0.035 | —             | 421.256      | 54 | 0.979 | —            | 0.037 | —             |
| Metric model      | 446.668  | 62 | 0.980 | 0.001        | 0.035 | 0.000         | 419.040      | 62 | 0.980 | 0.001        | 0.038 | 0.001         |
| Scalar model      | 409.047  | 79 | 0.983 | 0.003        | 0.036 | 0.001         | 401.778      | 79 | 0.982 | 0.002        | 0.038 | 0.000         |

*Notes.* The French sample comprises 3,454 participants (2,870 females); the Swiss sample comprises 1,971 participants (1,411 females); the Australian sample comprises 1,485 participants (1,347 females). In each sample, age groups were constituted based on a median split, with individuals falling below the median assigned to a “younger” group and individuals at, or above, the median assigned to an “older” group. CFI: Comparative Fit Index;  $\Delta$ CFI: delta (change in) CFI; SRMR: Standardized Root Mean Squared Residual;  $\Delta$ SRMR: delta (change in) SRMR; df: degrees of freedom.

Supplemental Table 2b

*Measurement Invariance Across Samples*

|                  | $\chi^2$ | df  | CFI   | $\Delta$ CFI | SRMR  | $\Delta$ SRMR |
|------------------|----------|-----|-------|--------------|-------|---------------|
| Configural model | 2066.904 | 162 | 0.983 | —            | 0.034 | —             |
| Metric model     | 2536.225 | 202 | 0.979 | -0.004       | 0.037 | 0.003         |
| Scalar model     | 3000.515 | 287 | 0.976 | -0.003       | 0.039 | 0.002         |

*Notes.* The analysis involved six samples. The first three samples are the original samples on which the Occupational Depression Inventory was initially validated (Bianchi & Schonfeld, 2020). The fourth sample is our French sample ( $N = 3,454$ ). The fifth sample is our Swiss sample ( $N = 1,971$ ). The sixth sample is our Australian sample ( $N = 1,485$ ). CFI: Comparative Fit Index;  $\Delta$ CFI: delta (change in) CFI; SRMR: Standardized Root Mean Squared Residual;  $\Delta$ SRMR: delta (change in) SRMR; df: degrees of freedom.
