# Supplementary material for: Towards a new approach to job‐related distress: A three‐sample study of the Occupational Depression Inventory
Source: PubMed Central journal article supplement — Stress Health. 2022 Jun 20;39(1):137–53. doi: 10.1002/smi.3177 (PMC10084211; doi:10.1002/smi.3177), 2022-06-20
Supplement: SMI-39-137-s007.pdf [file SMI-39-137-s007.pdf]

Supplemental Table 1a

*Distribution of the Scores on the Nine Core Symptom Items of the Occupational Depression Inventory in the French Sample*

|                    | ODI1  | ODI2  | ODI3  | ODI4  | ODI5  | ODI6  | ODI7  | ODI8  | ODI9  |
|--------------------|-------|-------|-------|-------|-------|-------|-------|-------|-------|
| % scoring 0        | 20.38 | 25.16 | 20.00 | 8.00  | 42.79 | 40.62 | 37.32 | 32.92 | 91.52 |
| % scoring 1        | 39.49 | 40.85 | 32.40 | 27.00 | 25.33 | 35.61 | 35.76 | 36.39 | 5.96  |
| % scoring 2        | 25.45 | 22.58 | 26.90 | 35.10 | 20.35 | 17.40 | 19.20 | 21.54 | 1.77  |
| % scoring 3        | 14.68 | 11.41 | 20.70 | 29.90 | 11.52 | 6.37  | 7.73  | 9.15  | 0.75  |
| Mean               | 1.34  | 1.20  | 1.48  | 1.87  | 1.01  | 0.90  | 0.97  | 1.07  | 0.12  |
| Mode               | 1     | 1     | 1     | 2     | 0     | 0     | 0     | 1     | 0     |
| Standard deviation | 0.96  | 0.94  | 1.03  | 0.93  | 1.05  | 0.91  | 0.93  | 0.95  | 0.43  |
| Skewness           | 0.25  | 0.40  | 0.07  | -0.33 | 0.59  | 0.72  | 0.62  | 0.50  | 4.27  |
| Kurtosis           | -0.88 | -0.73 | -1.14 | -0.87 | -0.94 | -0.39 | -0.57 | -0.73 | 19.95 |

*Notes.* **N** = 3,454. For each item in each sample, scores ranged from 0 to 3. *SE*: standard error. ODI1: anhedonia; ODI2: depressed mood; ODI3: sleep alterations; ODI4: fatigue/loss of energy; ODI5: appetite alterations; ODI6: feelings of worthlessness; ODI7: cognitive impairment; ODI8: psychomotor alterations; ODI9: suicidal ideation. The *SE* for Skewness was 0.04. The *SE* for Kurtosis was 0.08.

Supplemental Table 1b

*Distribution of the Scores on the Nine Core Symptom Items of the Occupational Depression Inventory in the Swiss Sample*

|                    | ODI1  | ODI2  | ODI3  | ODI4  | ODI5  | ODI6  | ODI7  | ODI8  | ODI9  |
|--------------------|-------|-------|-------|-------|-------|-------|-------|-------|-------|
| % scoring 0        | 37.95 | 45.66 | 40.13 | 23.49 | 61.69 | 62.66 | 58.45 | 57.03 | 91.73 |
| % scoring 1        | 39.32 | 36.23 | 34.25 | 40.74 | 21.82 | 24.51 | 28.77 | 28.72 | 5.07  |
| % scoring 2        | 16.59 | 11.82 | 18.11 | 23.49 | 11.47 | 8.83  | 9.34  | 10.20 | 2.13  |
| % scoring 3        | 6.14  | 6.29  | 7.51  | 12.28 | 5.02  | 4.01  | 3.45  | 4.06  | 1.07  |
| Mean               | 0.91  | 0.79  | 0.93  | 1.25  | 0.60  | 0.54  | 0.58  | 0.61  | 0.13  |
| Mode               | 1     | 0     | 0     | 1     | 0     | 0     | 0     | 0     | 0     |
| Standard deviation | 0.88  | 0.88  | 0.94  | 0.95  | 0.88  | 0.82  | 0.80  | 0.83  | 0.47  |
| Skewness           | 0.71  | 0.97  | 0.69  | 0.36  | 1.32  | 1.46  | 1.31  | 1.25  | 4.24  |
| Kurtosis           | -0.28 | 0.18  | -0.51 | -0.77 | 0.70  | 1.36  | 1.05  | 0.81  | 18.90 |

Notes. **N = 1,971**. For each item in each sample, scores ranged from 0 to 3. SE: standard error. ODI1: anhedonia; ODI2: depressed mood; ODI3: sleep alterations; ODI4: fatigue/loss of energy; ODI5: appetite alterations; ODI6: feelings of worthlessness; ODI7: cognitive impairment; ODI8: psychomotor alterations; ODI9: suicidal ideation. The SE for Skewness was 0.06. The SE for Kurtosis was 0.11.

Supplemental Table 1c

*Distribution of the Scores on the Nine Core Symptom Items of the Occupational Depression Inventory in the Australian Sample*

|                    | ODI1  | ODI2  | ODI3  | ODI4  | ODI5  | ODI6  | ODI7  | ODI8  | ODI9  |
|--------------------|-------|-------|-------|-------|-------|-------|-------|-------|-------|
| % scoring 0        | 9.83  | 22.76 | 8.42  | 2.36  | 15.56 | 17.31 | 15.76 | 18.38 | 71.72 |
| % scoring 1        | 33.20 | 35.62 | 27.68 | 14.41 | 21.41 | 35.22 | 36.09 | 33.47 | 16.70 |
| % scoring 2        | 33.94 | 25.32 | 31.18 | 35.15 | 33.33 | 27.95 | 32.79 | 30.71 | 6.46  |
| % scoring 3        | 23.03 | 16.30 | 32.73 | 48.08 | 29.70 | 19.53 | 15.35 | 17.44 | 5.12  |
| Mean               | 1.70  | 1.35  | 1.88  | 2.29  | 1.77  | 1.50  | 1.48  | 1.47  | 0.45  |
| Mode               | 2     | 1     | 3     | 3     | 2     | 1     | 1     | 1     | 0     |
| Standard deviation | 0.93  | 1.00  | 0.96  | 0.80  | 1.04  | 0.99  | 0.93  | 0.98  | 0.83  |
| Skewness           | -0.11 | 0.22  | -0.33 | -0.85 | -0.36 | 0.08  | 0.05  | 0.05  | 1.86  |
| Kurtosis           | -0.92 | -1.02 | -0.98 | -0.09 | -1.04 | -1.04 | -0.87 | -1.01 | 2.53  |

*Notes.* **N = 1,485.** For each item in each sample, scores ranged from 0 to 3. SE: standard error. ODI1: anhedonia; ODI2: depressed mood; ODI3: sleep alterations; ODI4: fatigue/loss of energy; ODI5: appetite alterations; ODI6: feelings of worthlessness; ODI7: cognitive impairment; ODI8: psychomotor alterations; ODI9: suicidal ideation. The SE for Skewness was 0.06. The SE for Kurtosis was 0.13.

Supplemental Table 1d

*Kendall  $\tau_B$  and Spearman  $\rho$  Correlations Among the Items of the Occupational Depression Inventory in the French Sample*

| Parameter 1 | Parameter 2 | Kendall $\tau_B$ | 95% CI       | Spearman $\rho$ | 95% CI       |
|-------------|-------------|------------------|--------------|-----------------|--------------|
| ODI1        | ODI2        | 0.55             | [0.53, 0.56] | 0.61            | [0.59, 0.63] |
| ODI1        | ODI3        | 0.46             | [0.44, 0.48] | 0.53            | [0.50, 0.55] |
| ODI1        | ODI4        | 0.49             | [0.48, 0.51] | 0.56            | [0.53, 0.58] |
| ODI1        | ODI5        | 0.39             | [0.37, 0.41] | 0.44            | [0.42, 0.47] |
| ODI1        | ODI6        | 0.42             | [0.40, 0.44] | 0.48            | [0.45, 0.50] |
| ODI1        | ODI7        | 0.50             | [0.48, 0.52] | 0.56            | [0.54, 0.59] |
| ODI1        | ODI8        | 0.47             | [0.45, 0.48] | 0.52            | [0.50, 0.55] |
| ODI1        | ODI9        | 0.25             | [0.23, 0.27] | 0.27            | [0.24, 0.30] |
| ODI2        | ODI3        | 0.48             | [0.46, 0.50] | 0.55            | [0.52, 0.57] |
| ODI2        | ODI4        | 0.51             | [0.49, 0.53] | 0.57            | [0.55, 0.60] |
| ODI2        | ODI5        | 0.40             | [0.38, 0.42] | 0.46            | [0.43, 0.48] |
| ODI2        | ODI6        | 0.54             | [0.53, 0.56] | 0.60            | [0.58, 0.63] |
| ODI2        | ODI7        | 0.50             | [0.48, 0.51] | 0.56            | [0.53, 0.58] |
| ODI2        | ODI8        | 0.47             | [0.45, 0.48] | 0.53            | [0.50, 0.55] |
| ODI2        | ODI9        | 0.30             | [0.28, 0.32] | 0.33            | [0.30, 0.36] |
| ODI3        | ODI4        | 0.48             | [0.46, 0.49] | 0.54            | [0.52, 0.57] |
| ODI3        | ODI5        | 0.40             | [0.38, 0.42] | 0.46            | [0.43, 0.48] |
| ODI3        | ODI6        | 0.38             | [0.36, 0.40] | 0.44            | [0.41, 0.46] |
| ODI3        | ODI7        | 0.47             | [0.45, 0.48] | 0.53            | [0.50, 0.55] |
| ODI3        | ODI8        | 0.43             | [0.41, 0.45] | 0.49            | [0.46, 0.51] |
| ODI3        | ODI9        | 0.23             | [0.21, 0.25] | 0.25            | [0.22, 0.28] |
| ODI4        | ODI5        | 0.42             | [0.40, 0.44] | 0.48            | [0.45, 0.50] |
| ODI4        | ODI6        | 0.41             | [0.39, 0.43] | 0.46            | [0.43, 0.49] |
| ODI4        | ODI7        | 0.46             | [0.45, 0.48] | 0.52            | [0.50, 0.55] |
| ODI4        | ODI8        | 0.46             | [0.45, 0.48] | 0.52            | [0.50, 0.55] |
| ODI4        | ODI9        | 0.21             | [0.18, 0.23] | 0.22            | [0.19, 0.26] |
| ODI5        | ODI6        | 0.36             | [0.34, 0.37] | 0.40            | [0.37, 0.43] |
| ODI5        | ODI7        | 0.43             | [0.41, 0.44] | 0.48            | [0.46, 0.51] |
| ODI5        | ODI8        | 0.42             | [0.40, 0.44] | 0.48            | [0.45, 0.51] |
| ODI5        | ODI9        | 0.23             | [0.21, 0.25] | 0.25            | [0.22, 0.29] |
| ODI6        | ODI7        | 0.49             | [0.48, 0.51] | 0.55            | [0.52, 0.57] |
| ODI6        | ODI8        | 0.42             | [0.40, 0.44] | 0.47            | [0.45, 0.50] |
| ODI6        | ODI9        | 0.30             | [0.28, 0.32] | 0.33            | [0.29, 0.36] |
| ODI7        | ODI8        | 0.54             | [0.53, 0.56] | 0.60            | [0.58, 0.63] |
| ODI7        | ODI9        | 0.30             | [0.28, 0.32] | 0.32            | [0.29, 0.35] |
| ODI8        | ODI9        | 0.24             | [0.21, 0.26] | 0.26            | [0.22, 0.29] |

*Notes.* **N** = 3,454. CI: confidence interval. All correlations are statistically significant at  $p < .001$ . ODI1: anhedonia; ODI2: depressed mood; ODI3: sleep alterations; ODI4: fatigue/loss of energy; ODI5: appetite alterations; ODI6: feelings of worthlessness; ODI7: cognitive impairment; ODI8: psychomotor alterations; ODI9: suicidal ideation.

Supplemental Table 1e

*Kendall  $\tau_B$  and Spearman  $\rho$  Correlations Among the Items of the Occupational Depression Inventory in the Swiss Sample*

| Parameter 1 | Parameter 2 | Kendall $\tau_B$ | 95% CI       | Spearman $\rho$ | 95% CI       |
|-------------|-------------|------------------|--------------|-----------------|--------------|
| ODI1        | ODI2        | 0.42             | [0.40, 0.44] | 0.46            | [0.43, 0.50] |
| ODI1        | ODI3        | 0.39             | [0.36, 0.41] | 0.43            | [0.40, 0.47] |
| ODI1        | ODI4        | 0.46             | [0.44, 0.49] | 0.52            | [0.49, 0.55] |
| ODI1        | ODI5        | 0.39             | [0.37, 0.42] | 0.43            | [0.40, 0.47] |
| ODI1        | ODI6        | 0.30             | [0.27, 0.32] | 0.33            | [0.29, 0.37] |
| ODI1        | ODI7        | 0.46             | [0.44, 0.48] | 0.50            | [0.47, 0.54] |
| ODI1        | ODI8        | 0.40             | [0.38, 0.42] | 0.44            | [0.40, 0.48] |
| ODI1        | ODI9        | 0.22             | [0.19, 0.25] | 0.24            | [0.19, 0.28] |
| ODI2        | ODI3        | 0.38             | [0.36, 0.41] | 0.43            | [0.39, 0.46] |
| ODI2        | ODI4        | 0.41             | [0.39, 0.44] | 0.46            | [0.43, 0.50] |
| ODI2        | ODI5        | 0.33             | [0.30, 0.36] | 0.36            | [0.32, 0.40] |
| ODI2        | ODI6        | 0.50             | [0.48, 0.53] | 0.54            | [0.51, 0.57] |
| ODI2        | ODI7        | 0.41             | [0.38, 0.43] | 0.44            | [0.40, 0.48] |
| ODI2        | ODI8        | 0.39             | [0.36, 0.41] | 0.42            | [0.38, 0.46] |
| ODI2        | ODI9        | 0.31             | [0.29, 0.34] | 0.33            | [0.29, 0.37] |
| ODI3        | ODI4        | 0.44             | [0.42, 0.46] | 0.50            | [0.46, 0.53] |
| ODI3        | ODI5        | 0.42             | [0.40, 0.45] | 0.47            | [0.43, 0.50] |
| ODI3        | ODI6        | 0.31             | [0.28, 0.33] | 0.34            | [0.30, 0.38] |
| ODI3        | ODI7        | 0.41             | [0.38, 0.43] | 0.45            | [0.41, 0.48] |
| ODI3        | ODI8        | 0.41             | [0.39, 0.44] | 0.45            | [0.42, 0.49] |
| ODI3        | ODI9        | 0.22             | [0.19, 0.25] | 0.24            | [0.20, 0.28] |
| ODI4        | ODI5        | 0.43             | [0.41, 0.45] | 0.48            | [0.44, 0.51] |
| ODI4        | ODI6        | 0.31             | [0.29, 0.34] | 0.35            | [0.31, 0.39] |
| ODI4        | ODI7        | 0.42             | [0.40, 0.44] | 0.47            | [0.43, 0.50] |
| ODI4        | ODI8        | 0.44             | [0.42, 0.46] | 0.49            | [0.45, 0.52] |
| ODI4        | ODI9        | 0.23             | [0.20, 0.26] | 0.25            | [0.21, 0.29] |
| ODI5        | ODI6        | 0.32             | [0.29, 0.35] | 0.35            | [0.31, 0.39] |
| ODI5        | ODI7        | 0.42             | [0.40, 0.44] | 0.46            | [0.42, 0.49] |
| ODI5        | ODI8        | 0.45             | [0.43, 0.48] | 0.49            | [0.46, 0.53] |
| ODI5        | ODI9        | 0.21             | [0.18, 0.24] | 0.22            | [0.18, 0.26] |
| ODI6        | ODI7        | 0.42             | [0.39, 0.44] | 0.45            | [0.41, 0.48] |
| ODI6        | ODI8        | 0.36             | [0.33, 0.38] | 0.39            | [0.35, 0.42] |
| ODI6        | ODI9        | 0.33             | [0.30, 0.36] | 0.35            | [0.31, 0.39] |
| ODI7        | ODI8        | 0.51             | [0.49, 0.54] | 0.55            | [0.51, 0.58] |
| ODI7        | ODI9        | 0.26             | [0.23, 0.29] | 0.28            | [0.23, 0.32] |
| ODI8        | ODI9        | 0.26             | [0.23, 0.28] | 0.27            | [0.23, 0.31] |

Notes.  $N = 1,971$ . CI: confidence interval. All correlations are statistically significant at  $p < .001$ . ODI1: anhedonia; ODI2: depressed mood; ODI3: sleep alterations; ODI4: fatigue/loss of energy; ODI5: appetite alterations; ODI6: feelings of worthlessness; ODI7: cognitive impairment; ODI8: psychomotor alterations; ODI9: suicidal ideation.

Supplemental Table 1f

*Kendall  $\tau_B$  and Spearman  $\rho$  Correlations Among the Items of the Occupational Depression Inventory in the Australian Sample*

| Parameter 1 | Parameter 2 | Kendall $\tau_B$ | 95% CI       | Spearman $\rho$ | 95% CI       |
|-------------|-------------|------------------|--------------|-----------------|--------------|
| ODI1        | ODI2        | 0.60             | [0.58, 0.62] | 0.67            | [0.64, 0.69] |
| ODI1        | ODI3        | 0.47             | [0.45, 0.50] | 0.53            | [0.49, 0.57] |
| ODI1        | ODI4        | 0.51             | [0.48, 0.53] | 0.56            | [0.52, 0.60] |
| ODI1        | ODI5        | 0.43             | [0.40, 0.46] | 0.49            | [0.45, 0.53] |
| ODI1        | ODI6        | 0.49             | [0.47, 0.52] | 0.56            | [0.52, 0.59] |
| ODI1        | ODI7        | 0.56             | [0.54, 0.58] | 0.62            | [0.59, 0.65] |
| ODI1        | ODI8        | 0.49             | [0.47, 0.52] | 0.56            | [0.52, 0.59] |
| ODI1        | ODI9        | 0.41             | [0.38, 0.43] | 0.45            | [0.41, 0.49] |
| ODI2        | ODI3        | 0.43             | [0.40, 0.46] | 0.49            | [0.45, 0.53] |
| ODI2        | ODI4        | 0.45             | [0.42, 0.47] | 0.50            | [0.46, 0.54] |
| ODI2        | ODI5        | 0.40             | [0.37, 0.43] | 0.46            | [0.42, 0.50] |
| ODI2        | ODI6        | 0.56             | [0.53, 0.58] | 0.63            | [0.59, 0.66] |
| ODI2        | ODI7        | 0.53             | [0.50, 0.55] | 0.60            | [0.56, 0.63] |
| ODI2        | ODI8        | 0.47             | [0.45, 0.50] | 0.54            | [0.50, 0.58] |
| ODI2        | ODI9        | 0.51             | [0.49, 0.54] | 0.57            | [0.53, 0.60] |
| ODI3        | ODI4        | 0.46             | [0.43, 0.49] | 0.51            | [0.47, 0.55] |
| ODI3        | ODI5        | 0.39             | [0.36, 0.42] | 0.44            | [0.40, 0.48] |
| ODI3        | ODI6        | 0.38             | [0.35, 0.41] | 0.44            | [0.39, 0.48] |
| ODI3        | ODI7        | 0.46             | [0.44, 0.49] | 0.52            | [0.48, 0.56] |
| ODI3        | ODI8        | 0.43             | [0.41, 0.46] | 0.50            | [0.46, 0.54] |
| ODI3        | ODI9        | 0.33             | [0.30, 0.36] | 0.37            | [0.32, 0.41] |
| ODI4        | ODI5        | 0.43             | [0.40, 0.46] | 0.48            | [0.44, 0.52] |
| ODI4        | ODI6        | 0.40             | [0.37, 0.43] | 0.45            | [0.40, 0.49] |
| ODI4        | ODI7        | 0.46             | [0.43, 0.49] | 0.51            | [0.47, 0.55] |
| ODI4        | ODI8        | 0.43             | [0.40, 0.46] | 0.48            | [0.44, 0.52] |
| ODI4        | ODI9        | 0.32             | [0.29, 0.35] | 0.35            | [0.30, 0.39] |
| ODI5        | ODI6        | 0.39             | [0.36, 0.41] | 0.44            | [0.40, 0.49] |
| ODI5        | ODI7        | 0.47             | [0.45, 0.50] | 0.54            | [0.50, 0.57] |
| ODI5        | ODI8        | 0.44             | [0.41, 0.46] | 0.50            | [0.46, 0.54] |
| ODI5        | ODI9        | 0.31             | [0.27, 0.34] | 0.34            | [0.30, 0.39] |
| ODI6        | ODI7        | 0.54             | [0.51, 0.56] | 0.60            | [0.57, 0.63] |
| ODI6        | ODI8        | 0.45             | [0.42, 0.48] | 0.52            | [0.48, 0.55] |
| ODI6        | ODI9        | 0.43             | [0.40, 0.45] | 0.48            | [0.43, 0.52] |
| ODI7        | ODI8        | 0.65             | [0.63, 0.67] | 0.71            | [0.69, 0.74] |
| ODI7        | ODI9        | 0.38             | [0.35, 0.41] | 0.43            | [0.38, 0.47] |
| ODI8        | ODI9        | 0.38             | [0.35, 0.41] | 0.42            | [0.38, 0.46] |

*Notes.* **N** = 1,485. CI: confidence interval. All correlations are statistically significant at  $p < .001$ . ODI1: anhedonia; ODI2: depressed mood; ODI3: sleep alterations; ODI4: fatigue/loss of energy; ODI5: appetite alterations; ODI6: feelings of worthlessness; ODI7: cognitive impairment; ODI8: psychomotor alterations; ODI9: suicidal ideation.
